# Supplementary material for: Major patterns in the introgression history of Heliconius butterflies
Source: eLife. 2023 Dec 18;12:RP90656. doi: 10.7554/eLife.90656 (PMC10727504; doi:10.7554/eLife.90656)
Supplement: Supplementary file 1. — (a) Sample information. (b) Coordinates of chromosome inversion regions considered in this study. (c) Number of coding and noncoding loci by chromosomal region in four versions of the 'etales-9spp' dataset. (d) Proportions of posterior species tree estimates (maximum a posteriori [MAP] trees) from bpp multispecies coalescent (MSC) analysis without gene flow of all four versions of the 'etales-9spp' dataset in blocks of 200 loci, with BNM clade (H. besckei, H. numata, H. melpomene) collapsed into a single tip, summarized into major regions: auto (all autosomes excluding inversion regions), the Z chromosome (chr 21, excluding the inversion region), and individual inversion regions (2b, 6b, 6c, 13b, and 21b). n = number of blocks. Tree indices correspond to those in Figure 1—figure supplement 2. A full list of MAP trees for each chromosomal region is provided in (e). Full results without BNM lumping are provided in (f and g). (e) Proportions of MAP trees from bpp MSC analysis without gene flow of all four versions of the 'etales-9spp' dataset in blocks of 200 loci, with BNM clade collapsed into a single tip, summarized by chromosomal region. Genome-wide summaries are given in (d). (f) Full results from bpp MSC analysis without gene flow of the 'etales-9spp' dataset, summarized into major regions of the genome. See also legend to (d). Trees are in a decreasing order of the total frequencies across all four versions of the dataset. Tree indices correspond to those in Figure 1—figure supplement 1. (g) Full results from bpp MSC analysis without gene flow of the 'etales-9spp' dataset, summarized by chromosomal region. See legend to (f). (h) Bayes factor B = M1E/M1D for comparing the two MSC-I models in Figure 1D (M1E; scenario 1) and Figure 1E (M1D; scenario 2), calculated for coding and noncoding loci for each chromosomal region using thermodynamic integration with 32 Gaussian quadrature points. M1E (scenario 2) is preferred if B>100, M1D (scenario 1) is preferred if B < 0 [file elife-90656-supp1.xlsx]

## Sheet: 1-a-datasets
Table 1. Sample information.
Species	Abbreviation	Sex	Locality	Source	Chr15 inversion	Clade	Source	Sample accession	Sample name	Dataset
										etales-9spp	etales-8spp	hmelv25-res	hmelv25-all	silv_chr15
Heliconius melpomene melpomene	Mel	female	Panama	inbred F4	P0/P0	melpomene-silvaniform	Edelman et al (2019)	SAMN11398293	D5	yes	yes	yes	yes	no
Heliconius cydno chioneus	Cyd	female	Panama	field	P0/P0	melpomene-silvaniform	Edelman et al (2019)	SAMN11398290	D2_Merrill67_insectary_723	no	no	yes	yes	no
Heliconius timareta linaresi	Tim	female	Colombia	lab, inbred	P0/P0	melpomene-silvaniform	Edelman et al (2019)	SAMN11357513	D1_RPI_2013_04	no	no	yes	yes	no
Heliconius besckei	Bes	male	Brazil	field	P0/P0	melpomene-silvaniform	Edelman et al (2019)	SAMN11398299	110-111	yes	no	yes	yes	no
Heliconius numata tarapotensis	Num	female	Peru	inbred F3	P1/P1	melpomene-silvaniform	Edelman et al (2019)	SAMN11398292	D4_MC13-99	yes	yes	yes	yes	no
Heliconius hecale sisyphus	Hec	female	Peru	field	P0/P0	melpomene-silvaniform	Edelman et al (2019)	SAMN11398291	D3_MC13-103	no	no	yes	yes	no
Heliconius elevatus pseudocupidineus	Ele	female	Peru	lab	P0/P0	melpomene-silvaniform	Edelman et al (2019)	SAMN11398304	GELE	no	no	yes	yes	no
Heliconius pardalinus butleri	Par	female	Peru	inbred	P1/P1	melpomene-silvaniform	Edelman et al (2019)	SAMN11398301	REL13-139	no	no	yes	yes	no
Heliconius burneyi huebneri	Bur	male	Peru	field	P0/P0	burneyi	Edelman et al (2019)	SAMN11398302	09-93	yes	yes	no	yes	no
Heliconius doris viridis	Dor	male	Panama	lab	P0/P0	doris	Edelman et al (2019)	SAMN11398297	6897	yes	yes	no	yes	no
Neruda aoede cupidineus	Aoe	female	Peru: Michaela Bastida	field	P0/P0	aoede	Wallbank et al (2016)	SAMEA3670507	JM-09-347	yes	yes	no	yes	no
Heliconius erato demophoon	Era	female	Panama	inbred	P0/P0	erato	Edelman et al (2019)	SAMN11398296	6394	yes	yes	no	yes	no
Heliconius sara magdalena	Sar	male	Panama	lab, inbred	P0/P0	sara	Edelman et al (2019)	SAMN11398307	CAM008802	yes	yes	no	no	no
Eueides tales michaeli	Tal	female	Peru	field	P0/P0	Eueides	Edelman et al (2019)	SAMN11398300	09-132	yes	yes	no	no	no
Heliconius numata laura	Num00	female	Colombia		P0/P0	melpomene-silvaniform	Jay et al (2021)	SAMEA7320944	Hn_laura_Co_M2386	no	no	no	no	yes
Heliconius numata silvana	Num00	female	French Guiana		P0/P0	melpomene-silvaniform	Jay et al (2021)	SAMEA7320947	Nu_Sil_FG3	no	no	no	no	yes
Heliconius numata bicoloratus	Num11	male	Peru		P1/P1	melpomene-silvaniform	Jay et al (2021)	SAMEA7320966	Hn_bicoloratus_Pe_MJ11_3140	no	no	no	no	yes
Heliconius numata bicoloratus	Num11	male	Peru		P1/P1	melpomene-silvaniform	Jay et al (2021)	SAMEA7320967	Hn_bicoloratus_Pe_MJ11_3141	no	no	no	no	yes
Heliconius ismenius boulleti	Ism		Panama	field	P0/P0	melpomene-silvaniform	Jay et al (2018)	SAMN09206388	I_bou_MJ11_2140	no	no	no	no	yes
Heliconius ismenius telchinia	Ism		Panama	field	P0/P0	melpomene-silvaniform	Jay et al (2018)	SAMN09206390	I_tel_MJ11_2014	no	no	no	no	yes
Heliconius pardalinus butleri	Par		Peru	field	P1/P1	melpomene-silvaniform	Jay et al (2018)	SAMN09206393	Sample_Hel_21_09-105	no	no	no	no	yes
Heliconius pardalinus cf. butleri	Par		Ecuador	field	P1/P1	melpomene-silvaniform	Jay et al (2018)	SAMN09206397	Sample_Hel_15_20775	no	no	no	no	yes
Heliconius elevatus elevatus	Ele		Ecuador	field	P0/P0	melpomene-silvaniform	Jay et al (2018)	SAMN09206399	Sample_Hel_17_16933	no	no	no	no	yes
Heliconius elevatus bari	Ele		French Guiana: Patawa Laie	field	P0/P0	melpomene-silvaniform	Jay et al (2018)	SAMEA3670523	H_elev_bari_MJ09_4056	no	no	no	no	yes
Heliconius hecale felix	Hec		Peru: Michaela Bastida	field	P0/P0	melpomene-silvaniform	Jay et al (2018)	SAMEA3670531	09-272_Hel_hecale_HEL_6_CGATGT	no	no	no	no	yes
Heliconius hecale zuleika	Hec		Panama	field	P0/P0	melpomene-silvaniform	Jay et al (2018)	SAMN09206391	MJ11-2029_Hh_c	no	no	no	no	yes
Heliconius ethilla aerotome	Eth		Peru: Urahuasha	field	P0/P0	melpomene-silvaniform	Jay et al (2018)	SAMEA3670528	09-62_Hel_ethilla_HEL_2_CAGATC	no	no	no	no	yes
Heliconius ethilla aerotome	Eth		Peru: Urahuasha	field	P0/P0	melpomene-silvaniform	Jay et al (2018)	SAMEA3670529	09-66_Hel_ethilla_HEL_2_CTTGTA	no	no	no	no	yes
Total number of genomes										9	8	8	12	14

## Sheet: 2-b-inversion-coords
Table 2. Coordinates of chromosome inversion regions considered in this study.
Dataset	Inversion region	Hmel2.5 reference (hmelv25)	H. erato demophoon v1 reference (heradem)
etales-8spp	2b	Hmel202001o:2147755–2230606	Herato0206:880283–1059137
	6b	Hmel206001o:12129405–12279100	Herato0606:12189406–12361790
	6c	Hmel206001o:12280171–12591271	Herato0606:12364445–12757418
	13b	Hmel213001o:16917575–17154514	Herato1301:22304799–22668029
	21b	Hmel221001o:8021528–8342578	Herato2101:10432818–10815508
hmelv25-res	2b	Hmel202001o:4398947–6357046	n/a
	15b	Hmel215003o:1356511–1757545	n/a

## Sheet: 3-c-data-etales-9spp
Table 3. Number of coding and noncoding loci by chromosomal region in four versions of the 'etales-9spp' dataset.
Chr	Noncoding loci								Coding loci
	heradem reference				hmelv25 reference				heradem reference				hmelv25 reference
	minDP12		minDP20		minDP12		minDP20		minDP12		minDP20		minDP12		minDP20
	#loci	#blocks	#loci	#blocks	#loci	#blocks	#loci	#blocks	#loci	#blocks	#loci	#blocks	#loci	#blocks	#loci	#blocks
1	1422	8	931	5	2334	12	1656	9	3517	18	2491	13	3797	19	2770	14
2a	99	1	-	-	198	1	127	1	197	1	117	1	217	2	131	1
2b	15	1	-	-	18	1	8	1	14	1	9	1	15	1	9	1
2c	249	2	-	-	417	3	265	2	1136	6	687	4	1241	7	756	4
2	-	-	178	1	-	-	-	-	-	-	-	-	-	-	-	-
3	456	3	235	2	1351	7	925	5	1477	8	959	5	1571	8	1051	6
4	455	3	236	2	1163	6	680	4	1263	7	813	5	1325	7	887	5
5	669	4	368	2	1106	6	704	4	1519	8	1008	6	1565	8	1062	6
6a	949	5	511	3	1418	8	891	5	1928	10	1242	7	2001	11	1317	7
6b	18	1	10	1	21	1	15	1	20	1	14	1	27	1	19	1
6c	65	1	38	1	55	1	33	1	48	1	28	1	60	1	30	1
6d	46	1	27	1	46	1	26	1	167	1	98	1	174	1	100	1
7	1132	6	671	4	1755	9	1165	6	2515	13	1722	9	2423	13	1700	9
8	649	4	357	2	1002	6	654	4	1838	10	1200	6	1899	10	1277	7
9	480	3	247	2	942	5	542	3	1147	6	766	4	1168	6	772	4
10	1452	8	807	5	2275	12	1476	8	3745	19	2551	13	3703	19	2586	13
11	704	4	403	3	1238	7	784	4	2879	15	1966	10	2988	15	2072	11
12	1093	6	625	4	1777	9	1196	6	3308	17	2122	11	3369	17	2223	12
13a	1539	8	924	5	2296	12	1542	8	2938	15	1970	10	2856	15	1936	10
13b	33	1	10	1	78	1	46	1	2	1	2	1	2	1	2	1
13c	38	1	18	1	57	1	31	1	135	1	65	1	122	1	67	1
14	512	3	270	2	955	5	574	3	1562	8	999	5	1582	8	1044	6
15	611	4	322	2	971	5	569	3	1747	9	1117	6	1729	9	1116	6
16	720	4	373	2	1230	7	772	4	1258	7	856	5	1318	7	888	5
17	1312	7	801	5	1865	10	1272	7	2842	15	1856	10	2866	15	1935	10
18	1786	9	1086	6	2408	13	1705	9	2447	13	1618	9	2514	13	1730	9
19	1248	7	741	4	1943	10	1271	7	2838	15	1890	10	2951	15	2040	11
20	1053	6	646	4	1774	9	1269	7	3254	17	2248	12	3318	17	2337	12
21a	343	2	214	2	529	3	344	2	1591	8	1084	6	1510	8	1028	6
21b	62	1	40	1	67	1	38	1	92	1	69	1	64	1	45	1
21c	163	1	101	1	255	2	162	1	578	3	380	2	529	3	355	2
Total	19373	115	11190	74	31544	174	20742	119	48002	255	31947	176	48904	259	33285	183

## Sheet: 4-d-etales-9spp-msc-BNM
Table 4. Proportions of posterior species tree estimates (MAP trees) from bpp MSC analysis without gene flow of all four versions of the 'etales-9spp' dataset in blocks of 200 loci, with BNM clade (H. besckei, H. numata, H. melpomene) collapsed into a single tip, summarized into major regions: auto (all autosomes excluding inversion regions), the Z chromosome (chr 21, excluding the inversion regi…
region	group	tree	tree index BNM	H. erato reference				H. melpomene reference
				minDP12		minDP20		minDP12		minDP20
				n	proportion	n	proportion	n	proportion	n	proportion
Coding	auto	(((((BNM,Bur),Dor),Aoe),(Era,Sar)),Tal);	1	140	0.591	90	0.562	154	0.642	105	0.621
		(((((BNM,Dor),Bur),Aoe),(Era,Sar)),Tal);	2	42	0.177	26	0.163	46	0.192	31	0.183
		(((((BNM,Bur),Dor),(Era,Sar)),Aoe),Tal);	3	31	0.131	27	0.169	18	0.075	9	0.053
		(((((Bur,Dor),BNM),Aoe),(Era,Sar)),Tal);	4	5	0.021	6	0.037	12	0.05	9	0.053
		(((((BNM,Dor),Bur),(Era,Sar)),Aoe),Tal);	5	11	0.046	6	0.037	3	0.013	6	0.036
		(((((BNM,Bur),Aoe),Dor),(Era,Sar)),Tal);	6	0	0	0	0	0	0	2	0.012
		(((((BNM,Dor),Aoe),Bur),(Era,Sar)),Tal);	8	1	0.004	2	0.013	2	0.008	1	0.006
		(((((Aoe,BNM),Dor),Bur),(Era,Sar)),Tal);	9	0	0	0	0	4	0.017	4	0.024
		(((((Aoe,BNM),Bur),Dor),(Era,Sar)),Tal);	10	0	0	0	0	1	0.004	1	0.006
		((((Era,Sar),Aoe),((BNM,Bur),Dor)),Tal);	11	4	0.017	0	0	0	0	0	0
		(((((Bur,Dor),BNM),(Era,Sar)),Aoe),Tal);	14	3	0.013	3	0.019	0	0	0	0
		(((((Aoe,Dor),BNM),Bur),(Era,Sar)),Tal);	19	0	0	0	0	0	0	1	0.006
	2b	(((((BNM,Bur),Dor),Aoe),(Era,Sar)),Tal);	1	1	1	1	1	1	1	0	0
		((((Aoe,BNM),(Bur,Dor)),(Era,Sar)),Tal);	12	0	0	0	0	0	0	1	1
	6b	(((((BNM,Bur),Dor),Aoe),(Era,Sar)),Tal);	1	1	1	0	0	1	1	0	0
		(((((BNM,Bur),Aoe),Dor),(Era,Sar)),Tal);	6	0	0	1	1	0	0	1	1
	6c	(((((BNM,Bur),Dor),Aoe),(Era,Sar)),Tal);	1	1	1	1	1	1	1	1	1
	13b	((((Bur,Dor),(Era,Sar)),(Aoe,BNM)),Tal);	13	1	1	1	1	1	1	1	1
	21	(((((BNM,Bur),Dor),Aoe),(Era,Sar)),Tal);	1	6	0.545	4	0.5	7	0.636	5	0.714
		(((((BNM,Bur),Dor),(Era,Sar)),Aoe),Tal);	3	5	0.455	3	0.375	4	0.364	2	0.286
		(((((BNM,Dor),Bur),(Era,Sar)),Aoe),Tal);	5	0	0	1	0.125	0	0	0	0
	21b	(((((BNM,Bur),Dor),(Era,Sar)),Aoe),Tal);	3	1	1	0	0	1	1	0	0
		(((((BNM,Bur),(Era,Sar)),Dor),Aoe),Tal);	7	0	0	1	1	0	0	1	1
Noncoding	auto	(((((BNM,Bur),Dor),Aoe),(Era,Sar)),Tal);	1	58	0.552	33	0.541	111	0.703	71	0.64
		(((((BNM,Dor),Bur),Aoe),(Era,Sar)),Tal);	2	12	0.114	4	0.066	13	0.082	9	0.081
		(((((BNM,Bur),Dor),(Era,Sar)),Aoe),Tal);	3	18	0.171	13	0.213	13	0.082	3	0.027
		(((((Bur,Dor),BNM),Aoe),(Era,Sar)),Tal);	4	1	0.01	0	0	2	0.013	0	0
		(((((BNM,Dor),Bur),(Era,Sar)),Aoe),Tal);	5	5	0.048	1	0.016	0	0	0	0
		(((((BNM,Bur),Aoe),Dor),(Era,Sar)),Tal);	6	3	0.029	0	0	3	0.019	9	0.081
		(((((BNM,Bur),(Era,Sar)),Dor),Aoe),Tal);	7	1	0.01	0	0	2	0.013	3	0.027
		(((((BNM,Dor),Aoe),Bur),(Era,Sar)),Tal);	8	0	0	0	0	3	0.019	4	0.036
		(((((Aoe,BNM),Dor),Bur),(Era,Sar)),Tal);	9	0	0	0	0	2	0.013	3	0.027
		(((((Aoe,BNM),Bur),Dor),(Era,Sar)),Tal);	10	0	0	0	0	2	0.013	5	0.045
		((((Era,Sar),Aoe),((BNM,Bur),Dor)),Tal);	11	1	0.01	4	0.066	0	0	0	0
		((((Aoe,BNM),(Bur,Dor)),(Era,Sar)),Tal);	12	0	0	1	0.016	3	0.019	1	0.009
		(((((Bur,Dor),BNM),(Era,Sar)),Aoe),Tal);	14	0	0	1	0.016	0	0	1	0.009
		(((((BNM,Bur),Aoe),(Era,Sar)),Dor),Tal);	15	0	0	0	0	0	0	1	0.009
		((((((Era,Sar),BNM),Bur),Aoe),Dor),Tal);	17	1	0.01	0	0	0	0	0	0
		(((((BNM,Bur),(Era,Sar)),Aoe),Dor),Tal);	18	1	0.01	1	0.016	2	0.013	0	0
		(((((Aoe,Dor),BNM),Bur),(Era,Sar)),Tal);	19	1	0.01	0	0	0	0	0	0
		((((Era,Sar),Aoe),((BNM,Dor),Bur)),Tal);	23	0	0	1	0.016	0	0	0	0
		(((((Era,Sar),BNM),Bur),(Aoe,Dor)),Tal);	24	0	0	1	0.016	0	0	0	0
		(((((BNM,Dor),(Era,Sar)),Bur),Aoe),Tal);	26	1	0.01	1	0.016	0	0	0	0
		((((((Era,Sar),BNM),Bur),Dor),Aoe),Tal);	27	0	0	0	0	1	0.006	0	0
		((((((Era,Sar),BNM),Dor),Bur),Aoe),Tal);	28	1	0.01	0	0	1	0.006	0	0
		(((((Era,Sar),BNM),(Bur,Dor)),Aoe),Tal);	29	0	0	0	0	0	0	1	0.009
		(((((Era,Sar),Dor),(BNM,Bur)),Aoe),Tal);	30	1	0.01	0	0	0	0	0	0
	2b	(((((BNM,Dor),Aoe),Bur),(Era,Sar)),Tal);	8	1	1	-	-	0	0	0	0
		(((((Aoe,BNM),Dor),Bur),(Era,Sar)),Tal);	9	0	0	-	-	1	1	0	0
		((((((Era,Sar),BNM),Bur),Aoe),Tal),Dor);	21	0	0	-	-	0	0	1	1
	6b	(((((BNM,Bur),Dor),Aoe),(Era,Sar)),Tal);	1	1	1	0	0	1	1	0	0
		(((((BNM,Bur),Aoe),(Era,Sar)),Dor),Tal);	15	0	0	0	0	0	0	1	1
		(((((Era,Sar),Aoe),(BNM,Bur)),Dor),Tal);	20	0	0	1	1	0	0	0	0
	6c	((((Aoe,Dor),(BNM,Bur)),(Era,Sar)),Tal);	16	1	1	1	1	0	0	0	0
		((((((Era,Sar),BNM),Bur),Aoe),Dor),Tal);	17	0	0	0	0	0	0	1	1
		((((BNM,Bur),(Era,Sar)),(Aoe,Dor)),Tal);	25	0	0	0	0	1	1	0	0
	13b	((((Bur,Dor),(Era,Sar)),(Aoe,BNM)),Tal);	13	0	0	0	0	1	1	1	1
		(((((Era,Sar),Bur),Dor),(Aoe,BNM)),Tal);	22	1	1	1	1	0	0	0	0
	21	(((((BNM,Bur),Dor),Aoe),(Era,Sar)),Tal);	1	1	0.333	0	0	3	0.6	2	0.667
		(((((BNM,Bur),Dor),(Era,Sar)),Aoe),Tal);	3	1	0.333	0	0	0	0	0	0
		(((((BNM,Bur),Aoe),Dor),(Era,Sar)),Tal);	6	0	0	0	0	1	0.2	1	0.333
		(((((BNM,Bur),(Era,Sar)),Dor),Aoe),Tal);	7	0	0	0	0	1	0.2	0	0
		((((Era,Sar),Aoe),((BNM,Bur),Dor)),Tal);	11	1	0.333	2	1	0	0	0	0
	21b	(((((BNM,Bur),(Era,Sar)),Dor),Aoe),Tal);	7	1	1	1	1	1	1	1	1

## Sheet: 5-e-etales-9spp-msc-BNM-chr
Table 5. Proportions of MAP trees from bpp MSC analysis without gene flow of all four versions of the 'etales-9spp' dataset in blocks of 200 loci, with BNM clade collapsed into a single tip, summarized by chromosomal region. Genome-wide summaries are given in Supplementary File 1—table 4.
region	group	tree	tree index BNM	H. erato reference				H. melpomene reference
				minDP12		minDP20		minDP12		minDP20
				n	proportion	n	proportion	n	proportion	n	proportion
Noncoding	1	(((((BNM,Bur),Dor),Aoe),(Era,Sar)),Tal);	1	5	0.714	2	0.4	6	0.5	4	0.444
	1	(((((BNM,Dor),Bur),Aoe),(Era,Sar)),Tal);	2	0	0	0	0	1	0.083	1	0.111
	1	(((((BNM,Bur),Dor),(Era,Sar)),Aoe),Tal);	3	2	0.286	1	0.2	3	0.25	1	0.111
	1	(((((BNM,Dor),Bur),(Era,Sar)),Aoe),Tal);	5	0	0	1	0.2	0	0	0	0
	1	(((((BNM,Bur),Aoe),Dor),(Era,Sar)),Tal);	6	0	0	0	0	1	0.083	1	0.111
	1	(((((Aoe,BNM),Bur),Dor),(Era,Sar)),Tal);	10	0	0	0	0	0	0	1	0.111
	1	((((Aoe,BNM),(Bur,Dor)),(Era,Sar)),Tal);	12	0	0	1	0.2	1	0.083	0	0
	1	(((((Era,Sar),BNM),(Bur,Dor)),Aoe),Tal);	29	0	0	0	0	0	0	1	0.111
	2a	(((((BNM,Bur),Dor),Aoe),(Era,Sar)),Tal);	1	1	1	n/a	n/a	1	1	0	0
	2a	(((((BNM,Bur),Aoe),Dor),(Era,Sar)),Tal);	6	0	0	n/a	n/a	0	0	1	1
	2b	(((((BNM,Dor),Aoe),Bur),(Era,Sar)),Tal);	8	1	1	n/a	n/a	0	0	0	0
	2b	(((((Aoe,BNM),Dor),Bur),(Era,Sar)),Tal);	9	0	0	n/a	n/a	1	1	0	0
	2b	((((((Era,Sar),BNM),Bur),Aoe),Tal),Dor);	21	0	0	n/a	n/a	0	0	1	1
	2c	(((((BNM,Bur),Dor),Aoe),(Era,Sar)),Tal);	1	0	0	n/a	n/a	2	1	1	0.5
	2c	(((((BNM,Bur),Dor),(Era,Sar)),Aoe),Tal);	3	1	0.5	n/a	n/a	0	0	0	0
	2c	(((((Bur,Dor),BNM),Aoe),(Era,Sar)),Tal);	4	1	0.5	n/a	n/a	0	0	0	0
	2c	(((((BNM,Bur),Aoe),Dor),(Era,Sar)),Tal);	6	0	0	n/a	n/a	0	0	1	0.5
	2	(((((BNM,Bur),Dor),Aoe),(Era,Sar)),Tal);	1	n/a	n/a	1	1	n/a	n/a	n/a	n/a
	3	(((((BNM,Bur),Dor),Aoe),(Era,Sar)),Tal);	1	2	0.667	1	1	6	0.857	4	0.8
	3	(((((BNM,Dor),Bur),Aoe),(Era,Sar)),Tal);	2	0	0	0	0	1	0.143	1	0.2
	3	(((((Era,Sar),Dor),(BNM,Bur)),Aoe),Tal);	30	1	0.333	0	0	0	0	0	0
	4	(((((BNM,Bur),Dor),Aoe),(Era,Sar)),Tal);	1	1	0.333	1	1	3	0.5	1	0.25
	4	(((((BNM,Dor),Bur),(Era,Sar)),Aoe),Tal);	5	1	0.333	0	0	0	0	0	0
	4	(((((BNM,Dor),Aoe),Bur),(Era,Sar)),Tal);	8	0	0	0	0	2	0.333	1	0.25
	4	(((((Aoe,BNM),Dor),Bur),(Era,Sar)),Tal);	9	0	0	0	0	0	0	1	0.25
	4	(((((Aoe,BNM),Bur),Dor),(Era,Sar)),Tal);	10	0	0	0	0	1	0.167	1	0.25
	4	((((((Era,Sar),BNM),Dor),Bur),Aoe),Tal);	28	1	0.333	0	0	0	0	0	0
	5	(((((BNM,Bur),Dor),Aoe),(Era,Sar)),Tal);	1	3	0.75	2	1	6	1	3	0.75
	5	(((((BNM,Dor),Bur),Aoe),(Era,Sar)),Tal);	2	1	0.25	0	0	0	0	1	0.25
	6a	(((((BNM,Bur),Dor),Aoe),(Era,Sar)),Tal);	1	2	0.4	1	0.333	5	0.714	4	0.8
	6a	(((((BNM,Dor),Bur),Aoe),(Era,Sar)),Tal);	2	1	0.2	1	0.333	2	0.286	0	0
	6a	(((((BNM,Bur),Dor),(Era,Sar)),Aoe),Tal);	3	0	0	1	0.333	0	0	0	0
	6a	(((((BNM,Dor),Bur),(Era,Sar)),Aoe),Tal);	5	1	0.2	0	0	0	0	0	0
	6a	(((((BNM,Bur),Aoe),Dor),(Era,Sar)),Tal);	6	1	0.2	0	0	0	0	1	0.2
	6b	(((((BNM,Bur),Dor),Aoe),(Era,Sar)),Tal);	1	1	1	0	0	1	1	0	0
	6b	(((((BNM,Bur),Aoe),(Era,Sar)),Dor),Tal);	15	0	0	0	0	0	0	1	1
	6b	(((((Era,Sar),Aoe),(BNM,Bur)),Dor),Tal);	20	0	0	1	1	0	0	0	0
	6c	((((Aoe,Dor),(BNM,Bur)),(Era,Sar)),Tal);	16	1	1	1	1	0	0	0	0
	6c	((((((Era,Sar),BNM),Bur),Aoe),Dor),Tal);	17	0	0	0	0	0	0	1	1
	6c	((((BNM,Bur),(Era,Sar)),(Aoe,Dor)),Tal);	25	0	0	0	0	1	1	0	0
	6d	(((((BNM,Bur),Dor),(Era,Sar)),Aoe),Tal);	3	1	1	0	0	0	0	1	1
	6d	(((((BNM,Dor),(Era,Sar)),Bur),Aoe),Tal);	26	0	0	1	1	0	0	0	0
	6d	((((((Era,Sar),BNM),Bur),Dor),Aoe),Tal);	27	0	0	0	0	1	1	0	0
	7	(((((BNM,Bur),Dor),Aoe),(Era,Sar)),Tal);	1	3	0.5	1	0.25	6	0.667	4	0.667
	7	(((((BNM,Dor),Bur),Aoe),(Era,Sar)),Tal);	2	1	0.167	1	0.25	0	0	0	0
	7	(((((BNM,Bur),Dor),(Era,Sar)),Aoe),Tal);	3	2	0.333	1	0.25	0	0	0	0
	7	(((((Aoe,BNM),Dor),Bur),(Era,Sar)),Tal);	9	0	0	0	0	2	0.222	0	0
	7	(((((Aoe,BNM),Bur),Dor),(Era,Sar)),Tal);	10	0	0	0	0	0	0	1	0.167
	7	((((Era,Sar),Aoe),((BNM,Bur),Dor)),Tal);	11	0	0	1	0.25	0	0	0	0
	7	(((((BNM,Bur),Aoe),(Era,Sar)),Dor),Tal);	15	0	0	0	0	0	0	1	0.167
	7	(((((BNM,Bur),(Era,Sar)),Aoe),Dor),Tal);	18	0	0	0	0	1	0.111	0	0
	8	(((((BNM,Bur),Dor),Aoe),(Era,Sar)),Tal);	1	4	1	2	1	3	0.6	1	0.25
	8	(((((BNM,Dor),Bur),Aoe),(Era,Sar)),Tal);	2	0	0	0	0	1	0.2	1	0.25
	8	(((((BNM,Bur),Aoe),Dor),(Era,Sar)),Tal);	6	0	0	0	0	1	0.2	1	0.25
	8	(((((BNM,Dor),Aoe),Bur),(Era,Sar)),Tal);	8	0	0	0	0	0	0	1	0.25
	9	(((((BNM,Bur),Dor),Aoe),(Era,Sar)),Tal);	1	2	0.667	2	1	4	0.8	2	0.667
	9	(((((BNM,Dor),Bur),Aoe),(Era,Sar)),Tal);	2	0	0	0	0	1	0.2	0	0
	9	(((((BNM,Bur),Aoe),Dor),(Era,Sar)),Tal);	6	1	0.333	0	0	0	0	1	0.333
	10	(((((BNM,Bur),Dor),Aoe),(Era,Sar)),Tal);	1	2	0.25	0	0	8	0.667	5	0.625
	10	(((((BNM,Dor),Bur),Aoe),(Era,Sar)),Tal);	2	0	0	0	0	2	0.167	0	0
	10	(((((BNM,Bur),Dor),(Era,Sar)),Aoe),Tal);	3	3	0.375	3	0.75	2	0.167	1	0.125
	10	(((((BNM,Dor),Bur),(Era,Sar)),Aoe),Tal);	5	1	0.125	0	0	0	0	0	0
	10	(((((BNM,Bur),(Era,Sar)),Dor),Aoe),Tal);	7	0	0	0	0	0	0	1	0.125
	10	(((((Aoe,BNM),Bur),Dor),(Era,Sar)),Tal);	10	0	0	0	0	0	0	1	0.125
	10	((((Era,Sar),Aoe),((BNM,Bur),Dor)),Tal);	11	1	0.125	1	0.25	0	0	0	0
	10	(((((BNM,Dor),(Era,Sar)),Bur),Aoe),Tal);	26	1	0.125	0	0	0	0	0	0
	11	(((((BNM,Bur),Dor),Aoe),(Era,Sar)),Tal);	1	2	0.5	1	0.5	5	0.833	4	1
	11	(((((BNM,Dor),Bur),Aoe),(Era,Sar)),Tal);	2	2	0.5	1	0.5	1	0.167	0	0
	12	(((((BNM,Bur),Dor),Aoe),(Era,Sar)),Tal);	1	3	0.5	2	0.667	8	0.889	4	0.667
	12	(((((BNM,Bur),Dor),(Era,Sar)),Aoe),Tal);	3	3	0.5	0	0	0	0	0	0
	12	(((((BNM,Bur),(Era,Sar)),Dor),Aoe),Tal);	7	0	0	0	0	0	0	1	0.167
	12	(((((Aoe,BNM),Dor),Bur),(Era,Sar)),Tal);	9	0	0	0	0	0	0	1	0.167
	12	((((Era,Sar),Aoe),((BNM,Bur),Dor)),Tal);	11	0	0	1	0.333	0	0	0	0
	12	(((((BNM,Bur),(Era,Sar)),Aoe),Dor),Tal);	18	0	0	0	0	1	0.111	0	0
	13a	(((((BNM,Bur),Dor),Aoe),(Era,Sar)),Tal);	1	5	0.625	3	0.6	9	0.75	8	1
	13a	(((((BNM,Bur),Dor),(Era,Sar)),Aoe),Tal);	3	2	0.25	1	0.2	3	0.25	0	0
	13a	(((((BNM,Dor),Bur),(Era,Sar)),Aoe),Tal);	5	1	0.125	0	0	0	0	0	0
	13a	((((Era,Sar),Aoe),((BNM,Bur),Dor)),Tal);	11	0	0	1	0.2	0	0	0	0
	13b	((((Bur,Dor),(Era,Sar)),(Aoe,BNM)),Tal);	13	0	0	0	0	1	1	1	1
	13b	(((((Era,Sar),Bur),Dor),(Aoe,BNM)),Tal);	22	1	1	1	1	0	0	0	0
	13c	(((((Aoe,BNM),Dor),Bur),(Era,Sar)),Tal);	9	0	0	0	0	0	0	1	1
	13c	(((((Aoe,Dor),BNM),Bur),(Era,Sar)),Tal);	19	1	1	0	0	0	0	0	0
	13c	(((((Era,Sar),BNM),Bur),(Aoe,Dor)),Tal);	24	0	0	1	1	0	0	0	0
	13c	((((((Era,Sar),BNM),Dor),Bur),Aoe),Tal);	28	0	0	0	0	1	1	0	0
	14	(((((BNM,Bur),Dor),Aoe),(Era,Sar)),Tal);	1	1	0.333	1	0.5	2	0.4	2	0.667
	14	(((((BNM,Dor),Bur),Aoe),(Era,Sar)),Tal);	2	2	0.667	0	0	2	0.4	0	0
	14	(((((BNM,Dor),Aoe),Bur),(Era,Sar)),Tal);	8	0	0	0	0	0	0	1	0.333
	14	(((((Aoe,BNM),Bur),Dor),(Era,Sar)),Tal);	10	0	0	0	0	1	0.2	0	0
	14	((((Era,Sar),Aoe),((BNM,Dor),Bur)),Tal);	23	0	0	1	0.5	0	0	0	0
	15	(((((BNM,Bur),Dor),Aoe),(Era,Sar)),Tal);	1	1	0.333	2	1	3	0.6	0	0
	15	(((((BNM,Dor),Bur),Aoe),(Era,Sar)),Tal);	2	2	0.667	0	0	1	0.2	1	0.333
	15	(((((BNM,Dor),Aoe),Bur),(Era,Sar)),Tal);	8	0	0	0	0	1	0.2	1	0.333
	15	(((((Aoe,BNM),Bur),Dor),(Era,Sar)),Tal);	10	0	0	0	0	0	0	1	0.333
	16	(((((BNM,Bur),Dor),Aoe),(Era,Sar)),Tal);	1	2	0.5	2	1	5	0.833	3	0.75
	16	(((((BNM,Dor),Bur),Aoe),(Era,Sar)),Tal);	2	1	0.25	0	0	0	0	1	0.25
	16	(((((BNM,Bur),Dor),(Era,Sar)),Aoe),Tal);	3	1	0.25	0	0	0	0	0	0
	16	(((((Bur,Dor),BNM),Aoe),(Era,Sar)),Tal);	4	0	0	0	0	1	0.167	0	0
	17	(((((BNM,Bur),Dor),Aoe),(Era,Sar)),Tal);	1	4	0.571	3	0.75	7	0.7	4	0.571
	17	(((((BNM,Dor),Bur),Aoe),(Era,Sar)),Tal);	2	1	0.143	1	0.25	1	0.1	1	0.143
	17	(((((BNM,Bur),Aoe),Dor),(Era,Sar)),Tal);	6	1	0.143	0	0	1	0.1	1	0.143
	17	((((Aoe,BNM),(Bur,Dor)),(Era,Sar)),Tal);	12	0	0	0	0	1	0.1	1	0.143
	17	(((((BNM,Bur),(Era,Sar)),Aoe),Dor),Tal);	18	1	0.143	0	0	0	0	0	0
	18	(((((BNM,Bur),Dor),Aoe),(Era,Sar)),Tal);	1	6	0.667	4	0.667	8	0.667	7	0.778
	18	(((((BNM,Dor),Bur),Aoe),(Era,Sar)),Tal);	2	1	0.111	0	0	0	0	0	0
	18	(((((BNM,Bur),Dor),(Era,Sar)),Aoe),Tal);	3	2	0.222	1	0.167	3	0.25	0	0
	18	(((((Bur,Dor),BNM),Aoe),(Era,Sar)),Tal);	4	0	0	0	0	1	0.083	0	0
	18	(((((BNM,Bur),Aoe),Dor),(Era,Sar)),Tal);	6	0	0	0	0	0	0	1	0.111
	18	(((((Bur,Dor),BNM),(Era,Sar)),Aoe),Tal);	14	0	0	1	0.167	0	0	1	0.111
	19	(((((BNM,Bur),Dor),Aoe),(Era,Sar)),Tal);	1	4	0.571	0	0	6	0.6	4	0.571
	19	(((((BNM,Dor),Bur),Aoe),(Era,Sar)),Tal);	2	0	0	0	0	0	0	2	0.286
	19	(((((BNM,Bur),Dor),(Era,Sar)),Aoe),Tal);	3	1	0.143	3	0.75	2	0.2	0	0
	19	(((((BNM,Dor),Bur),(Era,Sar)),Aoe),Tal);	5	1	0.143	0	0	0	0	0	0
	19	(((((BNM,Bur),Aoe),Dor),(Era,Sar)),Tal);	6	0	0	0	0	0	0	1	0.143
	19	(((((BNM,Bur),(Era,Sar)),Dor),Aoe),Tal);	7	0	0	0	0	1	0.1	0	0
	19	((((Aoe,BNM),(Bur,Dor)),(Era,Sar)),Tal);	12	0	0	0	0	1	0.1	0	0
	19	((((((Era,Sar),BNM),Bur),Aoe),Dor),Tal);	17	1	0.143	0	0	0	0	0	0
	19	(((((BNM,Bur),(Era,Sar)),Aoe),Dor),Tal);	18	0	0	1	0.25	0	0	0	0
	20	(((((BNM,Bur),Dor),Aoe),(Era,Sar)),Tal);	1	5	0.833	2	0.5	8	0.889	6	0.857
	20	(((((BNM,Bur),Dor),(Era,Sar)),Aoe),Tal);	3	0	0	2	0.5	0	0	0	0
	20	(((((BNM,Bur),(Era,Sar)),Dor),Aoe),Tal);	7	1	0.167	0	0	1	0.111	1	0.143
	21a	(((((BNM,Bur),Dor),Aoe),(Era,Sar)),Tal);	1	1	0.5	0	0	2	0.667	2	1
	21a	(((((BNM,Bur),Dor),(Era,Sar)),Aoe),Tal);	3	1	0.5	0	0	0	0	0	0
	21a	(((((BNM,Bur),(Era,Sar)),Dor),Aoe),Tal);	7	0	0	0	0	1	0.333	0	0
	21a	((((Era,Sar),Aoe),((BNM,Bur),Dor)),Tal);	11	0	0	1	1	0	0	0	0
	21b	(((((BNM,Bur),(Era,Sar)),Dor),Aoe),Tal);	7	1	1	1	1	1	1	1	1
	21c	(((((BNM,Bur),Dor),Aoe),(Era,Sar)),Tal);	1	0	0	0	0	1	0.5	0	0
	21c	(((((BNM,Bur),Aoe),Dor),(Era,Sar)),Tal);	6	0	0	0	0	1	0.5	1	1
	21c	((((Era,Sar),Aoe),((BNM,Bur),Dor)),Tal);	11	1	1	1	1	0	0	0	0
Coding	1	(((((BNM,Bur),Dor),Aoe),(Era,Sar)),Tal);	1	11	0.611	6	0.462	11	0.579	10	0.714
	1	(((((BNM,Dor),Bur),Aoe),(Era,Sar)),Tal);	2	2	0.111	1	0.077	4	0.211	1	0.071
	1	(((((BNM,Bur),Dor),(Era,Sar)),Aoe),Tal);	3	5	0.278	5	0.385	4	0.211	2	0.143
	1	(((((BNM,Dor),Bur),(Era,Sar)),Aoe),Tal);	5	0	0	1	0.077	0	0	0	0
	1	(((((Aoe,BNM),Dor),Bur),(Era,Sar)),Tal);	9	0	0	0	0	0	0	1	0.071
	2a	(((((BNM,Dor),Bur),Aoe),(Era,Sar)),Tal);	2	1	1	1	1	1	1	1	1
	2b	(((((BNM,Bur),Dor),Aoe),(Era,Sar)),Tal);	1	1	1	1	1	1	1	0	0
	2b	((((Aoe,BNM),(Bur,Dor)),(Era,Sar)),Tal);	12	0	0	0	0	0	0	1	1
	2c	(((((BNM,Bur),Dor),Aoe),(Era,Sar)),Tal);	1	6	1	4	1	6	0.857	3	0.75
	2c	(((((Bur,Dor),BNM),Aoe),(Era,Sar)),Tal);	4	0	0	0	0	1	0.143	1	0.25
	3	(((((BNM,Bur),Dor),Aoe),(Era,Sar)),Tal);	1	4	0.5	4	0.8	6	0.75	4	0.667
	3	(((((BNM,Dor),Bur),Aoe),(Era,Sar)),Tal);	2	2	0.25	0	0	0	0	1	0.167
	3	(((((BNM,Bur),Dor),(Era,Sar)),Aoe),Tal);	3	1	0.125	1	0.2	0	0	0	0
	3	(((((Bur,Dor),BNM),Aoe),(Era,Sar)),Tal);	4	0	0	0	0	1	0.125	0	0
	3	(((((BNM,Dor),Bur),(Era,Sar)),Aoe),Tal);	5	0	0	0	0	0	0	1	0.167
	3	(((((Aoe,BNM),Dor),Bur),(Era,Sar)),Tal);	9	0	0	0	0	1	0.125	0	0
	3	((((Era,Sar),Aoe),((BNM,Bur),Dor)),Tal);	11	1	0.125	0	0	0	0	0	0
	4	(((((BNM,Bur),Dor),Aoe),(Era,Sar)),Tal);	1	3	0.429	2	0.5	4	0.571	2	0.4
	4	(((((BNM,Dor),Bur),Aoe),(Era,Sar)),Tal);	2	4	0.571	2	0.5	2	0.286	3	0.6
	4	(((((Aoe,BNM),Dor),Bur),(Era,Sar)),Tal);	9	0	0	0	0	1	0.143	0	0
	5	(((((BNM,Bur),Dor),Aoe),(Era,Sar)),Tal);	1	6	0.75	4	0.8	7	0.875	5	0.833
	5	(((((BNM,Dor),Bur),Aoe),(Era,Sar)),Tal);	2	2	0.25	1	0.2	1	0.125	0	0
	5	(((((BNM,Bur),Aoe),Dor),(Era,Sar)),Tal);	6	0	0	0	0	0	0	1	0.167
	6a	(((((BNM,Bur),Dor),Aoe),(Era,Sar)),Tal);	1	6	0.6	4	0.571	6	0.6	4	0.571
	6a	(((((BNM,Dor),Bur),Aoe),(Era,Sar)),Tal);	2	3	0.3	1	0.143	3	0.3	1	0.143
	6a	(((((BNM,Bur),Dor),(Era,Sar)),Aoe),Tal);	3	0	0	0	0	0	0	1	0.143
	6a	(((((Bur,Dor),BNM),Aoe),(Era,Sar)),Tal);	4	0	0	1	0.143	0	0	1	0.143
	6a	(((((BNM,Dor),Aoe),Bur),(Era,Sar)),Tal);	8	0	0	1	0.143	0	0	0	0
	6a	(((((Aoe,BNM),Dor),Bur),(Era,Sar)),Tal);	9	0	0	0	0	1	0.1	0	0
	6a	(((((Bur,Dor),BNM),(Era,Sar)),Aoe),Tal);	14	1	0.1	0	0	0	0	0	0
	6b	(((((BNM,Bur),Dor),Aoe),(Era,Sar)),Tal);	1	1	1	0	0	1	1	0	0
	6b	(((((BNM,Bur),Aoe),Dor),(Era,Sar)),Tal);	6	0	0	1	1	0	0	1	1
	6c	(((((BNM,Bur),Dor),Aoe),(Era,Sar)),Tal);	1	1	1	1	1	1	1	1	1
	6d	(((((BNM,Bur),Dor),Aoe),(Era,Sar)),Tal);	1	0	0	0	0	1	1	1	1
	6d	(((((BNM,Bur),Dor),(Era,Sar)),Aoe),Tal);	3	1	1	1	1	0	0	0	0
	7	(((((BNM,Bur),Dor),Aoe),(Era,Sar)),Tal);	1	5	0.385	3	0.333	7	0.583	6	0.667
	7	(((((BNM,Dor),Bur),Aoe),(Era,Sar)),Tal);	2	2	0.154	2	0.222	1	0.083	2	0.222
	7	(((((BNM,Bur),Dor),(Era,Sar)),Aoe),Tal);	3	4	0.308	2	0.222	4	0.333	1	0.111
	7	(((((Bur,Dor),BNM),Aoe),(Era,Sar)),Tal);	4	0	0	1	0.111	0	0	0	0
	7	(((((BNM,Dor),Bur),(Era,Sar)),Aoe),Tal);	5	1	0.077	0	0	0	0	0	0
	7	(((((Bur,Dor),BNM),(Era,Sar)),Aoe),Tal);	14	1	0.077	1	0.111	0	0	0	0
	8	(((((BNM,Bur),Dor),Aoe),(Era,Sar)),Tal);	1	5	0.556	5	0.833	8	0.8	4	0.571
	8	(((((BNM,Dor),Bur),Aoe),(Era,Sar)),Tal);	2	2	0.222	1	0.167	2	0.2	2	0.286
	8	(((((BNM,Bur),Dor),(Era,Sar)),Aoe),Tal);	3	1	0.111	0	0	0	0	0	0
	8	(((((Aoe,BNM),Dor),Bur),(Era,Sar)),Tal);	9	0	0	0	0	0	0	1	0.143
	8	((((Era,Sar),Aoe),((BNM,Bur),Dor)),Tal);	11	1	0.111	0	0	0	0	0	0
	9	(((((BNM,Bur),Dor),Aoe),(Era,Sar)),Tal);	1	4	0.667	4	1	5	0.833	3	0.75
	9	(((((BNM,Dor),Bur),Aoe),(Era,Sar)),Tal);	2	2	0.333	0	0	1	0.167	1	0.25
	10	(((((BNM,Bur),Dor),Aoe),(Era,Sar)),Tal);	1	10	0.526	5	0.385	12	0.632	7	0.538
	10	(((((BNM,Dor),Bur),Aoe),(Era,Sar)),Tal);	2	1	0.053	1	0.077	2	0.105	0	0
	10	(((((BNM,Bur),Dor),(Era,Sar)),Aoe),Tal);	3	5	0.263	3	0.231	1	0.053	1	0.077
	10	(((((Bur,Dor),BNM),Aoe),(Era,Sar)),Tal);	4	1	0.053	0	0	1	0.053	3	0.231
	10	(((((BNM,Dor),Bur),(Era,Sar)),Aoe),Tal);	5	1	0.053	2	0.154	2	0.105	2	0.154
	10	(((((BNM,Dor),Aoe),Bur),(Era,Sar)),Tal);	8	0	0	0	0	1	0.053	0	0
	10	(((((Bur,Dor),BNM),(Era,Sar)),Aoe),Tal);	14	1	0.053	2	0.154	0	0	0	0
	11	(((((BNM,Bur),Dor),Aoe),(Era,Sar)),Tal);	1	9	0.6	6	0.6	13	0.867	8	0.727
	11	(((((BNM,Dor),Bur),Aoe),(Era,Sar)),Tal);	2	4	0.267	2	0.2	2	0.133	2	0.182
	11	(((((BNM,Bur),Dor),(Era,Sar)),Aoe),Tal);	3	2	0.133	1	0.1	0	0	0	0
	11	(((((Bur,Dor),BNM),Aoe),(Era,Sar)),Tal);	4	0	0	1	0.1	0	0	0	0
	11	(((((Aoe,BNM),Bur),Dor),(Era,Sar)),Tal);	10	0	0	0	0	0	0	1	0.091
	12	(((((BNM,Bur),Dor),Aoe),(Era,Sar)),Tal);	1	13	0.765	7	0.636	12	0.706	8	0.727
	12	(((((BNM,Dor),Bur),Aoe),(Era,Sar)),Tal);	2	0	0	2	0.182	3	0.176	3	0.273
	12	(((((BNM,Bur),Dor),(Era,Sar)),Aoe),Tal);	3	1	0.059	1	0.091	1	0.059	0	0
	12	(((((Bur,Dor),BNM),Aoe),(Era,Sar)),Tal);	4	2	0.118	0	0	1	0.059	0	0
	12	(((((BNM,Dor),Bur),(Era,Sar)),Aoe),Tal);	5	1	0.059	1	0.091	0	0	0	0
	13a	(((((BNM,Bur),Dor),Aoe),(Era,Sar)),Tal);	1	6	0.4	6	0.6	7	0.467	5	0.5
	13a	(((((BNM,Dor),Bur),Aoe),(Era,Sar)),Tal);	2	3	0.2	2	0.2	3	0.2	2	0.2
	13a	(((((BNM,Bur),Dor),(Era,Sar)),Aoe),Tal);	3	3	0.2	2	0.2	2	0.133	1	0.1
	13a	(((((Bur,Dor),BNM),Aoe),(Era,Sar)),Tal);	4	0	0	0	0	2	0.133	1	0.1
	13a	(((((BNM,Dor),Bur),(Era,Sar)),Aoe),Tal);	5	3	0.2	0	0	0	0	1	0.1
	13a	(((((Aoe,BNM),Bur),Dor),(Era,Sar)),Tal);	10	0	0	0	0	1	0.067	0	0
	13b	((((Bur,Dor),(Era,Sar)),(Aoe,BNM)),Tal);	13	1	1	1	1	1	1	1	1
	13c	(((((BNM,Dor),Bur),(Era,Sar)),Aoe),Tal);	5	1	1	1	1	1	1	1	1
	14	(((((BNM,Bur),Dor),Aoe),(Era,Sar)),Tal);	1	6	0.75	4	0.8	4	0.5	3	0.5
	14	(((((BNM,Dor),Bur),Aoe),(Era,Sar)),Tal);	2	2	0.25	1	0.2	4	0.5	3	0.5
	15	(((((BNM,Bur),Dor),Aoe),(Era,Sar)),Tal);	1	7	0.778	6	1	8	0.889	5	0.833
	15	(((((BNM,Dor),Bur),Aoe),(Era,Sar)),Tal);	2	2	0.222	0	0	0	0	0	0
	15	(((((Bur,Dor),BNM),Aoe),(Era,Sar)),Tal);	4	0	0	0	0	1	0.111	0	0
	15	(((((BNM,Bur),Aoe),Dor),(Era,Sar)),Tal);	6	0	0	0	0	0	0	1	0.167
	16	(((((BNM,Bur),Dor),Aoe),(Era,Sar)),Tal);	1	4	0.571	3	0.6	3	0.429	3	0.6
	16	(((((BNM,Dor),Bur),Aoe),(Era,Sar)),Tal);	2	2	0.286	2	0.4	4	0.571	1	0.2
	16	(((((BNM,Dor),Bur),(Era,Sar)),Aoe),Tal);	5	0	0	0	0	0	0	1	0.2
	16	((((Era,Sar),Aoe),((BNM,Bur),Dor)),Tal);	11	1	0.143	0	0	0	0	0	0
	17	(((((BNM,Bur),Dor),Aoe),(Era,Sar)),Tal);	1	10	0.667	3	0.3	10	0.667	4	0.4
	17	(((((BNM,Dor),Bur),Aoe),(Era,Sar)),Tal);	2	1	0.067	2	0.2	3	0.2	3	0.3
	17	(((((BNM,Bur),Dor),(Era,Sar)),Aoe),Tal);	3	3	0.2	4	0.4	1	0.067	1	0.1
	17	(((((Bur,Dor),BNM),Aoe),(Era,Sar)),Tal);	4	0	0	1	0.1	0	0	1	0.1
	17	(((((BNM,Dor),Aoe),Bur),(Era,Sar)),Tal);	8	1	0.067	0	0	1	0.067	1	0.1
	18	(((((BNM,Bur),Dor),Aoe),(Era,Sar)),Tal);	1	6	0.462	5	0.625	8	0.615	6	0.667
	18	(((((BNM,Dor),Bur),Aoe),(Era,Sar)),Tal);	2	3	0.231	1	0.125	1	0.077	2	0.222
	18	(((((BNM,Bur),Dor),(Era,Sar)),Aoe),Tal);	3	2	0.154	1	0.125	1	0.077	0	0
	18	(((((Bur,Dor),BNM),Aoe),(Era,Sar)),Tal);	4	2	0.154	1	0.125	2	0.154	0	0
	18	(((((Aoe,BNM),Dor),Bur),(Era,Sar)),Tal);	9	0	0	0	0	1	0.077	1	0.111
	19	(((((BNM,Bur),Dor),Aoe),(Era,Sar)),Tal);	1	9	0.643	6	0.6	11	0.733	7	0.636
	19	(((((BNM,Dor),Bur),Aoe),(Era,Sar)),Tal);	2	4	0.286	3	0.3	3	0.2	2	0.182
	19	(((((Bur,Dor),BNM),Aoe),(Era,Sar)),Tal);	4	0	0	0	0	1	0.067	0	0
	19	(((((BNM,Dor),Aoe),Bur),(Era,Sar)),Tal);	8	0	0	1	0.1	0	0	0	0
	19	(((((Aoe,BNM),Dor),Bur),(Era,Sar)),Tal);	9	0	0	0	0	0	0	1	0.091
	19	((((Era,Sar),Aoe),((BNM,Bur),Dor)),Tal);	11	1	0.071	0	0	0	0	0	0
	19	(((((Aoe,Dor),BNM),Bur),(Era,Sar)),Tal);	19	0	0	0	0	0	0	1	0.091
	20	(((((BNM,Bur),Dor),Aoe),(Era,Sar)),Tal);	1	10	0.588	3	0.25	5	0.294	7	0.583
	20	(((((BNM,Dor),Bur),Aoe),(Era,Sar)),Tal);	2	0	0	1	0.083	6	0.353	1	0.083
	20	(((((BNM,Bur),Dor),(Era,Sar)),Aoe),Tal);	3	3	0.176	6	0.5	4	0.235	2	0.167
	20	(((((Bur,Dor),BNM),Aoe),(Era,Sar)),Tal);	4	0	0	1	0.083	2	0.118	2	0.167
	20	(((((BNM,Dor),Bur),(Era,Sar)),Aoe),Tal);	5	4	0.235	1	0.083	0	0	0	0
	21a	(((((BNM,Bur),Dor),Aoe),(Era,Sar)),Tal);	1	3	0.375	2	0.333	4	0.5	3	0.6
	21a	(((((BNM,Bur),Dor),(Era,Sar)),Aoe),Tal);	3	5	0.625	3	0.5	4	0.5	2	0.4
	21a	(((((BNM,Dor),Bur),(Era,Sar)),Aoe),Tal);	5	0	0	1	0.167	0	0	0	0
	21b	(((((BNM,Bur),Dor),(Era,Sar)),Aoe),Tal);	3	1	1	0	0	1	1	0	0
	21b	(((((BNM,Bur),(Era,Sar)),Dor),Aoe),Tal);	7	0	0	1	1	0	0	1	1
	21c	(((((BNM,Bur),Dor),Aoe),(Era,Sar)),Tal);	1	3	1	2	1	3	1	2	1

## Sheet: 6-f-etales-9spp-msc
Table 6. Full results from BPP MSC analysis without gene flow of the 'etales-9spp' dataset, summarized into major regions of the genome. See also legend to Supplementary File 1—table 4. Trees are in a decreasing order of the total frequencies across all four versions of the dataset. Tree indices correspond to those in Figure 1—figure supplement 1.
region	group	tree	tree index	H. erato reference				H. melpomene reference
				minDP12		minDP20		minDP12		minDP20
				n	proportion	n	proportion	n	proportion	n	proportion
Coding	auto	(((Aoe, (((Bes, (Mel, Num)), Bur), Dor)), (Era, Sar)), Tal);	1	57	0.240 (0.33, 0.67, 0.99)	36	0.225 (0.23, 0.75, 0.99)	63	0.263 (0.20, 0.60, 0.99)	45	0.266 (0.27, 0.68, 0.99)
		(((Aoe, ((((Bes, Num), Mel), Bur), Dor)), (Era, Sar)), Tal);	2	77	0.325 (0.21, 0.69, 1.00)	49	0.306 (0.29, 0.72, 1.00)	88	0.367 (0.21, 0.69, 0.99)	59	0.349 (0.24, 0.70, 1.00)
		(((Aoe, ((((Bes, Num), Mel), Dor), Bur)), (Era, Sar)), Tal);	3	20	0.084 (0.24, 0.43, 0.96)	17	0.106 (0.14, 0.60, 0.81)	32	0.133 (0.08, 0.57, 0.91)	19	0.112 (0.27, 0.62, 0.89)
		((Aoe, (((((Bes, Num), Mel), Bur), Dor), (Era, Sar))), Tal);	4	18	0.076 (0.37, 0.63, 1.00)	19	0.119 (0.23, 0.66, 1.00)	11	0.046 (0.40, 0.54, 1.00)	6	0.035 (0.49, 0.70, 1.00)
		(((Aoe, (((Bes, (Mel, Num)), Dor), Bur)), (Era, Sar)), Tal);	5	20	0.084 (0.27, 0.56, 1.00)	9	0.056 (0.16, 0.41, 0.82)	13	0.054 (0.22, 0.57, 0.93)	12	0.071 (0.27, 0.50, 0.75)
		((Aoe, ((((Bes, (Mel, Num)), Bur), Dor), (Era, Sar))), Tal);	6	13	0.055 (0.21, 0.53, 1.00)	8	0.050 (0.35, 0.51, 1.00)	6	0.025 (0.49, 0.66, 1.00)	3	0.018 (0.48, 0.69, 1.00)
		(((Aoe, ((Bes, (Mel, Num)), (Bur, Dor))), (Era, Sar)), Tal);	7	1	0.004 (0.59, 0.59, 0.59)	3	0.019 (0.27, 0.40, 0.59)	6	0.025 (0.18, 0.45, 0.52)	6	0.035 (0.18, 0.43, 0.70)
		((Aoe, (((((Bes, Num), Mel), Dor), Bur), (Era, Sar))), Tal);	8	6	0.025 (0.32, 0.58, 0.92)	4	0.025 (0.38, 0.56, 0.72)	3	0.013 (0.43, 0.67, 0.71)	3	0.018 (0.30, 0.41, 0.47)
		(((Aoe, ((((Bes, Mel), Num), Bur), Dor)), (Era, Sar)), Tal);	9	6	0.025 (0.24, 0.65, 0.84)	5	0.031 (0.55, 0.65, 0.94)	3	0.013 (0.19, 0.32, 0.82)	1	0.006 (0.43, 0.43, 0.43)
		(((Aoe, (((Bes, Num), Mel), (Bur, Dor))), (Era, Sar)), Tal);	10	4	0.017 (0.40, 0.66, 0.99)	3	0.019 (0.45, 0.51, 0.77)	5	0.021 (0.27, 0.39, 0.93)	3	0.018 (0.35, 0.42, 0.69)
		((((Aoe, ((Bes, (Mel, Num)), Bur)), Dor), (Era, Sar)), Tal);	11	0	0	0	0	0	0	1	0.006 (0.55, 0.55, 0.55)
		((Aoe, ((((Bes, (Mel, Num)), Dor), Bur), (Era, Sar))), Tal);	12	4	0.017 (0.25, 0.32, 0.52)	1	0.006 (0.63, 0.63, 0.63)	0	0	3	0.018 (0.13, 0.29, 0.38)
		((((Aoe, ((Bes, (Mel, Num)), Dor)), Bur), (Era, Sar)), Tal);	14	1	0.004 (0.77, 0.77, 0.77)	1	0.006 (0.15, 0.15, 0.15)	2	0.008 (0.36, 0.66, 0.96)	1	0.006 (0.93, 0.93, 0.93)
		(((((Aoe, (Bes, (Mel, Num))), Dor), Bur), (Era, Sar)), Tal);	15	0	0	0	0	1	0.004 (0.76, 0.76, 0.76)	3	0.018 (0.17, 0.48, 0.84)
		(((((Aoe, (Bes, (Mel, Num))), Bur), Dor), (Era, Sar)), Tal);	16	0	0	0	0	0	0	1	0.006 (0.28, 0.28, 0.28)
		((((Aoe, (((Bes, Num), Mel), Bur)), Dor), (Era, Sar)), Tal);	17	0	0	0	0	0	0	1	0.006 (0.56, 0.56, 0.56)
		(((Aoe, (Era, Sar)), ((((Bes, Num), Mel), Bur), Dor)), Tal);	18	3	0.013 (0.26, 0.39, 0.67)	0	0	0	0	0	0
		(((((Aoe, ((Bes, Num), Mel)), Dor), Bur), (Era, Sar)), Tal);	19	0	0	0	0	3	0.013 (0.21, 0.24, 0.66)	1	0.006 (0.22, 0.22, 0.22)
		(((Aoe, (Era, Sar)), (((Bes, (Mel, Num)), Bur), Dor)), Tal);	21	1	0.004 (0.28, 0.28, 0.28)	0	0	0	0	0	0
		((Aoe, ((((Bes, Num), Mel), (Bur, Dor)), (Era, Sar))), Tal);	23	2	0.008 (0.31, 0.42, 0.53)	1	0.006 (0.59, 0.59, 0.59)	0	0	0	0
		((Aoe, (((Bes, (Mel, Num)), (Bur, Dor)), (Era, Sar))), Tal);	24	1	0.004 (0.17, 0.17, 0.17)	2	0.013 (0.31, 0.51, 0.71)	0	0	0	0
		(((Aoe, ((((Bes, Mel), Num), Dor), Bur)), (Era, Sar)), Tal);	26	2	0.008 (0.47, 0.48, 0.49)	0	0	1	0.004 (0.64, 0.64, 0.64)	0	0
		(((((Aoe, ((Bes, Num), Mel)), Bur), Dor), (Era, Sar)), Tal);	27	0	0	0	0	1	0.004 (0.26, 0.26, 0.26)	0	0
		((Aoe, (((((Bes, Mel), Num), Bur), Dor), (Era, Sar))), Tal);	34	0	0	0	0	1	0.004 (0.51, 0.51, 0.51)	0	0
		((Aoe, (((((Bes, Mel), Num), Dor), Bur), (Era, Sar))), Tal);	35	1	0.004 (0.18, 0.18, 0.18)	1	0.006 (0.32, 0.32, 0.32)	0	0	0	0
		(((((Aoe, Dor), ((Bes, Num), Mel)), Bur), (Era, Sar)), Tal);	38	0	0	0	0	0	0	1	0.006 (0.35, 0.35, 0.35)
		((((Aoe, (((Bes, Mel), Num), Dor)), Bur), (Era, Sar)), Tal);	39	0	0	1	0.006 (0.11, 0.11, 0.11)	0	0	0	0
		(((Aoe, (((Bes, Mel), Num), (Bur, Dor))), (Era, Sar)), Tal);	43	0	0	0	0	1	0.004 (0.97, 0.97, 0.97)	0	0
	2b	(((Aoe, ((((Bes, Num), Mel), Bur), Dor)), (Era, Sar)), Tal);	2	1	1.000 (0.23, 0.23, 0.23)	1	1.000 (0.13, 0.13, 0.13)	1	1.000 (0.42, 0.42, 0.42)	0	0
		((((Aoe, ((Bes, Num), Mel)), (Bur, Dor)), (Era, Sar)), Tal);	20	0	0	0	0	0	0	1	1.000 (0.19, 0.19, 0.19)
	6b	(((Aoe, ((((Bes, Num), Mel), Bur), Dor)), (Era, Sar)), Tal);	2	1	1.000 (0.39, 0.39, 0.39)	0	0	1	1.000 (0.14, 0.14, 0.14)	0	0
		((((Aoe, (((Bes, Num), Mel), Bur)), Dor), (Era, Sar)), Tal);	17	0	0	1	1.000 (0.35, 0.35, 0.35)	0	0	1	1.000 (0.18, 0.18, 0.18)
	6c	(((Aoe, ((((Bes, Num), Mel), Bur), Dor)), (Era, Sar)), Tal);	2	1	1.000 (0.51, 0.51, 0.51)	1	1.000 (0.28, 0.28, 0.28)	1	1.000 (0.66, 0.66, 0.66)	1	1.000 (0.31, 0.31, 0.31)
	13b	(((Aoe, ((Bes, Num), Mel)), ((Bur, Dor), (Era, Sar))), Tal);	22	1	1.000 (0.14, 0.14, 0.14)	1	1.000 (0.14, 0.14, 0.14)	0	0	0	0
	13b	(((Aoe, (Bes, (Mel, Num))), ((Bur, Dor), (Era, Sar))), Tal);	33	0	0	0	0	1	1.000 (0.15, 0.15, 0.15)	1	1.000 (0.18, 0.18, 0.18)
	21	(((Aoe, ((((Bes, Num), Mel), Bur), Dor)), (Era, Sar)), Tal);	2	6	0.545 (0.50, 0.82, 0.99)	4	0.500 (0.79, 0.91, 0.95)	7	0.636 (0.70, 0.96, 1.00)	5	0.714 (0.85, 0.95, 1.00)
		((Aoe, (((((Bes, Num), Mel), Bur), Dor), (Era, Sar))), Tal);	4	5	0.455 (0.48, 0.98, 1.00)	3	0.375 (0.62, 0.71, 0.78)	4	0.364 (0.63, 0.88, 1.00)	2	0.286 (0.72, 0.80, 0.89)
		((Aoe, (((((Bes, Num), Mel), Dor), Bur), (Era, Sar))), Tal);	8	0	0	1	0.125 (0.69, 0.69, 0.69)	0	0	0	0
	21b	((Aoe, (((((Bes, Num), Mel), Bur), Dor), (Era, Sar))), Tal);	4	1	1.000 (0.60, 0.60, 0.60)	0	0	1	1.000 (0.64, 0.64, 0.64)	0	0
		((Aoe, (((((Bes, Num), Mel), Bur), (Era, Sar)), Dor)), Tal);	13	0	0	1	1.000 (0.62, 0.62, 0.62)	0	0	1	1.000 (0.35, 0.35, 0.35)
Noncoding	auto	(((Aoe, (((Bes, (Mel, Num)), Bur), Dor)), (Era, Sar)), Tal);	1	43	0.409 (0.21, 0.67, 0.97)	20	0.328 (0.11, 0.57, 0.94)	90	0.570 (0.30, 0.72, 0.98)	57	0.513 (0.30, 0.68, 0.93)
		(((Aoe, ((((Bes, Num), Mel), Bur), Dor)), (Era, Sar)), Tal);	2	14	0.133 (0.24, 0.57, 0.95)	13	0.213 (0.25, 0.47, 0.95)	21	0.133 (0.22, 0.52, 0.98)	14	0.126 (0.28, 0.53, 0.82)
		(((Aoe, ((((Bes, Num), Mel), Dor), Bur)), (Era, Sar)), Tal);	3	2	0.019 (0.25, 0.46, 0.66)	1	0.016 (0.74, 0.74, 0.74)	5	0.032 (0.29, 0.43, 0.62)	4	0.036 (0.24, 0.43, 0.57)
		((Aoe, (((((Bes, Num), Mel), Bur), Dor), (Era, Sar))), Tal);	4	6	0.057 (0.42, 0.59, 0.94)	4	0.066 (0.20, 0.34, 0.41)	5	0.032 (0.30, 0.42, 0.61)	0	0
		(((Aoe, (((Bes, (Mel, Num)), Dor), Bur)), (Era, Sar)), Tal);	5	10	0.095 (0.19, 0.50, 0.72)	3	0.049 (0.55, 0.73, 0.75)	8	0.051 (0.36, 0.43, 0.73)	5	0.045 (0.07, 0.39, 0.70)
		((Aoe, ((((Bes, (Mel, Num)), Bur), Dor), (Era, Sar))), Tal);	6	11	0.105 (0.20, 0.47, 0.72)	9	0.147 (0.28, 0.51, 0.92)	8	0.051 (0.21, 0.42, 0.61)	3	0.027 (0.09, 0.24, 0.42)
		(((Aoe, ((Bes, (Mel, Num)), (Bur, Dor))), (Era, Sar)), Tal);	7	0	0	0	0	2	0.013 (0.44, 0.49, 0.54)	0	0
		((Aoe, (((((Bes, Num), Mel), Dor), Bur), (Era, Sar))), Tal);	8	1	0.009 (0.20, 0.20, 0.20)	0	0	0	0	0	0
		(((Aoe, ((((Bes, Mel), Num), Bur), Dor)), (Era, Sar)), Tal);	9	1	0.009 (0.76, 0.76, 0.76)	0	0	0	0	0	0
		(((Aoe, (((Bes, Num), Mel), (Bur, Dor))), (Era, Sar)), Tal);	10	1	0.009 (0.10, 0.10, 0.10)	0	0	0	0	0	0
		((((Aoe, ((Bes, (Mel, Num)), Bur)), Dor), (Era, Sar)), Tal);	11	3	0.029 (0.22, 0.25, 0.38)	0	0	2	0.013 (0.36, 0.40, 0.44)	8	0.072 (0.10, 0.50, 0.54)
		((Aoe, ((((Bes, (Mel, Num)), Dor), Bur), (Era, Sar))), Tal);	12	4	0.038 (0.34, 0.41, 0.56)	1	0.016 (0.42, 0.42, 0.42)	0	0	0	0
		((Aoe, (((((Bes, Num), Mel), Bur), (Era, Sar)), Dor)), Tal);	13	1	0.009 (0.21, 0.21, 0.21)	0	0	1	0.006 (0.27, 0.27, 0.27)	2	0.018 (0.09, 0.27, 0.45)
		((((Aoe, ((Bes, (Mel, Num)), Dor)), Bur), (Era, Sar)), Tal);	14	0	0	0	0	3	0.019 (0.42, 0.47, 0.72)	2	0.018 (0.35, 0.49, 0.62)
		(((((Aoe, (Bes, (Mel, Num))), Dor), Bur), (Era, Sar)), Tal);	15	0	0	0	0	2	0.013 (0.35, 0.45, 0.55)	3	0.027 (0.05, 0.23, 0.76)
		(((((Aoe, (Bes, (Mel, Num))), Bur), Dor), (Era, Sar)), Tal);	16	0	0	0	0	1	0.006 (0.50, 0.50, 0.50)	5	0.045 (0.18, 0.32, 0.46)
		((((Aoe, (((Bes, Num), Mel), Bur)), Dor), (Era, Sar)), Tal);	17	0	0	0	0	1	0.006 (0.37, 0.37, 0.37)	1	0.009 (0.62, 0.62, 0.62)
		(((Aoe, (Era, Sar)), ((((Bes, Num), Mel), Bur), Dor)), Tal);	18	0	0	1	0.016 (0.32, 0.32, 0.32)	0	0	0	0
		((((Aoe, ((Bes, Num), Mel)), (Bur, Dor)), (Era, Sar)), Tal);	20	0	0	1	0.016 (0.13, 0.13, 0.13)	2	0.013 (0.10, 0.15, 0.20)	1	0.009 (0.23, 0.23, 0.23)
		(((Aoe, (Era, Sar)), (((Bes, (Mel, Num)), Bur), Dor)), Tal);	21	1	0.009 (0.38, 0.38, 0.38)	3	0.049 (0.28, 0.47, 0.66)	0	0	0	0
		((Aoe, ((((Bes, Num), Mel), (Bur, Dor)), (Era, Sar))), Tal);	23	0	0	1	0.016 (0.35, 0.35, 0.35)	0	0	0	0
		((Aoe, (((Bes, (Mel, Num)), (Bur, Dor)), (Era, Sar))), Tal);	24	0	0	0	0	0	0	1	0.009 (0.43, 0.43, 0.43)
		((((Aoe, (((Bes, Num), Mel), Dor)), Bur), (Era, Sar)), Tal);	25	0	0	0	0	0	0	2	0.018 (0.37, 0.37, 0.37)
		(((((Aoe, ((Bes, Num), Mel)), Bur), Dor), (Era, Sar)), Tal);	27	0	0	0	0	1	0.006 (0.23, 0.23, 0.23)	0	0
		((((Aoe, ((Bes, (Mel, Num)), Bur)), (Era, Sar)), Dor), Tal);	28	0	0	0	0	0	0	1	0.009 (0.23, 0.23, 0.23)
		(((Aoe, ((((Bes, Num), Mel), (Era, Sar)), Bur)), Dor), Tal);	30	1	0.009 (0.02, 0.02, 0.02)	0	0	0	0	0	0
		(((Aoe, ((((Bes, Num), Mel), Bur), (Era, Sar))), Dor), Tal);	31	1	0.009 (0.55, 0.55, 0.55)	0	0	1	0.006 (0.38, 0.38, 0.38)	0	0
		(((Aoe, (((Bes, (Mel, Num)), Bur), (Era, Sar))), Dor), Tal);	32	0	0	1	0.016 (0.14, 0.14, 0.14)	1	0.006 (0.30, 0.30, 0.30)	0	0
		((Aoe, (((((Bes, Mel), Num), Bur), Dor), (Era, Sar))), Tal);	34	1	0.009 (0.11, 0.11, 0.11)	0	0	0	0	0	0
		((Aoe, ((((Bes, (Mel, Num)), Bur), (Era, Sar)), Dor)), Tal);	36	0	0	0	0	1	0.006 (0.31, 0.31, 0.31)	1	0.009 (0.28, 0.28, 0.28)
		(((((Aoe, Dor), ((Bes, Mel), Num)), Bur), (Era, Sar)), Tal);	37	1	0.009 (0.04, 0.04, 0.04)	0	0	0	0	0	0
		((((Aoe, (Bes, (Mel, Num))), (Bur, Dor)), (Era, Sar)), Tal);	40	0	0	0	0	1	0.006 (0.30, 0.30, 0.30)	0	0
		(((Aoe, (Era, Sar)), ((((Bes, Num), Mel), Dor), Bur)), Tal);	46	0	0	1	0.016 (0.30, 0.30, 0.30)	0	0	0	0
		(((Aoe, Dor), ((((Bes, Mel), Num), (Era, Sar)), Bur)), Tal);	47	0	0	1	0.016 (0.03, 0.03, 0.03)	0	0	0	0
		((Aoe, (((((Bes, Mel), Num), Dor), (Era, Sar)), Bur)), Tal);	49	0	0	1	0.016 (0.08, 0.08, 0.08)	0	0	0	0
		((Aoe, (((((Bes, Num), Mel), (Era, Sar)), Bur), Dor)), Tal);	50	0	0	0	0	1	0.006 (0.07, 0.07, 0.07)	0	0
		((Aoe, (((((Bes, Num), Mel), (Era, Sar)), Dor), Bur)), Tal);	51	0	0	0	0	1	0.006 (0.09, 0.09, 0.09)	0	0
		((Aoe, (((((Bes, Num), Mel), Dor), (Era, Sar)), Bur)), Tal);	52	1	0.009 (0.14, 0.14, 0.14)	0	0	0	0	0	0
		((Aoe, ((((Bes, (Mel, Num)), (Era, Sar)), Dor), Bur)), Tal);	53	1	0.009 (0.21, 0.21, 0.21)	0	0	0	0	0	0
		((Aoe, (((Bes, (Mel, Num)), (Era, Sar)), (Bur, Dor))), Tal);	54	0	0	0	0	0	0	1	0.009 (0.06, 0.06, 0.06)
		((Aoe, (((Bes, (Mel, Num)), Bur), (Dor, (Era, Sar)))), Tal);	55	1	0.009 (0.23, 0.23, 0.23)	0	0	0	0	0	0
	2b	(((((Aoe, ((Bes, Num), Mel)), Dor), Bur), (Era, Sar)), Tal);	19	0	0	0	0	1	1.000 (0.07, 0.07, 0.07)	0	0
		((((Aoe, (((Bes, Num), Mel), Dor)), Bur), (Era, Sar)), Tal);	25	1	1.000 (0.14, 0.14, 0.14)	0	0	0	0	0	0
		(((Aoe, ((((Bes, Num), Mel), (Era, Sar)), Bur)), Tal), Dor);	42	0	0	0	0	0	0	1	1.000 (0.01, 0.01, 0.01)
	6b	(((Aoe, (((Bes, (Mel, Num)), Bur), Dor)), (Era, Sar)), Tal);	1	1	1.000 (0.06, 0.06, 0.06)	0	0	1	1.000 (0.15, 0.15, 0.15)	0	0
		((((Aoe, ((Bes, (Mel, Num)), Bur)), (Era, Sar)), Dor), Tal);	28	0	0	0	0	0	0	1	1.000 (0.08, 0.08, 0.08)
		((((Aoe, (Era, Sar)), (((Bes, Mel), Num), Bur)), Dor), Tal);	41	0	0	1	1.000 (0.04, 0.04, 0.04)	0	0	0	0
	6c	((((Aoe, Dor), (((Bes, Num), Mel), Bur)), (Era, Sar)), Tal);	29	1	1.000 (0.58, 0.58, 0.58)	1	1.000 (0.26, 0.26, 0.26)	0	0	0	0
		(((Aoe, ((((Bes, Num), Mel), (Era, Sar)), Bur)), Dor), Tal);	30	0	0	0	0	0	0	1	1.000 (0.19, 0.19, 0.19)
		(((Aoe, Dor), ((((Bes, Num), Mel), Bur), (Era, Sar))), Tal);	48	0	0	0	0	1	1.000 (0.19, 0.19, 0.19)	0	0
	13b	(((Aoe, ((Bes, Num), Mel)), ((Bur, Dor), (Era, Sar))), Tal);	22	0	0	0	0	1	1.000 (0.84, 0.84, 0.84)	1	1.000 (0.74, 0.74, 0.74)
		(((Aoe, ((Bes, Num), Mel)), ((Bur, (Era, Sar)), Dor)), Tal);	44	1	1.000 (0.25, 0.25, 0.25)	0	0	0	0	0	0
		(((Aoe, (Bes, (Mel, Num))), ((Bur, (Era, Sar)), Dor)), Tal);	45	0	0	1	1.000 (0.05, 0.05, 0.05)	0	0	0	0
	21	(((Aoe, ((((Bes, Num), Mel), Bur), Dor)), (Era, Sar)), Tal);	2	1	0.333 (0.50, 0.50, 0.50)	0	0	3	0.600 (0.41, 0.82, 0.98)	2	0.667 (0.67, 0.78, 0.88)
		((Aoe, (((((Bes, Num), Mel), Bur), Dor), (Era, Sar))), Tal);	4	1	0.333 (1.00, 1.00, 1.00)	0	0	0	0	0	0
		((Aoe, (((((Bes, Num), Mel), Bur), (Era, Sar)), Dor)), Tal);	13	0	0	0	0	1	0.200 (0.79, 0.79, 0.79)	0	0
		((((Aoe, (((Bes, Num), Mel), Bur)), Dor), (Era, Sar)), Tal);	17	0	0	0	0	1	0.200 (0.13, 0.13, 0.13)	1	0.333 (0.68, 0.68, 0.68)
		(((Aoe, (Era, Sar)), ((((Bes, Num), Mel), Bur), Dor)), Tal);	18	1	0.333 (0.38, 0.38, 0.38)	2	1.000 (0.56, 0.66, 0.76)	0	0	0	0
	21b	((Aoe, (((((Bes, Num), Mel), Bur), (Era, Sar)), Dor)), Tal);	13	1	1.000 (0.58, 0.58, 0.58)	1	1.000 (0.41, 0.41, 0.41)	1	1.000 (0.70, 0.70, 0.70)	1	1.000 (0.23, 0.23, 0.23)

## Sheet: 7-g-etales-9spp-msc-chr
Table 7. Full results from bpp MSC analysis without gene flow of the 'etales-9spp' dataset, summarized by chromosomal region. See legend to Supplementary File 1—table 6.
region	chr	tree	tree index	H. erato reference				H. melpomene reference
				minDP12		minDP20		minDP12		minDP20
				n	proportion	n	proportion	n	proportion	n	proportion
Coding	1	(((Aoe, (((Bes, (Mel, Num)), Bur), Dor)), (Era, Sar)), Tal);	1	6	0.333 (0.33, 0.58, 0.86)	3	0.231 (0.23, 0.69, 0.74)	3	0.158 (0.35, 0.65, 0.72)	5	0.357 (0.38, 0.53, 0.90)
	1	(((Aoe, ((((Bes, Num), Mel), Bur), Dor)), (Era, Sar)), Tal);	2	5	0.278 (0.64, 0.84, 0.90)	3	0.231 (0.37, 0.62, 0.68)	7	0.368 (0.56, 0.81, 0.92)	5	0.357 (0.40, 0.66, 0.93)
	1	(((Aoe, ((((Bes, Num), Mel), Dor), Bur)), (Era, Sar)), Tal);	3	1	0.056 (0.35, 0.35, 0.35)	1	0.077 (0.65, 0.65, 0.65)	3	0.158 (0.31, 0.60, 0.63)	1	0.071 (0.62, 0.62, 0.62)
	1	((Aoe, (((((Bes, Num), Mel), Bur), Dor), (Era, Sar))), Tal);	4	3	0.167 (0.82, 0.90, 1.00)	3	0.231 (0.23, 0.66, 1.00)	4	0.210 (0.47, 0.56, 1.00)	2	0.143 (0.65, 0.83, 1.00)
	1	(((Aoe, (((Bes, (Mel, Num)), Dor), Bur)), (Era, Sar)), Tal);	5	1	0.056 (0.51, 0.51, 0.51)	0	0	1	0.053 (0.39, 0.39, 0.39)	0	0
	1	((Aoe, ((((Bes, (Mel, Num)), Bur), Dor), (Era, Sar))), Tal);	6	2	0.111 (0.53, 0.76, 0.98)	2	0.154 (0.48, 0.64, 0.80)	0	0	0	0
	1	(((Aoe, ((((Bes, Mel), Num), Bur), Dor)), (Era, Sar)), Tal);	9	0	0	0	0	1	0.053 (0.82, 0.82, 0.82)	0	0
	1	(((((Aoe, (Bes, (Mel, Num))), Dor), Bur), (Era, Sar)), Tal);	15	0	0	0	0	0	0	1	0.071 (0.48, 0.48, 0.48)
	1	((Aoe, (((((Bes, Mel), Num), Dor), Bur), (Era, Sar))), Tal);	35	0	0	1	0.077 (0.32, 0.32, 0.32)	0	0	0	0
	2a	(((Aoe, (((Bes, (Mel, Num)), Dor), Bur)), (Era, Sar)), Tal);	5	0	0	1	1.000 (0.56, 0.56, 0.56)	1	1.000 (0.57, 0.57, 0.57)	1	1.000 (0.33, 0.33, 0.33)
	2a	(((Aoe, ((((Bes, Mel), Num), Dor), Bur)), (Era, Sar)), Tal);	26	1	1.000 (0.49, 0.49, 0.49)	0	0	0	0	0	0
	2b	(((Aoe, ((((Bes, Num), Mel), Bur), Dor)), (Era, Sar)), Tal);	2	1	1.000 (0.23, 0.23, 0.23)	1	1.000 (0.13, 0.13, 0.13)	1	1.000 (0.42, 0.42, 0.42)	0	0
	2b	((((Aoe, ((Bes, Num), Mel)), (Bur, Dor)), (Era, Sar)), Tal);	20	0	0	0	0	0	0	1	1.000 (0.19, 0.19, 0.19)
	2c	(((Aoe, (((Bes, (Mel, Num)), Bur), Dor)), (Era, Sar)), Tal);	1	4	0.667 (0.66, 0.82, 0.99)	1	0.250 (0.38, 0.38, 0.38)	3	0.429 (0.44, 0.57, 0.76)	3	0.750 (0.63, 0.69, 0.89)
	2c	(((Aoe, ((((Bes, Num), Mel), Bur), Dor)), (Era, Sar)), Tal);	2	2	0.333 (0.65, 0.71, 0.77)	2	0.500 (0.70, 0.83, 0.96)	2	0.286 (0.48, 0.71, 0.93)	0	0
	2c	(((Aoe, ((((Bes, Mel), Num), Bur), Dor)), (Era, Sar)), Tal);	9	0	0	1	0.250 (0.55, 0.55, 0.55)	1	0.143 (0.19, 0.19, 0.19)	0	0
	2c	(((Aoe, (((Bes, Num), Mel), (Bur, Dor))), (Era, Sar)), Tal);	10	0	0	0	0	1	0.143 (0.93, 0.93, 0.93)	1	0.250 (0.35, 0.35, 0.35)
	3	(((Aoe, (((Bes, (Mel, Num)), Bur), Dor)), (Era, Sar)), Tal);	1	1	0.125 (0.45, 0.45, 0.45)	3	0.600 (0.34, 0.58, 0.81)	1	0.125 (0.69, 0.69, 0.69)	1	0.167 (0.52, 0.52, 0.52)
	3	(((Aoe, ((((Bes, Num), Mel), Bur), Dor)), (Era, Sar)), Tal);	2	3	0.375 (0.62, 0.78, 1.00)	0	0	4	0.500 (0.49, 0.74, 0.99)	3	0.500 (0.37, 0.77, 1.00)
	3	((Aoe, (((((Bes, Num), Mel), Bur), Dor), (Era, Sar))), Tal);	4	0	0	1	0.200 (0.65, 0.65, 0.65)	0	0	0	0
	3	(((Aoe, (((Bes, (Mel, Num)), Dor), Bur)), (Era, Sar)), Tal);	5	2	0.250 (0.55, 0.59, 0.63)	0	0	0	0	1	0.167 (0.32, 0.32, 0.32)
	3	((Aoe, ((((Bes, (Mel, Num)), Bur), Dor), (Era, Sar))), Tal);	6	1	0.125 (0.35, 0.35, 0.35)	0	0	0	0	0	0
	3	(((Aoe, ((((Bes, Mel), Num), Bur), Dor)), (Era, Sar)), Tal);	9	0	0	1	0.200 (0.65, 0.65, 0.65)	1	0.125 (0.32, 0.32, 0.32)	0	0
	3	(((Aoe, (((Bes, Num), Mel), (Bur, Dor))), (Era, Sar)), Tal);	10	0	0	0	0	1	0.125 (0.27, 0.27, 0.27)	0	0
	3	((Aoe, ((((Bes, (Mel, Num)), Dor), Bur), (Era, Sar))), Tal);	12	0	0	0	0	0	0	1	0.167 (0.29, 0.29, 0.29)
	3	(((Aoe, (Era, Sar)), ((((Bes, Num), Mel), Bur), Dor)), Tal);	18	1	0.125 (0.26, 0.26, 0.26)	0	0	0	0	0	0
	3	(((((Aoe, ((Bes, Num), Mel)), Dor), Bur), (Era, Sar)), Tal);	19	0	0	0	0	1	0.125 (0.21, 0.21, 0.21)	0	0
	4	(((Aoe, (((Bes, (Mel, Num)), Bur), Dor)), (Era, Sar)), Tal);	1	1	0.143 (0.65, 0.65, 0.65)	0	0	3	0.429 (0.45, 0.52, 0.65)	1	0.200 (0.83, 0.83, 0.83)
	4	(((Aoe, ((((Bes, Num), Mel), Bur), Dor)), (Era, Sar)), Tal);	2	2	0.286 (0.33, 0.45, 0.57)	2	0.500 (0.58, 0.77, 0.95)	1	0.143 (0.62, 0.62, 0.62)	1	0.200 (0.45, 0.45, 0.45)
	4	(((Aoe, ((((Bes, Num), Mel), Dor), Bur)), (Era, Sar)), Tal);	3	3	0.429 (0.36, 0.51, 0.88)	1	0.250 (0.60, 0.60, 0.60)	2	0.286 (0.36, 0.63, 0.91)	2	0.400 (0.50, 0.70, 0.89)
	4	(((Aoe, (((Bes, (Mel, Num)), Dor), Bur)), (Era, Sar)), Tal);	5	1	0.143 (0.32, 0.32, 0.32)	1	0.250 (0.40, 0.40, 0.40)	0	0	1	0.200 (0.74, 0.74, 0.74)
	4	(((((Aoe, ((Bes, Num), Mel)), Dor), Bur), (Era, Sar)), Tal);	19	0	0	0	0	1	0.143 (0.24, 0.24, 0.24)	0	0
	5	(((Aoe, (((Bes, (Mel, Num)), Bur), Dor)), (Era, Sar)), Tal);	1	3	0.375 (0.44, 0.67, 0.96)	1	0.200 (0.89, 0.89, 0.89)	3	0.375 (0.43, 0.95, 0.95)	2	0.333 (0.59, 0.63, 0.68)
	5	(((Aoe, ((((Bes, Num), Mel), Bur), Dor)), (Era, Sar)), Tal);	2	3	0.375 (0.60, 0.69, 0.72)	3	0.600 (0.33, 0.83, 0.91)	4	0.500 (0.36, 0.70, 0.92)	3	0.500 (0.61, 0.63, 0.67)
	5	(((Aoe, ((((Bes, Num), Mel), Dor), Bur)), (Era, Sar)), Tal);	3	1	0.125 (0.83, 0.83, 0.83)	0	0	1	0.125 (0.63, 0.63, 0.63)	0	0
	5	(((Aoe, (((Bes, (Mel, Num)), Dor), Bur)), (Era, Sar)), Tal);	5	1	0.125 (0.85, 0.85, 0.85)	1	0.200 (0.82, 0.82, 0.82)	0	0	0	0
	5	((((Aoe, ((Bes, (Mel, Num)), Bur)), Dor), (Era, Sar)), Tal);	11	0	0	0	0	0	0	1	0.167 (0.55, 0.55, 0.55)
	6a	(((Aoe, (((Bes, (Mel, Num)), Bur), Dor)), (Era, Sar)), Tal);	1	2	0.200 (0.37, 0.59, 0.81)	3	0.429 (0.26, 0.77, 0.99)	3	0.300 (0.64, 0.76, 0.97)	1	0.143 (0.48, 0.48, 0.48)
	6a	(((Aoe, ((((Bes, Num), Mel), Bur), Dor)), (Era, Sar)), Tal);	2	3	0.300 (0.51, 0.52, 0.59)	1	0.143 (0.57, 0.57, 0.57)	3	0.300 (0.53, 0.76, 0.84)	3	0.429 (0.33, 0.53, 0.70)
	6a	(((Aoe, ((((Bes, Num), Mel), Dor), Bur)), (Era, Sar)), Tal);	3	1	0.100 (0.45, 0.45, 0.45)	1	0.143 (0.47, 0.47, 0.47)	2	0.200 (0.30, 0.57, 0.83)	1	0.143 (0.36, 0.36, 0.36)
	6a	(((Aoe, (((Bes, (Mel, Num)), Dor), Bur)), (Era, Sar)), Tal);	5	1	0.100 (0.27, 0.27, 0.27)	0	0	1	0.100 (0.78, 0.78, 0.78)	0	0
	6a	((Aoe, ((((Bes, (Mel, Num)), Bur), Dor), (Era, Sar))), Tal);	6	0	0	0	0	0	0	1	0.143 (0.69, 0.69, 0.69)
	6a	(((Aoe, ((Bes, (Mel, Num)), (Bur, Dor))), (Era, Sar)), Tal);	7	0	0	1	0.143 (0.27, 0.27, 0.27)	0	0	1	0.143 (0.54, 0.54, 0.54)
	6a	(((Aoe, ((((Bes, Mel), Num), Bur), Dor)), (Era, Sar)), Tal);	9	1	0.100 (0.24, 0.24, 0.24)	0	0	0	0	0	0
	6a	((((Aoe, ((Bes, (Mel, Num)), Dor)), Bur), (Era, Sar)), Tal);	14	0	0	1	0.143 (0.15, 0.15, 0.15)	0	0	0	0
	6a	(((((Aoe, ((Bes, Num), Mel)), Dor), Bur), (Era, Sar)), Tal);	19	0	0	0	0	1	0.100 (0.66, 0.66, 0.66)	0	0
	6a	((Aoe, (((Bes, (Mel, Num)), (Bur, Dor)), (Era, Sar))), Tal);	24	1	0.100 (0.17, 0.17, 0.17)	0	0	0	0	0	0
	6a	(((Aoe, ((((Bes, Mel), Num), Dor), Bur)), (Era, Sar)), Tal);	26	1	0.100 (0.47, 0.47, 0.47)	0	0	0	0	0	0
	6b	(((Aoe, ((((Bes, Num), Mel), Bur), Dor)), (Era, Sar)), Tal);	2	1	1.000 (0.39, 0.39, 0.39)	0	0	1	1.000 (0.14, 0.14, 0.14)	0	0
	6b	((((Aoe, (((Bes, Num), Mel), Bur)), Dor), (Era, Sar)), Tal);	17	0	0	1	1.000 (0.35, 0.35, 0.35)	0	0	1	1.000 (0.18, 0.18, 0.18)
	6c	(((Aoe, ((((Bes, Num), Mel), Bur), Dor)), (Era, Sar)), Tal);	2	1	1.000 (0.51, 0.51, 0.51)	1	1.000 (0.28, 0.28, 0.28)	1	1.000 (0.66, 0.66, 0.66)	1	1.000 (0.31, 0.31, 0.31)
	6d	(((Aoe, ((((Bes, Num), Mel), Bur), Dor)), (Era, Sar)), Tal);	2	0	0	0	0	1	1.000 (0.94, 0.94, 0.94)	1	1.000 (0.44, 0.44, 0.44)
	6d	((Aoe, (((((Bes, Num), Mel), Bur), Dor), (Era, Sar))), Tal);	4	1	1.000 (0.94, 0.94, 0.94)	0	0	0	0	0	0
	6d	((Aoe, ((((Bes, (Mel, Num)), Bur), Dor), (Era, Sar))), Tal);	6	0	0	1	1.000 (0.35, 0.35, 0.35)	0	0	0	0
	7	(((Aoe, (((Bes, (Mel, Num)), Bur), Dor)), (Era, Sar)), Tal);	1	2	0.154 (0.62, 0.66, 0.69)	0	0	5	0.417 (0.34, 0.82, 0.99)	5	0.556 (0.27, 0.79, 0.96)
	7	(((Aoe, ((((Bes, Num), Mel), Bur), Dor)), (Era, Sar)), Tal);	2	3	0.231 (0.49, 0.64, 0.77)	3	0.333 (0.64, 0.75, 0.87)	2	0.167 (0.49, 0.69, 0.88)	1	0.111 (0.98, 0.98, 0.98)
	7	(((Aoe, ((((Bes, Num), Mel), Dor), Bur)), (Era, Sar)), Tal);	3	1	0.077 (0.44, 0.44, 0.44)	1	0.111 (0.68, 0.68, 0.68)	0	0	2	0.222 (0.49, 0.58, 0.67)
	7	((Aoe, (((((Bes, Num), Mel), Bur), Dor), (Era, Sar))), Tal);	4	1	0.077 (0.74, 0.74, 0.74)	1	0.111 (0.92, 0.92, 0.92)	2	0.167 (0.48, 0.60, 0.72)	1	0.111 (0.49, 0.49, 0.49)
	7	(((Aoe, (((Bes, (Mel, Num)), Dor), Bur)), (Era, Sar)), Tal);	5	1	0.077 (0.52, 0.52, 0.52)	1	0.111 (0.46, 0.46, 0.46)	1	0.083 (0.64, 0.64, 0.64)	0	0
	7	((Aoe, ((((Bes, (Mel, Num)), Bur), Dor), (Era, Sar))), Tal);	6	3	0.231 (0.42, 0.58, 0.95)	1	0.111 (0.54, 0.54, 0.54)	2	0.167 (0.49, 0.73, 0.97)	0	0
	7	(((Aoe, (((Bes, Num), Mel), (Bur, Dor))), (Era, Sar)), Tal);	10	0	0	1	0.111 (0.77, 0.77, 0.77)	0	0	0	0
	7	((Aoe, ((((Bes, (Mel, Num)), Dor), Bur), (Era, Sar))), Tal);	12	1	0.077 (0.34, 0.34, 0.34)	0	0	0	0	0	0
	7	((Aoe, ((((Bes, Num), Mel), (Bur, Dor)), (Era, Sar))), Tal);	23	1	0.077 (0.53, 0.53, 0.53)	0	0	0	0	0	0
	7	((Aoe, (((Bes, (Mel, Num)), (Bur, Dor)), (Era, Sar))), Tal);	24	0	0	1	0.111 (0.71, 0.71, 0.71)	0	0	0	0
	8	(((Aoe, (((Bes, (Mel, Num)), Bur), Dor)), (Era, Sar)), Tal);	1	2	0.222 (0.84, 0.91, 0.98)	1	0.167 (0.91, 0.91, 0.91)	4	0.400 (0.39, 0.56, 0.82)	2	0.286 (0.82, 0.88, 0.94)
	8	(((Aoe, ((((Bes, Num), Mel), Bur), Dor)), (Era, Sar)), Tal);	2	3	0.333 (0.43, 0.49, 0.94)	3	0.500 (0.57, 0.70, 0.82)	4	0.400 (0.21, 0.47, 0.57)	2	0.286 (0.33, 0.53, 0.73)
	8	(((Aoe, ((((Bes, Num), Mel), Dor), Bur)), (Era, Sar)), Tal);	3	2	0.222 (0.53, 0.55, 0.56)	1	0.167 (0.62, 0.62, 0.62)	1	0.100 (0.58, 0.58, 0.58)	2	0.286 (0.53, 0.62, 0.70)
	8	((Aoe, (((((Bes, Num), Mel), Bur), Dor), (Era, Sar))), Tal);	4	1	0.111 (0.37, 0.37, 0.37)	0	0	0	0	0	0
	8	(((Aoe, (((Bes, (Mel, Num)), Dor), Bur)), (Era, Sar)), Tal);	5	0	0	0	0	1	0.100 (0.68, 0.68, 0.68)	0	0
	8	(((Aoe, ((((Bes, Mel), Num), Bur), Dor)), (Era, Sar)), Tal);	9	0	0	1	0.167 (0.78, 0.78, 0.78)	0	0	0	0
	8	(((Aoe, (Era, Sar)), ((((Bes, Num), Mel), Bur), Dor)), Tal);	18	1	0.111 (0.39, 0.39, 0.39)	0	0	0	0	0	0
	8	(((((Aoe, ((Bes, Num), Mel)), Dor), Bur), (Era, Sar)), Tal);	19	0	0	0	0	0	0	1	0.143 (0.22, 0.22, 0.22)
	9	(((Aoe, (((Bes, (Mel, Num)), Bur), Dor)), (Era, Sar)), Tal);	1	2	0.333 (0.75, 0.86, 0.97)	3	0.750 (0.69, 0.82, 0.87)	2	0.333 (0.47, 0.56, 0.65)	1	0.250 (0.74, 0.74, 0.74)
	9	(((Aoe, ((((Bes, Num), Mel), Bur), Dor)), (Era, Sar)), Tal);	2	1	0.167 (0.32, 0.32, 0.32)	1	0.250 (0.29, 0.29, 0.29)	3	0.500 (0.64, 0.93, 0.94)	2	0.500 (0.85, 0.86, 0.87)
	9	(((Aoe, ((((Bes, Num), Mel), Dor), Bur)), (Era, Sar)), Tal);	3	0	0	0	0	0	0	1	0.250 (0.73, 0.73, 0.73)
	9	(((Aoe, (((Bes, (Mel, Num)), Dor), Bur)), (Era, Sar)), Tal);	5	2	0.333 (0.41, 0.45, 0.48)	0	0	0	0	0	0
	9	(((Aoe, ((((Bes, Mel), Num), Bur), Dor)), (Era, Sar)), Tal);	9	1	0.167 (0.54, 0.54, 0.54)	0	0	0	0	0	0
	9	(((Aoe, ((((Bes, Mel), Num), Dor), Bur)), (Era, Sar)), Tal);	26	0	0	0	0	1	0.167 (0.64, 0.64, 0.64)	0	0
	10	(((Aoe, (((Bes, (Mel, Num)), Bur), Dor)), (Era, Sar)), Tal);	1	5	0.263 (0.34, 0.45, 0.86)	2	0.154 (0.34, 0.60, 0.86)	6	0.316 (0.38, 0.54, 0.80)	5	0.385 (0.33, 0.69, 0.85)
	10	(((Aoe, ((((Bes, Num), Mel), Bur), Dor)), (Era, Sar)), Tal);	2	4	0.210 (0.51, 0.76, 0.88)	1	0.077 (0.75, 0.75, 0.75)	6	0.316 (0.22, 0.86, 0.95)	2	0.154 (0.53, 0.74, 0.95)
	10	(((Aoe, ((((Bes, Num), Mel), Dor), Bur)), (Era, Sar)), Tal);	3	0	0	1	0.077 (0.14, 0.14, 0.14)	1	0.053 (0.77, 0.77, 0.77)	0	0
	10	((Aoe, (((((Bes, Num), Mel), Bur), Dor), (Era, Sar))), Tal);	4	3	0.158 (0.52, 0.53, 0.95)	2	0.154 (0.56, 0.74, 0.93)	1	0.053 (0.47, 0.47, 0.47)	1	0.077 (0.52, 0.52, 0.52)
	10	(((Aoe, (((Bes, (Mel, Num)), Dor), Bur)), (Era, Sar)), Tal);	5	1	0.053 (0.71, 0.71, 0.71)	0	0	1	0.053 (0.22, 0.22, 0.22)	0	0
	10	((Aoe, ((((Bes, (Mel, Num)), Bur), Dor), (Era, Sar))), Tal);	6	2	0.105 (0.33, 0.39, 0.46)	1	0.077 (0.40, 0.40, 0.40)	0	0	0	0
	10	(((Aoe, ((Bes, (Mel, Num)), (Bur, Dor))), (Era, Sar)), Tal);	7	0	0	0	0	0	0	2	0.154 (0.39, 0.55, 0.70)
	10	((Aoe, (((((Bes, Num), Mel), Dor), Bur), (Era, Sar))), Tal);	8	0	0	1	0.077 (0.58, 0.58, 0.58)	2	0.105 (0.43, 0.55, 0.67)	1	0.077 (0.30, 0.30, 0.30)
	10	(((Aoe, ((((Bes, Mel), Num), Bur), Dor)), (Era, Sar)), Tal);	9	1	0.053 (0.84, 0.84, 0.84)	2	0.154 (0.55, 0.75, 0.94)	0	0	0	0
	10	(((Aoe, (((Bes, Num), Mel), (Bur, Dor))), (Era, Sar)), Tal);	10	1	0.053 (0.64, 0.64, 0.64)	0	0	0	0	1	0.077 (0.42, 0.42, 0.42)
	10	((Aoe, ((((Bes, (Mel, Num)), Dor), Bur), (Era, Sar))), Tal);	12	0	0	1	0.077 (0.63, 0.63, 0.63)	0	0	1	0.077 (0.13, 0.13, 0.13)
	10	((((Aoe, ((Bes, (Mel, Num)), Dor)), Bur), (Era, Sar)), Tal);	14	0	0	0	0	1	0.053 (0.36, 0.36, 0.36)	0	0
	10	((Aoe, ((((Bes, Num), Mel), (Bur, Dor)), (Era, Sar))), Tal);	23	1	0.053 (0.31, 0.31, 0.31)	1	0.077 (0.59, 0.59, 0.59)	0	0	0	0
	10	((Aoe, (((Bes, (Mel, Num)), (Bur, Dor)), (Era, Sar))), Tal);	24	0	0	1	0.077 (0.31, 0.31, 0.31)	0	0	0	0
	10	((Aoe, (((((Bes, Mel), Num), Dor), Bur), (Era, Sar))), Tal);	35	1	0.053 (0.18, 0.18, 0.18)	0	0	0	0	0	0
	10	(((Aoe, (((Bes, Mel), Num), (Bur, Dor))), (Era, Sar)), Tal);	43	0	0	0	0	1	0.053 (0.97, 0.97, 0.97)	0	0
	11	(((Aoe, (((Bes, (Mel, Num)), Bur), Dor)), (Era, Sar)), Tal);	1	1	0.067 (0.82, 0.82, 0.82)	0	0	4	0.267 (0.20, 0.55, 0.80)	3	0.273 (0.28, 0.64, 0.71)
	11	(((Aoe, ((((Bes, Num), Mel), Bur), Dor)), (Era, Sar)), Tal);	2	8	0.533 (0.51, 0.70, 0.97)	6	0.600 (0.35, 0.93, 0.99)	9	0.600 (0.28, 0.90, 0.98)	5	0.455 (0.51, 0.87, 1.00)
	11	(((Aoe, ((((Bes, Num), Mel), Dor), Bur)), (Era, Sar)), Tal);	3	2	0.133 (0.37, 0.40, 0.42)	1	0.100 (0.54, 0.54, 0.54)	2	0.133 (0.58, 0.67, 0.76)	1	0.091 (0.70, 0.70, 0.70)
	11	((Aoe, (((((Bes, Num), Mel), Bur), Dor), (Era, Sar))), Tal);	4	1	0.067 (0.63, 0.63, 0.63)	0	0	0	0	0	0
	11	(((Aoe, (((Bes, (Mel, Num)), Dor), Bur)), (Era, Sar)), Tal);	5	2	0.133 (0.55, 0.67, 0.79)	1	0.100 (0.35, 0.35, 0.35)	0	0	1	0.091 (0.75, 0.75, 0.75)
	11	((Aoe, ((((Bes, (Mel, Num)), Bur), Dor), (Era, Sar))), Tal);	6	1	0.067 (0.21, 0.21, 0.21)	1	0.100 (0.48, 0.48, 0.48)	0	0	0	0
	11	(((Aoe, (((Bes, Num), Mel), (Bur, Dor))), (Era, Sar)), Tal);	10	0	0	1	0.100 (0.45, 0.45, 0.45)	0	0	0	0
	11	(((((Aoe, (Bes, (Mel, Num))), Bur), Dor), (Era, Sar)), Tal);	16	0	0	0	0	0	0	1	0.091 (0.28, 0.28, 0.28)
	12	(((Aoe, (((Bes, (Mel, Num)), Bur), Dor)), (Era, Sar)), Tal);	1	4	0.235 (0.68, 0.81, 0.94)	3	0.273 (0.77, 0.80, 0.89)	3	0.176 (0.58, 0.88, 0.91)	1	0.091 (0.75, 0.75, 0.75)
	12	(((Aoe, ((((Bes, Num), Mel), Bur), Dor)), (Era, Sar)), Tal);	2	9	0.529 (0.35, 0.71, 0.98)	4	0.364 (0.43, 0.68, 0.87)	9	0.529 (0.40, 0.76, 0.95)	7	0.636 (0.54, 0.68, 0.99)
	12	(((Aoe, ((((Bes, Num), Mel), Dor), Bur)), (Era, Sar)), Tal);	3	0	0	2	0.182 (0.56, 0.60, 0.64)	2	0.118 (0.26, 0.56, 0.85)	1	0.091 (0.73, 0.73, 0.73)
	12	((Aoe, (((((Bes, Num), Mel), Bur), Dor), (Era, Sar))), Tal);	4	0	0	1	0.091 (0.93, 0.93, 0.93)	1	0.059 (0.54, 0.54, 0.54)	0	0
	12	(((Aoe, (((Bes, (Mel, Num)), Dor), Bur)), (Era, Sar)), Tal);	5	0	0	0	0	1	0.059 (0.42, 0.42, 0.42)	2	0.182 (0.27, 0.47, 0.68)
	12	((Aoe, ((((Bes, (Mel, Num)), Bur), Dor), (Era, Sar))), Tal);	6	1	0.059 (0.88, 0.88, 0.88)	0	0	0	0	0	0
	12	(((Aoe, ((Bes, (Mel, Num)), (Bur, Dor))), (Era, Sar)), Tal);	7	0	0	0	0	1	0.059 (0.18, 0.18, 0.18)	0	0
	12	((Aoe, (((((Bes, Num), Mel), Dor), Bur), (Era, Sar))), Tal);	8	1	0.059 (0.92, 0.92, 0.92)	1	0.091 (0.72, 0.72, 0.72)	0	0	0	0
	12	(((Aoe, (((Bes, Num), Mel), (Bur, Dor))), (Era, Sar)), Tal);	10	2	0.118 (0.68, 0.83, 0.99)	0	0	0	0	0	0
	13a	(((Aoe, (((Bes, (Mel, Num)), Bur), Dor)), (Era, Sar)), Tal);	1	2	0.133 (0.50, 0.56, 0.63)	2	0.200 (0.65, 0.65, 0.65)	3	0.200 (0.43, 0.69, 0.70)	1	0.100 (0.43, 0.43, 0.43)
	13a	(((Aoe, ((((Bes, Num), Mel), Bur), Dor)), (Era, Sar)), Tal);	2	4	0.267 (0.42, 0.59, 0.84)	4	0.400 (0.63, 0.74, 0.88)	4	0.267 (0.53, 0.76, 0.82)	4	0.400 (0.24, 0.59, 0.92)
	13a	(((Aoe, ((((Bes, Num), Mel), Dor), Bur)), (Era, Sar)), Tal);	3	2	0.133 (0.29, 0.38, 0.47)	1	0.100 (0.27, 0.27, 0.27)	3	0.200 (0.29, 0.57, 0.75)	2	0.200 (0.27, 0.36, 0.45)
	13a	((Aoe, (((((Bes, Num), Mel), Bur), Dor), (Era, Sar))), Tal);	4	3	0.200 (0.53, 0.60, 0.63)	2	0.200 (0.44, 0.66, 0.88)	2	0.133 (0.40, 0.47, 0.55)	1	0.100 (0.74, 0.74, 0.74)
	13a	(((Aoe, (((Bes, (Mel, Num)), Dor), Bur)), (Era, Sar)), Tal);	5	1	0.067 (0.56, 0.56, 0.56)	1	0.100 (0.31, 0.31, 0.31)	0	0	0	0
	13a	(((Aoe, ((Bes, (Mel, Num)), (Bur, Dor))), (Era, Sar)), Tal);	7	0	0	0	0	2	0.133 (0.46, 0.46, 0.46)	1	0.100 (0.48, 0.48, 0.48)
	13a	((Aoe, (((((Bes, Num), Mel), Dor), Bur), (Era, Sar))), Tal);	8	2	0.133 (0.32, 0.37, 0.41)	0	0	0	0	0	0
	13a	((Aoe, ((((Bes, (Mel, Num)), Dor), Bur), (Era, Sar))), Tal);	12	1	0.067 (0.52, 0.52, 0.52)	0	0	0	0	1	0.100 (0.38, 0.38, 0.38)
	13a	(((((Aoe, ((Bes, Num), Mel)), Bur), Dor), (Era, Sar)), Tal);	27	0	0	0	0	1	0.067 (0.26, 0.26, 0.26)	0	0
	13b	(((Aoe, ((Bes, Num), Mel)), ((Bur, Dor), (Era, Sar))), Tal);	22	1	1.000 (0.14, 0.14, 0.14)	1	1.000 (0.14, 0.14, 0.14)	0	0	0	0
	13b	(((Aoe, (Bes, (Mel, Num))), ((Bur, Dor), (Era, Sar))), Tal);	33	0	0	0	0	1	1.000 (0.15, 0.15, 0.15)	1	1.000 (0.18, 0.18, 0.18)
	13c	((Aoe, (((((Bes, Num), Mel), Dor), Bur), (Era, Sar))), Tal);	8	0	0	1	1.000 (0.38, 0.38, 0.38)	1	1.000 (0.71, 0.71, 0.71)	1	1.000 (0.41, 0.41, 0.41)
	13c	((Aoe, ((((Bes, (Mel, Num)), Dor), Bur), (Era, Sar))), Tal);	12	1	1.000 (0.25, 0.25, 0.25)	0	0	0	0	0	0
	14	(((Aoe, (((Bes, (Mel, Num)), Bur), Dor)), (Era, Sar)), Tal);	1	3	0.375 (0.36, 0.41, 0.78)	2	0.400 (0.82, 0.90, 0.98)	0	0	0	0
	14	(((Aoe, ((((Bes, Num), Mel), Bur), Dor)), (Era, Sar)), Tal);	2	3	0.375 (0.76, 0.80, 0.81)	2	0.400 (0.38, 0.55, 0.72)	4	0.500 (0.27, 0.52, 0.87)	3	0.500 (0.55, 0.57, 0.84)
	14	(((Aoe, ((((Bes, Num), Mel), Dor), Bur)), (Era, Sar)), Tal);	3	1	0.125 (0.96, 0.96, 0.96)	1	0.200 (0.55, 0.55, 0.55)	2	0.250 (0.31, 0.41, 0.50)	1	0.167 (0.41, 0.41, 0.41)
	14	(((Aoe, (((Bes, (Mel, Num)), Dor), Bur)), (Era, Sar)), Tal);	5	1	0.125 (1.00, 1.00, 1.00)	0	0	2	0.250 (0.48, 0.70, 0.93)	2	0.333 (0.28, 0.39, 0.50)
	15	(((Aoe, (((Bes, (Mel, Num)), Bur), Dor)), (Era, Sar)), Tal);	1	3	0.333 (0.51, 0.83, 0.95)	3	0.500 (0.75, 0.85, 0.86)	4	0.444 (0.48, 0.62, 0.87)	3	0.500 (0.38, 0.64, 0.94)
	15	(((Aoe, ((((Bes, Num), Mel), Bur), Dor)), (Era, Sar)), Tal);	2	4	0.444 (0.29, 0.85, 1.00)	3	0.500 (0.85, 0.94, 1.00)	4	0.444 (0.50, 0.59, 0.62)	1	0.167 (0.95, 0.95, 0.95)
	15	(((Aoe, ((((Bes, Num), Mel), Dor), Bur)), (Era, Sar)), Tal);	3	1	0.111 (0.43, 0.43, 0.43)	0	0	0	0	0	0
	15	(((Aoe, (((Bes, (Mel, Num)), Dor), Bur)), (Era, Sar)), Tal);	5	1	0.111 (0.44, 0.44, 0.44)	0	0	0	0	0	0
	15	(((Aoe, ((Bes, (Mel, Num)), (Bur, Dor))), (Era, Sar)), Tal);	7	0	0	0	0	1	0.111 (0.45, 0.45, 0.45)	0	0
	15	(((Aoe, ((((Bes, Mel), Num), Bur), Dor)), (Era, Sar)), Tal);	9	0	0	0	0	0	0	1	0.167 (0.43, 0.43, 0.43)
	15	((((Aoe, (((Bes, Num), Mel), Bur)), Dor), (Era, Sar)), Tal);	17	0	0	0	0	0	0	1	0.167 (0.56, 0.56, 0.56)
	16	(((Aoe, (((Bes, (Mel, Num)), Bur), Dor)), (Era, Sar)), Tal);	1	3	0.429 (0.43, 0.58, 0.92)	2	0.400 (0.35, 0.56, 0.76)	2	0.286 (0.25, 0.29, 0.33)	2	0.400 (0.52, 0.55, 0.58)
	16	(((Aoe, ((((Bes, Num), Mel), Bur), Dor)), (Era, Sar)), Tal);	2	1	0.143 (0.95, 0.95, 0.95)	1	0.200 (0.39, 0.39, 0.39)	1	0.143 (0.32, 0.32, 0.32)	1	0.200 (0.51, 0.51, 0.51)
	16	(((Aoe, ((((Bes, Num), Mel), Dor), Bur)), (Era, Sar)), Tal);	3	0	0	1	0.200 (0.57, 0.57, 0.57)	2	0.286 (0.08, 0.26, 0.43)	0	0
	16	(((Aoe, (((Bes, (Mel, Num)), Dor), Bur)), (Era, Sar)), Tal);	5	2	0.286 (0.58, 0.72, 0.87)	1	0.200 (0.16, 0.16, 0.16)	2	0.286 (0.47, 0.62, 0.77)	1	0.200 (0.61, 0.61, 0.61)
	16	((Aoe, (((((Bes, Num), Mel), Dor), Bur), (Era, Sar))), Tal);	8	0	0	0	0	0	0	1	0.200 (0.47, 0.47, 0.47)
	16	(((Aoe, (Era, Sar)), (((Bes, (Mel, Num)), Bur), Dor)), Tal);	21	1	0.143 (0.28, 0.28, 0.28)	0	0	0	0	0	0
	17	(((Aoe, (((Bes, (Mel, Num)), Bur), Dor)), (Era, Sar)), Tal);	1	4	0.267 (0.49, 0.60, 0.86)	1	0.100 (0.47, 0.47, 0.47)	5	0.333 (0.37, 0.50, 0.81)	1	0.100 (0.80, 0.80, 0.80)
	17	(((Aoe, ((((Bes, Num), Mel), Bur), Dor)), (Era, Sar)), Tal);	2	6	0.400 (0.25, 0.40, 0.72)	2	0.200 (0.50, 0.69, 0.88)	5	0.333 (0.41, 0.68, 0.98)	3	0.300 (0.79, 0.82, 0.93)
	17	(((Aoe, ((((Bes, Num), Mel), Dor), Bur)), (Era, Sar)), Tal);	3	1	0.067 (0.24, 0.24, 0.24)	1	0.100 (0.60, 0.60, 0.60)	3	0.200 (0.53, 0.63, 0.66)	2	0.200 (0.66, 0.69, 0.73)
	17	((Aoe, (((((Bes, Num), Mel), Bur), Dor), (Era, Sar))), Tal);	4	2	0.133 (0.61, 0.65, 0.70)	4	0.400 (0.53, 0.71, 0.92)	0	0	1	0.100 (0.91, 0.91, 0.91)
	17	(((Aoe, (((Bes, (Mel, Num)), Dor), Bur)), (Era, Sar)), Tal);	5	0	0	1	0.100 (0.57, 0.57, 0.57)	0	0	1	0.100 (0.52, 0.52, 0.52)
	17	((Aoe, ((((Bes, (Mel, Num)), Bur), Dor), (Era, Sar))), Tal);	6	1	0.067 (0.86, 0.86, 0.86)	0	0	1	0.067 (0.72, 0.72, 0.72)	0	0
	17	(((Aoe, ((Bes, (Mel, Num)), (Bur, Dor))), (Era, Sar)), Tal);	7	0	0	0	0	0	0	1	0.100 (0.32, 0.32, 0.32)
	17	(((Aoe, (((Bes, Num), Mel), (Bur, Dor))), (Era, Sar)), Tal);	10	0	0	1	0.100 (0.51, 0.51, 0.51)	0	0	0	0
	17	((((Aoe, ((Bes, (Mel, Num)), Dor)), Bur), (Era, Sar)), Tal);	14	1	0.067 (0.77, 0.77, 0.77)	0	0	1	0.067 (0.96, 0.96, 0.96)	1	0.100 (0.93, 0.93, 0.93)
	18	(((Aoe, (((Bes, (Mel, Num)), Bur), Dor)), (Era, Sar)), Tal);	1	3	0.231 (0.45, 0.49, 0.81)	4	0.500 (0.43, 0.49, 0.85)	3	0.231 (0.63, 0.68, 0.75)	2	0.222 (0.90, 0.91, 0.93)
	18	(((Aoe, ((((Bes, Num), Mel), Bur), Dor)), (Era, Sar)), Tal);	2	2	0.154 (0.73, 0.77, 0.81)	1	0.125 (0.65, 0.65, 0.65)	5	0.385 (0.76, 0.85, 0.95)	4	0.444 (0.52, 0.83, 0.98)
	18	(((Aoe, ((((Bes, Num), Mel), Dor), Bur)), (Era, Sar)), Tal);	3	0	0	1	0.125 (0.65, 0.65, 0.65)	1	0.077 (0.51, 0.51, 0.51)	0	0
	18	((Aoe, (((((Bes, Num), Mel), Bur), Dor), (Era, Sar))), Tal);	4	2	0.154 (0.48, 0.74, 1.00)	1	0.125 (0.49, 0.49, 0.49)	0	0	0	0
	18	(((Aoe, (((Bes, (Mel, Num)), Dor), Bur)), (Era, Sar)), Tal);	5	3	0.231 (0.49, 0.58, 0.58)	0	0	0	0	2	0.222 (0.32, 0.41, 0.50)
	18	((Aoe, ((((Bes, (Mel, Num)), Bur), Dor), (Era, Sar))), Tal);	6	0	0	0	0	1	0.077 (0.50, 0.50, 0.50)	0	0
	18	(((Aoe, ((Bes, (Mel, Num)), (Bur, Dor))), (Era, Sar)), Tal);	7	1	0.077 (0.59, 0.59, 0.59)	1	0.125 (0.59, 0.59, 0.59)	0	0	0	0
	18	(((Aoe, ((((Bes, Mel), Num), Bur), Dor)), (Era, Sar)), Tal);	9	1	0.077 (0.81, 0.81, 0.81)	0	0	0	0	0	0
	18	(((Aoe, (((Bes, Num), Mel), (Bur, Dor))), (Era, Sar)), Tal);	10	1	0.077 (0.40, 0.40, 0.40)	0	0	2	0.154 (0.39, 0.49, 0.59)	0	0
	18	(((((Aoe, (Bes, (Mel, Num))), Dor), Bur), (Era, Sar)), Tal);	15	0	0	0	0	1	0.077 (0.76, 0.76, 0.76)	1	0.111 (0.84, 0.84, 0.84)
	19	(((Aoe, (((Bes, (Mel, Num)), Bur), Dor)), (Era, Sar)), Tal);	1	2	0.143 (0.67, 0.79, 0.90)	2	0.200 (0.41, 0.56, 0.71)	5	0.333 (0.29, 0.50, 0.93)	3	0.273 (0.40, 0.56, 0.88)
	19	(((Aoe, ((((Bes, Num), Mel), Bur), Dor)), (Era, Sar)), Tal);	2	6	0.429 (0.44, 0.68, 0.94)	4	0.400 (0.69, 0.83, 1.00)	6	0.400 (0.44, 0.69, 0.96)	4	0.364 (0.57, 0.66, 0.80)
	19	(((Aoe, ((((Bes, Num), Mel), Dor), Bur)), (Era, Sar)), Tal);	3	4	0.286 (0.32, 0.38, 0.88)	3	0.300 (0.63, 0.65, 0.81)	2	0.133 (0.47, 0.50, 0.54)	2	0.182 (0.45, 0.47, 0.49)
	19	(((Aoe, (((Bes, (Mel, Num)), Dor), Bur)), (Era, Sar)), Tal);	5	0	0	0	0	1	0.067 (0.66, 0.66, 0.66)	0	0
	19	(((Aoe, ((Bes, (Mel, Num)), (Bur, Dor))), (Era, Sar)), Tal);	7	0	0	0	0	1	0.067 (0.18, 0.18, 0.18)	0	0
	19	(((Aoe, ((((Bes, Mel), Num), Bur), Dor)), (Era, Sar)), Tal);	9	1	0.071 (0.48, 0.48, 0.48)	0	0	0	0	0	0
	19	(((((Aoe, (Bes, (Mel, Num))), Dor), Bur), (Era, Sar)), Tal);	15	0	0	0	0	0	0	1	0.091 (0.17, 0.17, 0.17)
	19	(((Aoe, (Era, Sar)), ((((Bes, Num), Mel), Bur), Dor)), Tal);	18	1	0.071 (0.67, 0.67, 0.67)	0	0	0	0	0	0
	19	(((((Aoe, Dor), ((Bes, Num), Mel)), Bur), (Era, Sar)), Tal);	38	0	0	0	0	0	0	1	0.091 (0.35, 0.35, 0.35)
	19	((((Aoe, (((Bes, Mel), Num), Dor)), Bur), (Era, Sar)), Tal);	39	0	0	1	0.100 (0.11, 0.11, 0.11)	0	0	0	0
	20	(((Aoe, (((Bes, (Mel, Num)), Bur), Dor)), (Era, Sar)), Tal);	1	4	0.235 (0.43, 0.54, 0.84)	0	0	1	0.059 (0.65, 0.65, 0.65)	3	0.250 (0.29, 0.59, 0.99)
	20	(((Aoe, ((((Bes, Num), Mel), Bur), Dor)), (Era, Sar)), Tal);	2	5	0.294 (0.21, 0.40, 0.90)	3	0.250 (0.35, 0.65, 0.74)	4	0.235 (0.51, 0.57, 0.88)	4	0.333 (0.36, 0.58, 0.79)
	20	(((Aoe, ((((Bes, Num), Mel), Dor), Bur)), (Era, Sar)), Tal);	3	0	0	0	0	5	0.294 (0.34, 0.61, 0.87)	1	0.083 (0.71, 0.71, 0.71)
	20	((Aoe, (((((Bes, Num), Mel), Bur), Dor), (Era, Sar))), Tal);	4	1	0.059 (0.40, 0.40, 0.40)	4	0.333 (0.34, 0.55, 0.75)	1	0.059 (0.54, 0.54, 0.54)	0	0
	20	(((Aoe, (((Bes, (Mel, Num)), Dor), Bur)), (Era, Sar)), Tal);	5	0	0	1	0.083 (0.41, 0.41, 0.41)	1	0.059 (0.42, 0.42, 0.42)	0	0
	20	((Aoe, ((((Bes, (Mel, Num)), Bur), Dor), (Era, Sar))), Tal);	6	2	0.118 (0.53, 0.77, 1.00)	2	0.167 (0.86, 0.93, 1.00)	2	0.118 (0.60, 0.80, 1.00)	2	0.167 (0.48, 0.74, 1.00)
	20	(((Aoe, ((Bes, (Mel, Num)), (Bur, Dor))), (Era, Sar)), Tal);	7	0	0	1	0.083 (0.40, 0.40, 0.40)	1	0.059 (0.52, 0.52, 0.52)	1	0.083 (0.18, 0.18, 0.18)
	20	((Aoe, (((((Bes, Num), Mel), Dor), Bur), (Era, Sar))), Tal);	8	3	0.176 (0.45, 0.71, 0.84)	1	0.083 (0.54, 0.54, 0.54)	0	0	0	0
	20	(((Aoe, ((((Bes, Mel), Num), Bur), Dor)), (Era, Sar)), Tal);	9	1	0.059 (0.75, 0.75, 0.75)	0	0	0	0	0	0
	20	(((Aoe, (((Bes, Num), Mel), (Bur, Dor))), (Era, Sar)), Tal);	10	0	0	0	0	1	0.059 (0.27, 0.27, 0.27)	1	0.083 (0.69, 0.69, 0.69)
	20	((Aoe, ((((Bes, (Mel, Num)), Dor), Bur), (Era, Sar))), Tal);	12	1	0.059 (0.30, 0.30, 0.30)	0	0	0	0	0	0
	20	((Aoe, (((((Bes, Mel), Num), Bur), Dor), (Era, Sar))), Tal);	34	0	0	0	0	1	0.059 (0.51, 0.51, 0.51)	0	0
	21a	(((Aoe, ((((Bes, Num), Mel), Bur), Dor)), (Era, Sar)), Tal);	2	3	0.375 (0.50, 0.60, 0.99)	2	0.333 (0.79, 0.84, 0.90)	4	0.500 (0.93, 0.98, 1.00)	3	0.600 (0.94, 0.99, 1.00)
	21a	((Aoe, (((((Bes, Num), Mel), Bur), Dor), (Era, Sar))), Tal);	4	5	0.625 (0.48, 0.98, 1.00)	3	0.500 (0.62, 0.71, 0.78)	4	0.500 (0.63, 0.88, 1.00)	2	0.400 (0.72, 0.80, 0.89)
	21a	((Aoe, (((((Bes, Num), Mel), Dor), Bur), (Era, Sar))), Tal);	8	0	0	1	0.167 (0.69, 0.69, 0.69)	0	0	0	0
	21b	((Aoe, (((((Bes, Num), Mel), Bur), Dor), (Era, Sar))), Tal);	4	1	1.000 (0.60, 0.60, 0.60)	0	0	1	1.000 (0.64, 0.64, 0.64)	0	0
	21b	((Aoe, (((((Bes, Num), Mel), Bur), (Era, Sar)), Dor)), Tal);	13	0	0	1	1.000 (0.62, 0.62, 0.62)	0	0	1	1.000 (0.35, 0.35, 0.35)
	21c	(((Aoe, ((((Bes, Num), Mel), Bur), Dor)), (Era, Sar)), Tal);	2	3	1.000 (0.79, 0.86, 0.98)	2	1.000 (0.92, 0.94, 0.95)	3	1.000 (0.70, 0.96, 1.00)	2	1.000 (0.85, 0.90, 0.95)
Noncoding	1	(((Aoe, (((Bes, (Mel, Num)), Bur), Dor)), (Era, Sar)), Tal);	1	3	0.429 (0.57, 0.57, 0.61)	1	0.200 (0.35, 0.35, 0.35)	5	0.417 (0.72, 0.97, 0.98)	3	0.333 (0.58, 0.70, 0.76)
	1	(((Aoe, ((((Bes, Num), Mel), Bur), Dor)), (Era, Sar)), Tal);	2	2	0.286 (0.34, 0.60, 0.86)	1	0.200 (0.30, 0.30, 0.30)	1	0.083 (0.46, 0.46, 0.46)	1	0.111 (0.74, 0.74, 0.74)
	1	(((Aoe, ((((Bes, Num), Mel), Dor), Bur)), (Era, Sar)), Tal);	3	0	0	0	0	1	0.083 (0.42, 0.42, 0.42)	1	0.111 (0.44, 0.44, 0.44)
	1	((Aoe, (((((Bes, Num), Mel), Bur), Dor), (Era, Sar))), Tal);	4	1	0.143 (0.73, 0.73, 0.73)	0	0	0	0	0	0
	1	((Aoe, ((((Bes, (Mel, Num)), Bur), Dor), (Era, Sar))), Tal);	6	1	0.143 (0.20, 0.20, 0.20)	1	0.200 (0.56, 0.56, 0.56)	3	0.250 (0.21, 0.39, 0.47)	1	0.111 (0.24, 0.24, 0.24)
	1	((((Aoe, ((Bes, (Mel, Num)), Bur)), Dor), (Era, Sar)), Tal);	11	0	0	0	0	1	0.083 (0.44, 0.44, 0.44)	1	0.111 (0.51, 0.51, 0.51)
	1	((Aoe, ((((Bes, (Mel, Num)), Dor), Bur), (Era, Sar))), Tal);	12	0	0	1	0.200 (0.42, 0.42, 0.42)	0	0	0	0
	1	(((((Aoe, (Bes, (Mel, Num))), Bur), Dor), (Era, Sar)), Tal);	16	0	0	0	0	0	0	1	0.111 (0.40, 0.40, 0.40)
	1	((((Aoe, ((Bes, Num), Mel)), (Bur, Dor)), (Era, Sar)), Tal);	20	0	0	1	0.200 (0.13, 0.13, 0.13)	0	0	0	0
	1	((((Aoe, (Bes, (Mel, Num))), (Bur, Dor)), (Era, Sar)), Tal);	40	0	0	0	0	1	0.083 (0.30, 0.30, 0.30)	0	0
	1	((Aoe, (((Bes, (Mel, Num)), (Era, Sar)), (Bur, Dor))), Tal);	54	0	0	0	0	0	0	1	0.111 (0.06, 0.06, 0.06)
	2a	(((Aoe, (((Bes, (Mel, Num)), Bur), Dor)), (Era, Sar)), Tal);	1	1	1.000 (0.42, 0.42, 0.42)	n/a	n/a	1	1.000 (0.75, 0.75, 0.75)	0	0
	2a	((((Aoe, ((Bes, (Mel, Num)), Bur)), Dor), (Era, Sar)), Tal);	11	0	0	n/a	n/a	0	0	1	1.000 (0.38, 0.38, 0.38)
	2b	(((((Aoe, ((Bes, Num), Mel)), Dor), Bur), (Era, Sar)), Tal);	19	0	0	n/a	n/a	1	1.000 (0.07, 0.07, 0.07)	0	0
	2b	((((Aoe, (((Bes, Num), Mel), Dor)), Bur), (Era, Sar)), Tal);	25	1	1.000 (0.14, 0.14, 0.14)	n/a	n/a	0	0	0	0
	2b	(((Aoe, ((((Bes, Num), Mel), (Era, Sar)), Bur)), Tal), Dor);	42	0	0	n/a	n/a	0	0	1	1.000 (0.01, 0.01, 0.01)
	2c	(((Aoe, (((Bes, (Mel, Num)), Bur), Dor)), (Era, Sar)), Tal);	1	0	0	n/a	n/a	0	0	1	0.500 (0.36, 0.36, 0.36)
	2c	(((Aoe, ((((Bes, Num), Mel), Bur), Dor)), (Era, Sar)), Tal);	2	0	0	n/a	n/a	2	1.000 (0.50, 0.61, 0.73)	0	0
	2c	((Aoe, (((((Bes, Num), Mel), Bur), Dor), (Era, Sar))), Tal);	4	1	0.500 (0.62, 0.62, 0.62)	n/a	n/a	0	0	0	0
	2c	(((Aoe, (((Bes, Num), Mel), (Bur, Dor))), (Era, Sar)), Tal);	10	1	0.500 (0.10, 0.10, 0.10)	n/a	n/a	0	0	0	0
	2c	((((Aoe, (((Bes, Num), Mel), Bur)), Dor), (Era, Sar)), Tal);	17	0	0	n/a	n/a	0	0	1	0.500 (0.62, 0.62, 0.62)
	2	(((Aoe, ((((Bes, Num), Mel), Bur), Dor)), (Era, Sar)), Tal);	2	n/a	n/a	1	1.000 (0.53, 0.53, 0.53)	n/a	n/a	n/a	n/a
	3	(((Aoe, (((Bes, (Mel, Num)), Bur), Dor)), (Era, Sar)), Tal);	1	2	0.667 (0.56, 0.76, 0.96)	1	1.000 (0.79, 0.79, 0.79)	6	0.857 (0.62, 0.78, 0.97)	4	0.800 (0.69, 0.71, 0.82)
	3	(((Aoe, ((((Bes, Num), Mel), Dor), Bur)), (Era, Sar)), Tal);	3	0	0	0	0	1	0.143 (0.29, 0.29, 0.29)	1	0.200 (0.24, 0.24, 0.24)
	3	((Aoe, (((Bes, (Mel, Num)), Bur), (Dor, (Era, Sar)))), Tal);	55	1	0.333 (0.23, 0.23, 0.23)	0	0	0	0	0	0
	4	(((Aoe, (((Bes, (Mel, Num)), Bur), Dor)), (Era, Sar)), Tal);	1	1	0.333 (0.68, 0.68, 0.68)	1	1.000 (0.30, 0.30, 0.30)	3	0.500 (0.47, 0.59, 0.73)	1	0.250 (0.30, 0.30, 0.30)
	4	((Aoe, ((((Bes, (Mel, Num)), Dor), Bur), (Era, Sar))), Tal);	12	1	0.333 (0.56, 0.56, 0.56)	0	0	0	0	0	0
	4	((((Aoe, ((Bes, (Mel, Num)), Dor)), Bur), (Era, Sar)), Tal);	14	0	0	0	0	2	0.333 (0.42, 0.44, 0.47)	0	0
	4	(((((Aoe, (Bes, (Mel, Num))), Dor), Bur), (Era, Sar)), Tal);	15	0	0	0	0	0	0	1	0.250 (0.76, 0.76, 0.76)
	4	(((((Aoe, (Bes, (Mel, Num))), Bur), Dor), (Era, Sar)), Tal);	16	0	0	0	0	1	0.167 (0.50, 0.50, 0.50)	1	0.250 (0.32, 0.32, 0.32)
	4	((((Aoe, (((Bes, Num), Mel), Dor)), Bur), (Era, Sar)), Tal);	25	0	0	0	0	0	0	1	0.250 (0.37, 0.37, 0.37)
	4	((Aoe, ((((Bes, (Mel, Num)), (Era, Sar)), Dor), Bur)), Tal);	53	1	0.333 (0.21, 0.21, 0.21)	0	0	0	0	0	0
	5	(((Aoe, (((Bes, (Mel, Num)), Bur), Dor)), (Era, Sar)), Tal);	1	1	0.250 (0.97, 0.97, 0.97)	2	1.000 (0.56, 0.69, 0.81)	5	0.833 (0.64, 0.70, 0.87)	2	0.500 (0.78, 0.84, 0.89)
	5	(((Aoe, ((((Bes, Num), Mel), Bur), Dor)), (Era, Sar)), Tal);	2	2	0.500 (0.43, 0.52, 0.61)	0	0	1	0.167 (0.22, 0.22, 0.22)	1	0.250 (0.53, 0.53, 0.53)
	5	(((Aoe, (((Bes, (Mel, Num)), Dor), Bur)), (Era, Sar)), Tal);	5	1	0.250 (0.19, 0.19, 0.19)	0	0	0	0	1	0.250 (0.70, 0.70, 0.70)
	6a	(((Aoe, (((Bes, (Mel, Num)), Bur), Dor)), (Era, Sar)), Tal);	1	2	0.400 (0.44, 0.57, 0.69)	1	0.333 (0.31, 0.31, 0.31)	5	0.714 (0.30, 0.63, 0.85)	3	0.600 (0.50, 0.59, 0.79)
	6a	(((Aoe, ((((Bes, Num), Mel), Bur), Dor)), (Era, Sar)), Tal);	2	0	0	0	0	0	0	1	0.200 (0.64, 0.64, 0.64)
	6a	(((Aoe, ((((Bes, Num), Mel), Dor), Bur)), (Era, Sar)), Tal);	3	1	0.200 (0.66, 0.66, 0.66)	1	0.333 (0.74, 0.74, 0.74)	0	0	0	0
	6a	((Aoe, (((((Bes, Num), Mel), Bur), Dor), (Era, Sar))), Tal);	4	0	0	1	0.333 (0.20, 0.20, 0.20)	0	0	0	0
	6a	(((Aoe, (((Bes, (Mel, Num)), Dor), Bur)), (Era, Sar)), Tal);	5	0	0	0	0	2	0.286 (0.41, 0.52, 0.63)	0	0
	6a	((((Aoe, ((Bes, (Mel, Num)), Bur)), Dor), (Era, Sar)), Tal);	11	1	0.200 (0.38, 0.38, 0.38)	0	0	0	0	1	0.200 (0.54, 0.54, 0.54)
	6a	((Aoe, ((((Bes, (Mel, Num)), Dor), Bur), (Era, Sar))), Tal);	12	1	0.200 (0.46, 0.46, 0.46)	0	0	0	0	0	0
	6b	(((Aoe, (((Bes, (Mel, Num)), Bur), Dor)), (Era, Sar)), Tal);	1	1	1.000 (0.06, 0.06, 0.06)	0	0	1	1.000 (0.15, 0.15, 0.15)	0	0
	6b	((((Aoe, ((Bes, (Mel, Num)), Bur)), (Era, Sar)), Dor), Tal);	28	0	0	0	0	0	0	1	1.000 (0.08, 0.08, 0.08)
	6b	((((Aoe, (Era, Sar)), (((Bes, Mel), Num), Bur)), Dor), Tal);	41	0	0	1	1.000 (0.04, 0.04, 0.04)	0	0	0	0
	6c	((((Aoe, Dor), (((Bes, Num), Mel), Bur)), (Era, Sar)), Tal);	29	1	1.000 (0.58, 0.58, 0.58)	1	1.000 (0.26, 0.26, 0.26)	0	0	0	0
	6c	(((Aoe, ((((Bes, Num), Mel), (Era, Sar)), Bur)), Dor), Tal);	30	0	0	0	0	0	0	1	1.000 (0.19, 0.19, 0.19)
	6c	(((Aoe, Dor), ((((Bes, Num), Mel), Bur), (Era, Sar))), Tal);	48	0	0	0	0	1	1.000 (0.19, 0.19, 0.19)	0	0
	6d	((Aoe, ((((Bes, (Mel, Num)), Bur), Dor), (Era, Sar))), Tal);	6	0	0	0	0	0	0	1	1.000 (0.09, 0.09, 0.09)
	6d	((Aoe, (((((Bes, Mel), Num), Bur), Dor), (Era, Sar))), Tal);	34	1	1.000 (0.11, 0.11, 0.11)	0	0	0	0	0	0
	6d	((Aoe, (((((Bes, Mel), Num), Dor), (Era, Sar)), Bur)), Tal);	49	0	0	1	1.000 (0.08, 0.08, 0.08)	0	0	0	0
	6d	((Aoe, (((((Bes, Num), Mel), (Era, Sar)), Bur), Dor)), Tal);	50	0	0	0	0	1	1.000 (0.07, 0.07, 0.07)	0	0
	7	(((Aoe, (((Bes, (Mel, Num)), Bur), Dor)), (Era, Sar)), Tal);	1	2	0.333 (0.47, 0.50, 0.54)	0	0	4	0.444 (0.40, 0.70, 0.96)	4	0.667 (0.45, 0.59, 0.68)
	7	(((Aoe, ((((Bes, Num), Mel), Bur), Dor)), (Era, Sar)), Tal);	2	1	0.167 (0.95, 0.95, 0.95)	1	0.250 (0.25, 0.25, 0.25)	2	0.222 (0.59, 0.62, 0.64)	0	0
	7	(((Aoe, (((Bes, (Mel, Num)), Dor), Bur)), (Era, Sar)), Tal);	5	1	0.167 (0.44, 0.44, 0.44)	1	0.250 (0.55, 0.55, 0.55)	0	0	0	0
	7	((Aoe, ((((Bes, (Mel, Num)), Bur), Dor), (Era, Sar))), Tal);	6	2	0.333 (0.47, 0.54, 0.62)	1	0.250 (0.30, 0.30, 0.30)	0	0	0	0
	7	(((((Aoe, (Bes, (Mel, Num))), Dor), Bur), (Era, Sar)), Tal);	15	0	0	0	0	2	0.222 (0.35, 0.45, 0.55)	0	0
	7	(((((Aoe, (Bes, (Mel, Num))), Bur), Dor), (Era, Sar)), Tal);	16	0	0	0	0	0	0	1	0.167 (0.30, 0.30, 0.30)
	7	(((Aoe, (Era, Sar)), (((Bes, (Mel, Num)), Bur), Dor)), Tal);	21	0	0	1	0.250 (0.47, 0.47, 0.47)	0	0	0	0
	7	((((Aoe, ((Bes, (Mel, Num)), Bur)), (Era, Sar)), Dor), Tal);	28	0	0	0	0	0	0	1	0.167 (0.23, 0.23, 0.23)
	7	(((Aoe, (((Bes, (Mel, Num)), Bur), (Era, Sar))), Dor), Tal);	32	0	0	0	0	1	0.111 (0.30, 0.30, 0.30)	0	0
	8	(((Aoe, (((Bes, (Mel, Num)), Bur), Dor)), (Era, Sar)), Tal);	1	3	0.750 (0.45, 0.63, 0.89)	1	0.500 (0.67, 0.67, 0.67)	2	0.400 (0.66, 0.79, 0.93)	1	0.250 (0.51, 0.51, 0.51)
	8	(((Aoe, ((((Bes, Num), Mel), Bur), Dor)), (Era, Sar)), Tal);	2	1	0.250 (0.50, 0.50, 0.50)	1	0.500 (0.75, 0.75, 0.75)	1	0.200 (0.61, 0.61, 0.61)	0	0
	8	(((Aoe, ((((Bes, Num), Mel), Dor), Bur)), (Era, Sar)), Tal);	3	0	0	0	0	1	0.200 (0.43, 0.43, 0.43)	1	0.250 (0.43, 0.43, 0.43)
	8	((((Aoe, ((Bes, (Mel, Num)), Bur)), Dor), (Era, Sar)), Tal);	11	0	0	0	0	1	0.200 (0.36, 0.36, 0.36)	1	0.250 (0.10, 0.10, 0.10)
	8	((((Aoe, ((Bes, (Mel, Num)), Dor)), Bur), (Era, Sar)), Tal);	14	0	0	0	0	0	0	1	0.250 (0.35, 0.35, 0.35)
	9	(((Aoe, (((Bes, (Mel, Num)), Bur), Dor)), (Era, Sar)), Tal);	1	1	0.333 (0.58, 0.58, 0.58)	2	1.000 (0.34, 0.41, 0.47)	4	0.800 (0.46, 0.64, 0.91)	2	0.667 (0.60, 0.66, 0.73)
	9	(((Aoe, (((Bes, (Mel, Num)), Dor), Bur)), (Era, Sar)), Tal);	5	0	0	0	0	1	0.200 (0.39, 0.39, 0.39)	0	0
	9	(((Aoe, ((((Bes, Mel), Num), Bur), Dor)), (Era, Sar)), Tal);	9	1	0.333 (0.76, 0.76, 0.76)	0	0	0	0	0	0
	9	((((Aoe, ((Bes, (Mel, Num)), Bur)), Dor), (Era, Sar)), Tal);	11	1	0.333 (0.22, 0.22, 0.22)	0	0	0	0	1	0.333 (0.51, 0.51, 0.51)
	10	(((Aoe, (((Bes, (Mel, Num)), Bur), Dor)), (Era, Sar)), Tal);	1	2	0.250 (0.21, 0.48, 0.75)	0	0	7	0.583 (0.31, 0.48, 0.94)	4	0.500 (0.33, 0.61, 0.83)
	10	(((Aoe, ((((Bes, Num), Mel), Bur), Dor)), (Era, Sar)), Tal);	2	0	0	0	0	1	0.083 (0.39, 0.39, 0.39)	1	0.125 (0.51, 0.51, 0.51)
	10	(((Aoe, ((((Bes, Num), Mel), Dor), Bur)), (Era, Sar)), Tal);	3	0	0	0	0	1	0.083 (0.58, 0.58, 0.58)	0	0
	10	((Aoe, (((((Bes, Num), Mel), Bur), Dor), (Era, Sar))), Tal);	4	1	0.125 (0.56, 0.56, 0.56)	0	0	1	0.083 (0.30, 0.30, 0.30)	0	0
	10	(((Aoe, (((Bes, (Mel, Num)), Dor), Bur)), (Era, Sar)), Tal);	5	0	0	0	0	1	0.083 (0.48, 0.48, 0.48)	0	0
	10	((Aoe, ((((Bes, (Mel, Num)), Bur), Dor), (Era, Sar))), Tal);	6	2	0.250 (0.44, 0.49, 0.54)	3	0.750 (0.36, 0.79, 0.92)	1	0.083 (0.21, 0.21, 0.21)	1	0.125 (0.42, 0.42, 0.42)
	10	((Aoe, ((((Bes, (Mel, Num)), Dor), Bur), (Era, Sar))), Tal);	12	1	0.125 (0.34, 0.34, 0.34)	0	0	0	0	0	0
	10	((Aoe, (((((Bes, Num), Mel), Bur), (Era, Sar)), Dor)), Tal);	13	0	0	0	0	0	0	1	0.125 (0.09, 0.09, 0.09)
	10	(((((Aoe, (Bes, (Mel, Num))), Bur), Dor), (Era, Sar)), Tal);	16	0	0	0	0	0	0	1	0.125 (0.18, 0.18, 0.18)
	10	(((Aoe, (Era, Sar)), (((Bes, (Mel, Num)), Bur), Dor)), Tal);	21	1	0.125 (0.38, 0.38, 0.38)	1	0.250 (0.66, 0.66, 0.66)	0	0	0	0
	10	((Aoe, (((((Bes, Num), Mel), Dor), (Era, Sar)), Bur)), Tal);	52	1	0.125 (0.14, 0.14, 0.14)	0	0	0	0	0	0
	11	(((Aoe, (((Bes, (Mel, Num)), Bur), Dor)), (Era, Sar)), Tal);	1	1	0.250 (0.54, 0.54, 0.54)	0	0	3	0.500 (0.47, 0.48, 0.55)	2	0.500 (0.54, 0.58, 0.62)
	11	(((Aoe, ((((Bes, Num), Mel), Bur), Dor)), (Era, Sar)), Tal);	2	1	0.250 (0.59, 0.59, 0.59)	1	0.500 (0.47, 0.47, 0.47)	2	0.333 (0.32, 0.64, 0.97)	2	0.500 (0.34, 0.57, 0.80)
	11	(((Aoe, (((Bes, (Mel, Num)), Dor), Bur)), (Era, Sar)), Tal);	5	2	0.500 (0.60, 0.66, 0.72)	1	0.500 (0.73, 0.73, 0.73)	1	0.167 (0.73, 0.73, 0.73)	0	0
	12	(((Aoe, (((Bes, (Mel, Num)), Bur), Dor)), (Era, Sar)), Tal);	1	3	0.500 (0.64, 0.82, 0.97)	1	0.333 (0.88, 0.88, 0.88)	6	0.667 (0.51, 0.66, 0.97)	4	0.667 (0.31, 0.54, 0.64)
	12	(((Aoe, ((((Bes, Num), Mel), Bur), Dor)), (Era, Sar)), Tal);	2	0	0	1	0.333 (0.95, 0.95, 0.95)	2	0.222 (0.82, 0.88, 0.95)	0	0
	12	((Aoe, (((((Bes, Num), Mel), Bur), Dor), (Era, Sar))), Tal);	4	2	0.333 (0.55, 0.75, 0.94)	0	0	0	0	0	0
	12	((Aoe, ((((Bes, (Mel, Num)), Bur), Dor), (Era, Sar))), Tal);	6	1	0.167 (0.72, 0.72, 0.72)	0	0	0	0	0	0
	12	((Aoe, (((((Bes, Num), Mel), Bur), (Era, Sar)), Dor)), Tal);	13	0	0	0	0	0	0	1	0.167 (0.45, 0.45, 0.45)
	12	(((((Aoe, (Bes, (Mel, Num))), Dor), Bur), (Era, Sar)), Tal);	15	0	0	0	0	0	0	1	0.167 (0.23, 0.23, 0.23)
	12	(((Aoe, (Era, Sar)), (((Bes, (Mel, Num)), Bur), Dor)), Tal);	21	0	0	1	0.333 (0.28, 0.28, 0.28)	0	0	0	0
	12	(((Aoe, ((((Bes, Num), Mel), Bur), (Era, Sar))), Dor), Tal);	31	0	0	0	0	1	0.111 (0.38, 0.38, 0.38)	0	0
	13a	(((Aoe, (((Bes, (Mel, Num)), Bur), Dor)), (Era, Sar)), Tal);	1	2	0.250 (0.67, 0.71, 0.74)	1	0.200 (0.31, 0.31, 0.31)	7	0.583 (0.60, 0.82, 0.98)	6	0.750 (0.38, 0.56, 0.90)
	13a	(((Aoe, ((((Bes, Num), Mel), Bur), Dor)), (Era, Sar)), Tal);	2	3	0.375 (0.55, 0.64, 0.93)	2	0.400 (0.60, 0.63, 0.66)	2	0.167 (0.30, 0.50, 0.70)	2	0.250 (0.59, 0.70, 0.82)
	13a	((Aoe, (((((Bes, Num), Mel), Bur), Dor), (Era, Sar))), Tal);	4	0	0	0	0	1	0.083 (0.42, 0.42, 0.42)	0	0
	13a	((Aoe, ((((Bes, (Mel, Num)), Bur), Dor), (Era, Sar))), Tal);	6	2	0.250 (0.42, 0.50, 0.58)	1	0.200 (0.51, 0.51, 0.51)	2	0.167 (0.43, 0.52, 0.61)	0	0
	13a	((Aoe, ((((Bes, (Mel, Num)), Dor), Bur), (Era, Sar))), Tal);	12	1	0.125 (0.37, 0.37, 0.37)	0	0	0	0	0	0
	13a	(((Aoe, (Era, Sar)), ((((Bes, Num), Mel), Bur), Dor)), Tal);	18	0	0	1	0.200 (0.32, 0.32, 0.32)	0	0	0	0
	13b	(((Aoe, ((Bes, Num), Mel)), ((Bur, Dor), (Era, Sar))), Tal);	22	0	0	0	0	1	1.000 (0.84, 0.84, 0.84)	1	1.000 (0.74, 0.74, 0.74)
	13b	(((Aoe, ((Bes, Num), Mel)), ((Bur, (Era, Sar)), Dor)), Tal);	44	1	1.000 (0.25, 0.25, 0.25)	0	0	0	0	0	0
	13b	(((Aoe, (Bes, (Mel, Num))), ((Bur, (Era, Sar)), Dor)), Tal);	45	0	0	1	1.000 (0.05, 0.05, 0.05)	0	0	0	0
	13c	(((((Aoe, (Bes, (Mel, Num))), Dor), Bur), (Era, Sar)), Tal);	15	0	0	0	0	0	0	1	1.000 (0.05, 0.05, 0.05)
	13c	(((((Aoe, Dor), ((Bes, Mel), Num)), Bur), (Era, Sar)), Tal);	37	1	1.000 (0.04, 0.04, 0.04)	0	0	0	0	0	0
	13c	(((Aoe, Dor), ((((Bes, Mel), Num), (Era, Sar)), Bur)), Tal);	47	0	0	1	1.000 (0.03, 0.03, 0.03)	0	0	0	0
	13c	((Aoe, (((((Bes, Num), Mel), (Era, Sar)), Dor), Bur)), Tal);	51	0	0	0	0	1	1.000 (0.09, 0.09, 0.09)	0	0
	14	(((Aoe, (((Bes, (Mel, Num)), Bur), Dor)), (Era, Sar)), Tal);	1	1	0.333 (0.80, 0.80, 0.80)	1	0.500 (0.54, 0.54, 0.54)	2	0.400 (0.84, 0.90, 0.96)	2	0.667 (0.54, 0.69, 0.83)
	14	(((Aoe, ((((Bes, Num), Mel), Dor), Bur)), (Era, Sar)), Tal);	3	1	0.333 (0.25, 0.25, 0.25)	0	0	1	0.200 (0.62, 0.62, 0.62)	0	0
	14	(((Aoe, (((Bes, (Mel, Num)), Dor), Bur)), (Era, Sar)), Tal);	5	1	0.333 (0.57, 0.57, 0.57)	0	0	1	0.200 (0.45, 0.45, 0.45)	0	0
	14	((((Aoe, ((Bes, (Mel, Num)), Dor)), Bur), (Era, Sar)), Tal);	14	0	0	0	0	0	0	1	0.333 (0.62, 0.62, 0.62)
	14	(((((Aoe, ((Bes, Num), Mel)), Bur), Dor), (Era, Sar)), Tal);	27	0	0	0	0	1	0.200 (0.23, 0.23, 0.23)	0	0
	14	(((Aoe, (Era, Sar)), ((((Bes, Num), Mel), Dor), Bur)), Tal);	46	0	0	1	0.500 (0.30, 0.30, 0.30)	0	0	0	0
	15	(((Aoe, (((Bes, (Mel, Num)), Bur), Dor)), (Era, Sar)), Tal);	1	0	0	1	0.500 (0.11, 0.11, 0.11)	1	0.200 (0.88, 0.88, 0.88)	0	0
	15	(((Aoe, ((((Bes, Num), Mel), Bur), Dor)), (Era, Sar)), Tal);	2	1	0.333 (0.24, 0.24, 0.24)	1	0.500 (0.37, 0.37, 0.37)	2	0.400 (0.46, 0.49, 0.52)	0	0
	15	(((Aoe, (((Bes, (Mel, Num)), Dor), Bur)), (Era, Sar)), Tal);	5	2	0.667 (0.39, 0.47, 0.55)	0	0	1	0.200 (0.40, 0.40, 0.40)	1	0.333 (0.39, 0.39, 0.39)
	15	((((Aoe, ((Bes, (Mel, Num)), Dor)), Bur), (Era, Sar)), Tal);	14	0	0	0	0	1	0.200 (0.72, 0.72, 0.72)	0	0
	15	(((((Aoe, (Bes, (Mel, Num))), Bur), Dor), (Era, Sar)), Tal);	16	0	0	0	0	0	0	1	0.333 (0.46, 0.46, 0.46)
	15	((((Aoe, (((Bes, Num), Mel), Dor)), Bur), (Era, Sar)), Tal);	25	0	0	0	0	0	0	1	0.333 (0.37, 0.37, 0.37)
	16	(((Aoe, (((Bes, (Mel, Num)), Bur), Dor)), (Era, Sar)), Tal);	1	2	0.500 (0.73, 0.84, 0.94)	2	1.000 (0.58, 0.70, 0.82)	5	0.833 (0.59, 0.81, 0.98)	3	0.750 (0.32, 0.80, 0.93)
	16	(((Aoe, (((Bes, (Mel, Num)), Dor), Bur)), (Era, Sar)), Tal);	5	1	0.250 (0.43, 0.43, 0.43)	0	0	0	0	1	0.250 (0.40, 0.40, 0.40)
	16	((Aoe, ((((Bes, (Mel, Num)), Bur), Dor), (Era, Sar))), Tal);	6	1	0.250 (0.33, 0.33, 0.33)	0	0	0	0	0	0
	16	(((Aoe, ((Bes, (Mel, Num)), (Bur, Dor))), (Era, Sar)), Tal);	7	0	0	0	0	1	0.167 (0.54, 0.54, 0.54)	0	0
	17	(((Aoe, (((Bes, (Mel, Num)), Bur), Dor)), (Era, Sar)), Tal);	1	3	0.429 (0.46, 0.71, 0.78)	1	0.250 (0.94, 0.94, 0.94)	7	0.700 (0.48, 0.63, 0.89)	3	0.429 (0.31, 0.79, 0.81)
	17	(((Aoe, ((((Bes, Num), Mel), Bur), Dor)), (Era, Sar)), Tal);	2	1	0.143 (0.49, 0.49, 0.49)	2	0.500 (0.38, 0.46, 0.55)	0	0	1	0.143 (0.48, 0.48, 0.48)
	17	(((Aoe, ((((Bes, Num), Mel), Dor), Bur)), (Era, Sar)), Tal);	3	0	0	0	0	0	0	1	0.143 (0.57, 0.57, 0.57)
	17	(((Aoe, (((Bes, (Mel, Num)), Dor), Bur)), (Era, Sar)), Tal);	5	1	0.143 (0.57, 0.57, 0.57)	1	0.250 (0.75, 0.75, 0.75)	1	0.100 (0.36, 0.36, 0.36)	0	0
	17	((((Aoe, ((Bes, (Mel, Num)), Bur)), Dor), (Era, Sar)), Tal);	11	1	0.143 (0.25, 0.25, 0.25)	0	0	0	0	1	0.143 (0.51, 0.51, 0.51)
	17	((((Aoe, (((Bes, Num), Mel), Bur)), Dor), (Era, Sar)), Tal);	17	0	0	0	0	1	0.100 (0.37, 0.37, 0.37)	0	0
	17	((((Aoe, ((Bes, Num), Mel)), (Bur, Dor)), (Era, Sar)), Tal);	20	0	0	0	0	1	0.100 (0.10, 0.10, 0.10)	1	0.143 (0.23, 0.23, 0.23)
	17	(((Aoe, ((((Bes, Num), Mel), Bur), (Era, Sar))), Dor), Tal);	31	1	0.143 (0.55, 0.55, 0.55)	0	0	0	0	0	0
	18	(((Aoe, (((Bes, (Mel, Num)), Bur), Dor)), (Era, Sar)), Tal);	1	6	0.667 (0.42, 0.63, 0.87)	3	0.500 (0.46, 0.73, 0.94)	7	0.583 (0.52, 0.81, 0.89)	5	0.556 (0.47, 0.80, 0.87)
	18	(((Aoe, ((((Bes, Num), Mel), Bur), Dor)), (Era, Sar)), Tal);	2	0	0	1	0.167 (0.43, 0.43, 0.43)	1	0.083 (0.48, 0.48, 0.48)	2	0.222 (0.30, 0.41, 0.52)
	18	((Aoe, (((((Bes, Num), Mel), Bur), Dor), (Era, Sar))), Tal);	4	1	0.111 (0.42, 0.42, 0.42)	0	0	2	0.167 (0.37, 0.49, 0.61)	0	0
	18	(((Aoe, (((Bes, (Mel, Num)), Dor), Bur)), (Era, Sar)), Tal);	5	1	0.111 (0.40, 0.40, 0.40)	0	0	0	0	0	0
	18	((Aoe, ((((Bes, (Mel, Num)), Bur), Dor), (Era, Sar))), Tal);	6	1	0.111 (0.54, 0.54, 0.54)	1	0.167 (0.67, 0.67, 0.67)	1	0.083 (0.53, 0.53, 0.53)	0	0
	18	(((Aoe, ((Bes, (Mel, Num)), (Bur, Dor))), (Era, Sar)), Tal);	7	0	0	0	0	1	0.083 (0.44, 0.44, 0.44)	0	0
	18	((((Aoe, ((Bes, (Mel, Num)), Bur)), Dor), (Era, Sar)), Tal);	11	0	0	0	0	0	0	1	0.111 (0.50, 0.50, 0.50)
	18	((Aoe, ((((Bes, Num), Mel), (Bur, Dor)), (Era, Sar))), Tal);	23	0	0	1	0.167 (0.35, 0.35, 0.35)	0	0	0	0
	18	((Aoe, (((Bes, (Mel, Num)), (Bur, Dor)), (Era, Sar))), Tal);	24	0	0	0	0	0	0	1	0.111 (0.43, 0.43, 0.43)
	19	(((Aoe, (((Bes, (Mel, Num)), Bur), Dor)), (Era, Sar)), Tal);	1	3	0.429 (0.40, 0.75, 0.76)	0	0	5	0.500 (0.57, 0.70, 0.94)	3	0.429 (0.45, 0.57, 0.75)
	19	(((Aoe, ((((Bes, Num), Mel), Bur), Dor)), (Era, Sar)), Tal);	2	1	0.143 (0.30, 0.30, 0.30)	0	0	1	0.100 (0.41, 0.41, 0.41)	1	0.143 (0.53, 0.53, 0.53)
	19	((Aoe, (((((Bes, Num), Mel), Bur), Dor), (Era, Sar))), Tal);	4	0	0	1	0.250 (0.41, 0.41, 0.41)	1	0.100 (0.58, 0.58, 0.58)	0	0
	19	(((Aoe, (((Bes, (Mel, Num)), Dor), Bur)), (Era, Sar)), Tal);	5	0	0	0	0	0	0	2	0.286 (0.07, 0.19, 0.30)
	19	((Aoe, ((((Bes, (Mel, Num)), Bur), Dor), (Era, Sar))), Tal);	6	1	0.143 (0.28, 0.28, 0.28)	2	0.500 (0.28, 0.37, 0.46)	1	0.100 (0.41, 0.41, 0.41)	0	0
	19	((Aoe, (((((Bes, Num), Mel), Dor), Bur), (Era, Sar))), Tal);	8	1	0.143 (0.20, 0.20, 0.20)	0	0	0	0	0	0
	19	((((Aoe, ((Bes, (Mel, Num)), Bur)), Dor), (Era, Sar)), Tal);	11	0	0	0	0	0	0	1	0.143 (0.38, 0.38, 0.38)
	19	((((Aoe, ((Bes, Num), Mel)), (Bur, Dor)), (Era, Sar)), Tal);	20	0	0	0	0	1	0.100 (0.20, 0.20, 0.20)	0	0
	19	(((Aoe, ((((Bes, Num), Mel), (Era, Sar)), Bur)), Dor), Tal);	30	1	0.143 (0.02, 0.02, 0.02)	0	0	0	0	0	0
	19	(((Aoe, (((Bes, (Mel, Num)), Bur), (Era, Sar))), Dor), Tal);	32	0	0	1	0.250 (0.14, 0.14, 0.14)	0	0	0	0
	19	((Aoe, ((((Bes, (Mel, Num)), Bur), (Era, Sar)), Dor)), Tal);	36	0	0	0	0	1	0.100 (0.31, 0.31, 0.31)	0	0
	20	(((Aoe, (((Bes, (Mel, Num)), Bur), Dor)), (Era, Sar)), Tal);	1	4	0.667 (0.27, 0.72, 0.94)	1	0.250 (0.76, 0.76, 0.76)	5	0.556 (0.42, 0.85, 0.95)	4	0.571 (0.73, 0.81, 0.90)
	20	(((Aoe, ((((Bes, Num), Mel), Bur), Dor)), (Era, Sar)), Tal);	2	1	0.167 (0.75, 0.75, 0.75)	1	0.250 (0.37, 0.37, 0.37)	3	0.333 (0.44, 0.54, 0.98)	2	0.286 (0.28, 0.42, 0.56)
	20	((Aoe, (((((Bes, Num), Mel), Bur), Dor), (Era, Sar))), Tal);	4	0	0	2	0.500 (0.32, 0.34, 0.36)	0	0	0	0
	20	((Aoe, (((((Bes, Num), Mel), Bur), (Era, Sar)), Dor)), Tal);	13	1	0.167 (0.21, 0.21, 0.21)	0	0	1	0.111 (0.27, 0.27, 0.27)	0	0
	20	((Aoe, ((((Bes, (Mel, Num)), Bur), (Era, Sar)), Dor)), Tal);	36	0	0	0	0	0	0	1	0.143 (0.28, 0.28, 0.28)
	21a	(((Aoe, ((((Bes, Num), Mel), Bur), Dor)), (Era, Sar)), Tal);	2	1	0.500 (0.50, 0.50, 0.50)	0	0	2	0.667 (0.41, 0.61, 0.82)	2	1.000 (0.67, 0.78, 0.88)
	21a	((Aoe, (((((Bes, Num), Mel), Bur), Dor), (Era, Sar))), Tal);	4	1	0.500 (1.00, 1.00, 1.00)	0	0	0	0	0	0
	21a	((Aoe, (((((Bes, Num), Mel), Bur), (Era, Sar)), Dor)), Tal);	13	0	0	0	0	1	0.333 (0.79, 0.79, 0.79)	0	0
	21a	(((Aoe, (Era, Sar)), ((((Bes, Num), Mel), Bur), Dor)), Tal);	18	0	0	1	1.000 (0.76, 0.76, 0.76)	0	0	0	0
	21b	((Aoe, (((((Bes, Num), Mel), Bur), (Era, Sar)), Dor)), Tal);	13	1	1.000 (0.58, 0.58, 0.58)	1	1.000 (0.41, 0.41, 0.41)	1	1.000 (0.70, 0.70, 0.70)	1	1.000 (0.23, 0.23, 0.23)
	21c	(((Aoe, ((((Bes, Num), Mel), Bur), Dor)), (Era, Sar)), Tal);	2	0	0	0	0	1	0.500 (0.98, 0.98, 0.98)	0	0
	21c	((((Aoe, (((Bes, Num), Mel), Bur)), Dor), (Era, Sar)), Tal);	17	0	0	0	0	1	0.500 (0.13, 0.13, 0.13)	1	1.000 (0.68, 0.68, 0.68)
	21c	(((Aoe, (Era, Sar)), ((((Bes, Num), Mel), Bur), Dor)), Tal);	18	1	1.000 (0.38, 0.38, 0.38)	1	1.000 (0.56, 0.56, 0.56)	0	0	0	0

## Sheet: 8-h-msci-8spp-bf
Table 8. Bayes factor B = M_1E/M_1D for comparing the two MSC-I models in Figure 1D (M_1E; scenario 1) and Figure 1E (M_1D; scenario 2), calculated for coding and noncoding loci for each chromosomal region using thermodynamic integration with 32 Gaussian quadrature points. M_1E (scenario 2) is preferred if B > 100, M_1D (scenario 1) is preferred if B < 0.01, and the test is not significant (n.s.)…
region	chr	logZ(scenario1)	logZ(scenario2)	log_bf	bf	prefer	log_bf_adj	bf_adj	prefer_adj
Coding	1	-1.18559e+06	-1.18549e+06	99.3046	exp(99.3)	scenario2	68.3949	exp(68.39)	scenario2
	2a	-53432	-53431.9	0.0823206	1.0858	n.s.	0.1213	1.12896	n.s.
	2b	-5519.7	-5518.81	0.892624	2.44153	n.s.	0.8734	2.39504	n.s.
	2c	-369281	-369265	16.3364	exp(16.34)	scenario2	19.567	exp(19.57)	scenario2
	3	-402229	-402240	-11.4134	1.10467e-05	scenario1	-2.1485	0.116659	n.s.
	4	-415171	-415152	19.6303	exp(19.63)	scenario2	20.8323	exp(20.83)	scenario2
	5	-532211	-532212	-1.09846	0.333383	n.s.	-0.4921	0.611341	n.s.
	6a	-597158	-597162	-3.26428	0.0382245	n.s.	-1.3935	0.248205	n.s.
	6b	-7674.4	-7674.1	0.304149	1.35547	n.s.	0.2916	1.33857	n.s.
	6c	-19128.9	-19128.4	0.46424	1.5908	n.s.	0.4886	1.63003	n.s.
	6d	-59136.7	-59138.2	-1.45845	0.232598	n.s.	-1.1943	0.302916	n.s.
	7	-900397	-900363	34.2106	exp(34.21)	scenario2	34.4889	exp(34.49)	scenario2
	8	-496658	-496675	-17.5228	2.4545e-08	scenario1	-5.4787	0.00417475	scenario1
	9	-402652	-402663	-10.9438	1.76665e-05	scenario1	-8.8438	0.000144273	scenario1
	10	-1.07995e+06	-1.07998e+06	-32.7461	6.00577e-15	scenario1	-37.8972	3.47901e-17	scenario1
	11	-823533	-823561	-28.7623	3.2261e-13	scenario1	-24.7763	1.73696e-11	scenario1
	12	-916774	-916847	-72.6296	2.86666e-32	scenario1	-52.5791	1.46281e-23	scenario1
	13a	-837569	-837543	25.1647	exp(25.16)	scenario2	13.8462	exp(13.85)	scenario2
	13b	-2385.03	-2385.2	-0.166463	0.846654	n.s.	-0.106	0.899425	n.s.
	13c	-37218.3	-37216.4	1.92876	6.88095	n.s.	2.5507	12.8161	n.s.
	14	-494528	-494544	-16.4075	7.48731e-08	scenario1	-11.712	8.19489e-06	scenario1
	15	-543478	-543504	-25.9816	5.20385e-12	scenario1	-12.0578	5.79915e-06	scenario1
	16	-459864	-459875	-10.2	3.71689e-05	scenario1	-5.4017	0.00450891	scenario1
	17	-822761	-822812	-51.1562	6.06966e-23	scenario1	-54.1652	2.99469e-24	scenario1
	18	-814271	-814284	-12.6716	3.13887e-06	scenario1	-20.8474	8.83261e-10	scenario1
	19	-927613	-927629	-16.472	7.01927e-08	scenario1	-4.1593	0.0156185	n.s.
	20	-1.02328e+06	-1.0232e+06	87.3524	exp(87.35)	scenario2	45.2571	exp(45.26)	scenario2
	21a	-433467	-433414	53.1245	exp(53.12)	scenario2	37.8014	exp(37.80)	scenario2
	21b	-25753.5	-25749.5	3.99904	54.5458	n.s.	4.2023	66.8399	n.s.
	21c	-167206	-167182	23.7805	exp(23.78)	scenario2	21.1409	exp(21.14)	scenario2
Noncoding	1	-341705	-341708	-2.96279	0.0516743	n.s.	-4.821	0.00805872	scenario1
	2a	-12975.9	-12977.2	-1.38488	0.250354	n.s.	-1.2909	0.275023	n.s.
	2b	-137.663	-137.802	-0.138789	0.870412	n.s.	-0.1391	0.870141	n.s.
	2c	-41006.2	-41005.6	0.555617	1.74302	n.s.	0.5953	1.81357	n.s.
	3	-81790.1	-81790.9	-0.836395	0.43327	n.s.	-0.9346	0.392743	n.s.
	4	-75708.7	-75711	-2.27451	0.102847	n.s.	-2.5335	0.0793807	n.s.
	5	-122102	-122104	-2.59326	0.0747758	n.s.	-2.3423	0.0961063	n.s.
	6a	-163362	-163363	-1.18305	0.306344	n.s.	-2.8525	0.0576999	n.s.
	6b	-576.418	-576.374	0.0441676	1.04516	n.s.	0.0409	1.04175	n.s.
	6c	-1380.26	-1380.32	-0.0525611	0.948796	n.s.	-0.0437	0.957241	n.s.
	6d	-8465.52	-8465.91	-0.389566	0.677351	n.s.	-0.3985	0.671326	n.s.
	7	-216010	-216000	10.1995	exp(10.2)	scenario2	9.5005	exp(9.50)	scenario2
	8	-113995	-113983	11.7594	exp(11.76)	scenario2	11.5225	exp(11.52)	scenario2
	9	-77966.7	-77973	-6.30339	0.00183008	scenario1	-6.4658	0.00155575	scenario1
	10	-258343	-258343	0.00715243	1.00718	n.s.	0.7568	2.13144	n.s.
	11	-130370	-130372	-1.90502	0.14882	n.s.	-3.1944	0.0409911	n.s.
	12	-210292	-210294	-2.46022	0.0854161	n.s.	-3.5337	0.0291967	n.s.
	13a	-295047	-295051	-4.16031	0.0156027	n.s.	-4.4071	0.0121905	n.s.
	13b	-263.1	-262.813	0.286939	1.33234	n.s.	0.2862	1.33136	n.s.
	13c	-4921.3	-4921.5	-0.195784	0.82219	n.s.	-0.1526	0.858473	n.s.
	14	-87046.5	-87052.2	-5.6412	0.00354862	scenario1	-6.7449	0.00117687	scenario1
	15	-102570	-102569	0.0693358	1.0718	n.s.	-1.516	0.219588	n.s.
	16	-124952	-124950	2.29334	9.90802	n.s.	2.7683	15.9315	n.s.
	17	-269735	-269721	13.4199	exp(13.42)	scenario2	11.2145	exp(11.21)	scenario2
	18	-378129	-378133	-4.13446	0.0160113	n.s.	-0.3718	0.689492	n.s.
	19	-236109	-236116	-7.19092	0.000753392	scenario1	-6.4831	0.00152906	scenario1
	20	-217858	-217868	-10.2928	3.38749e-05	scenario1	-13.2142	1.82451e-06	scenario1
	21a	-61175.4	-61170.7	4.76234	117.02	scenario2	4.6804	107.813	scenario2
	21b	-1355.37	-1355.43	-0.0554279	0.94608	n.s.	-0.0679	0.934354	n.s.
	21c	-28122	-28118.1	3.97855	53.4396	n.s.	3.8709	47.9856	n.s.

## Sheet: 9-i-etales-8spp-scenario1
Table 9. Posterior means and 95% HPD intervals (in parentheses) of parameters from the BPP MSC-I model in Figure 1D (scenario 1) using noncoding and coding loci for each chromosomal region of 'etales-8spp' dataset (see Supplementary File 1—table 1). Multiple posterior peaks, if present, are reported, e.g. there are two peaks, denoted chr1 and chr1-alt, from the coding loci in chromosome 1. Plots …
region	variable	chr1	chr1-alt	chr2c	chr3	chr4	chr5	chr6a	chr7	chr7-alt	chr8	chr9	chr10	chr11	chr12	chr13a	chr14	chr15	chr16	chr17	chr18	chr19	chr20	chr20-alt	chr21a	chr21a-alt	chr21b	chr21c
Coding	phi_es2<-nmbd2	0.7417 (0.6945, 0.7879)	0.2651 (0.2256, 0.3046)	0.6434 (0.5619, 0.7212)	0.6958 (0.6206, 0.7688)	0.5792 (0.4840, 0.6714)	0.5733 (0.5009, 0.6431)	0.6713 (0.6118, 0.7292)	0.7336 (0.6818, 0.7830)	0.7508 (0.7000, 0.7981)	0.6626 (0.5962, 0.7263)	0.6113 (0.5253, 0.6965)	0.7312 (0.6867, 0.7755)	0.7198 (0.6716, 0.7667)	0.6679 (0.6197, 0.7140)	0.7556 (0.7112, 0.8000)	0.5765 (0.4975, 0.6513)	0.6136 (0.5591, 0.6663)	0.6139 (0.5423, 0.6829)	0.7109 (0.6611, 0.7628)	0.7500 (0.6784, 0.8198)	0.6402 (0.5861, 0.6949)	0.8078 (0.7620, 0.8527)	0.2839 (0.2450, 0.3249)	0.8519 (0.7916, 0.9101)	0.2971 (0.2379, 0.3563)	0.6077 (0.2150, 1.0000)	0.8490 (0.7290, 0.9541)
Coding	phi_nmbd2<-es2	0.0019 (0.0000, 0.0055)	0.4981 (0.4514, 0.5408)	0.0085 (0.0000, 0.0241)	0.0090 (0.0000, 0.0228)	0.0118 (0.0000, 0.0318)	0.0063 (0.0000, 0.0176)	0.0044 (0.0000, 0.0128)	0.0081 (0.0010, 0.0164)	0.0030 (0.0000, 0.0086)	0.0108 (0.0000, 0.0276)	0.0095 (0.0000, 0.0257)	0.0039 (0.0000, 0.0107)	0.0053 (0.0000, 0.0147)	0.0041 (0.0000, 0.0115)	0.0035 (0.0000, 0.0100)	0.0057 (0.0000, 0.0163)	0.0115 (0.0000, 0.0268)	0.0056 (0.0000, 0.0159)	0.0056 (0.0000, 0.0152)	0.0027 (0.0000, 0.0080)	0.0046 (0.0000, 0.0127)	0.0027 (0.0000, 0.0079)	0.5556 (0.5122, 0.5942)	0.0082 (0.0000, 0.0216)	0.6464 (0.5921, 0.7028)	0.4747 (0.0403, 0.8697)	0.0142 (0.0000, 0.0387)
Coding	tau_nmbdaes	0.0251 (0.0243, 0.0258)	0.0229 (0.0223, 0.0235)	0.0275 (0.0263, 0.0287)	0.0269 (0.0253, 0.0285)	0.0255 (0.0244, 0.0266)	0.0263 (0.0255, 0.0272)	0.0262 (0.0253, 0.0270)	0.0259 (0.0251, 0.0266)	0.0263 (0.0255, 0.0271)	0.0267 (0.0257, 0.0276)	0.0263 (0.0253, 0.0274)	0.0254 (0.0247, 0.0262)	0.0264 (0.0256, 0.0271)	0.0255 (0.0248, 0.0262)	0.0256 (0.0247, 0.0264)	0.0272 (0.0262, 0.0281)	0.0280 (0.0271, 0.0289)	0.0276 (0.0266, 0.0287)	0.0255 (0.0246, 0.0264)	0.0252 (0.0238, 0.0266)	0.0238 (0.0231, 0.0245)	0.0260 (0.0251, 0.0270)	0.0233 (0.0228, 0.0238)	0.0281 (0.0266, 0.0295)	0.0243 (0.0235, 0.0252)	0.0246 (0.0214, 0.0292)	0.0278 (0.0249, 0.0301)
Coding	tau_nmbda	0.0179 (0.0176, 0.0181)	0.0178 (0.0176, 0.0180)	0.0192 (0.0187, 0.0197)	0.0181 (0.0176, 0.0185)	0.0181 (0.0176, 0.0186)	0.0189 (0.0185, 0.0193)	0.0183 (0.0179, 0.0186)	0.0183 (0.0180, 0.0187)	0.0184 (0.0181, 0.0187)	0.0184 (0.0180, 0.0188)	0.0196 (0.0192, 0.0201)	0.0179 (0.0176, 0.0181)	0.0183 (0.0179, 0.0186)	0.0180 (0.0177, 0.0183)	0.0176 (0.0174, 0.0179)	0.0193 (0.0188, 0.0197)	0.0190 (0.0186, 0.0194)	0.0192 (0.0187, 0.0196)	0.0180 (0.0177, 0.0183)	0.0173 (0.0170, 0.0176)	0.0172 (0.0169, 0.0175)	0.0184 (0.0181, 0.0186)	0.0181 (0.0178, 0.0183)	0.0197 (0.0193, 0.0201)	0.0193 (0.0189, 0.0197)	0.0195 (0.0173, 0.0218)	0.0191 (0.0184, 0.0197)
Coding	tau_nmbd2	0.0165 (0.0162, 0.0168)	0.0178 (0.0176, 0.0180)	0.0189 (0.0183, 0.0194)	0.0167 (0.0161, 0.0173)	0.0179 (0.0172, 0.0185)	0.0177 (0.0171, 0.0183)	0.0173 (0.0168, 0.0177)	0.0168 (0.0164, 0.0171)	0.0168 (0.0164, 0.0172)	0.0178 (0.0172, 0.0183)	0.0176 (0.0170, 0.0182)	0.0165 (0.0162, 0.0168)	0.0171 (0.0167, 0.0175)	0.0163 (0.0159, 0.0166)	0.0159 (0.0156, 0.0163)	0.0183 (0.0176, 0.0190)	0.0180 (0.0174, 0.0186)	0.0182 (0.0175, 0.0188)	0.0163 (0.0159, 0.0166)	0.0165 (0.0160, 0.0169)	0.0159 (0.0154, 0.0163)	0.0168 (0.0165, 0.0172)	0.0180 (0.0178, 0.0183)	0.0184 (0.0179, 0.0188)	0.0192 (0.0188, 0.0196)	0.0180 (0.0166, 0.0194)	0.0185 (0.0178, 0.0191)
Coding	tau_nmbd1	0.0146 (0.0143, 0.0149)	0.0150 (0.0147, 0.0153)	0.0155 (0.0149, 0.0161)	0.0142 (0.0137, 0.0148)	0.0142 (0.0135, 0.0148)	0.0151 (0.0146, 0.0156)	0.0145 (0.0141, 0.0150)	0.0142 (0.0138, 0.0146)	0.0142 (0.0138, 0.0146)	0.0148 (0.0142, 0.0153)	0.0153 (0.0147, 0.0159)	0.0141 (0.0138, 0.0145)	0.0148 (0.0144, 0.0151)	0.0147 (0.0143, 0.0150)	0.0142 (0.0138, 0.0146)	0.0158 (0.0153, 0.0164)	0.0150 (0.0145, 0.0156)	0.0156 (0.0150, 0.0162)	0.0147 (0.0143, 0.0150)	0.0142 (0.0139, 0.0146)	0.0142 (0.0138, 0.0147)	0.0147 (0.0144, 0.0150)	0.0151 (0.0148, 0.0154)	0.0163 (0.0158, 0.0168)	0.0167 (0.0162, 0.0171)	0.0172 (0.0156, 0.0188)	0.0168 (0.0161, 0.0175)
Coding	tau_nmb	0.0134 (0.0129, 0.0139)	0.0135 (0.0130, 0.0140)	0.0148 (0.0141, 0.0154)	0.0134 (0.0128, 0.0140)	0.0137 (0.0131, 0.0143)	0.0145 (0.0140, 0.0150)	0.0142 (0.0137, 0.0146)	0.0137 (0.0133, 0.0141)	0.0137 (0.0133, 0.0141)	0.0139 (0.0134, 0.0145)	0.0147 (0.0140, 0.0153)	0.0136 (0.0132, 0.0140)	0.0143 (0.0139, 0.0147)	0.0144 (0.0140, 0.0147)	0.0135 (0.0131, 0.0140)	0.0154 (0.0149, 0.0160)	0.0143 (0.0138, 0.0149)	0.0152 (0.0146, 0.0158)	0.0141 (0.0137, 0.0146)	0.0138 (0.0133, 0.0142)	0.0134 (0.0129, 0.0139)	0.0139 (0.0134, 0.0144)	0.0140 (0.0135, 0.0146)	0.0141 (0.0133, 0.0149)	0.0141 (0.0133, 0.0150)	0.0146 (0.0124, 0.0166)	0.0145 (0.0135, 0.0155)
Coding	tau_nm	0.0039 (0.0037, 0.0041)	0.0039 (0.0038, 0.0041)	0.0042 (0.0038, 0.0047)	0.0039 (0.0036, 0.0042)	0.0044 (0.0042, 0.0047)	0.0038 (0.0035, 0.0041)	0.0034 (0.0031, 0.0036)	0.0030 (0.0028, 0.0032)	0.0030 (0.0028, 0.0032)	0.0043 (0.0041, 0.0046)	0.0036 (0.0031, 0.0041)	0.0036 (0.0034, 0.0038)	0.0031 (0.0028, 0.0033)	0.0008 (0.0006, 0.0011)	0.0042 (0.0040, 0.0044)	0.0034 (0.0028, 0.0039)	0.0043 (0.0041, 0.0046)	0.0036 (0.0033, 0.0040)	0.0034 (0.0032, 0.0036)	0.0022 (0.0018, 0.0026)	0.0038 (0.0036, 0.0040)	0.0039 (0.0037, 0.0041)	0.0039 (0.0037, 0.0041)	0.0058 (0.0054, 0.0062)	0.0058 (0.0054, 0.0062)	0.0071 (0.0053, 0.0088)	0.0055 (0.0048, 0.0061)
Coding	tau_es2	0.0165 (0.0162, 0.0168)	0.0178 (0.0176, 0.0180)	0.0189 (0.0183, 0.0194)	0.0167 (0.0161, 0.0173)	0.0179 (0.0172, 0.0185)	0.0177 (0.0171, 0.0183)	0.0173 (0.0168, 0.0177)	0.0168 (0.0164, 0.0171)	0.0168 (0.0164, 0.0172)	0.0178 (0.0172, 0.0183)	0.0176 (0.0170, 0.0182)	0.0165 (0.0162, 0.0168)	0.0171 (0.0167, 0.0175)	0.0163 (0.0159, 0.0166)	0.0159 (0.0156, 0.0163)	0.0183 (0.0176, 0.0190)	0.0180 (0.0174, 0.0186)	0.0182 (0.0175, 0.0188)	0.0163 (0.0159, 0.0166)	0.0165 (0.0160, 0.0169)	0.0159 (0.0154, 0.0163)	0.0168 (0.0165, 0.0172)	0.0180 (0.0178, 0.0183)	0.0184 (0.0179, 0.0188)	0.0192 (0.0188, 0.0196)	0.0180 (0.0166, 0.0194)	0.0185 (0.0178, 0.0191)
Coding	tau_es1	0.0102 (0.0099, 0.0104)	0.0098 (0.0096, 0.0101)	0.0108 (0.0103, 0.0114)	0.0101 (0.0096, 0.0107)	0.0105 (0.0100, 0.0110)	0.0105 (0.0101, 0.0110)	0.0105 (0.0100, 0.0109)	0.0101 (0.0098, 0.0104)	0.0101 (0.0098, 0.0104)	0.0115 (0.0111, 0.0120)	0.0110 (0.0105, 0.0116)	0.0096 (0.0093, 0.0099)	0.0100 (0.0097, 0.0103)	0.0103 (0.0099, 0.0106)	0.0097 (0.0094, 0.0101)	0.0114 (0.0110, 0.0118)	0.0109 (0.0104, 0.0113)	0.0107 (0.0102, 0.0112)	0.0100 (0.0097, 0.0104)	0.0094 (0.0090, 0.0097)	0.0102 (0.0099, 0.0105)	0.0096 (0.0093, 0.0098)	0.0094 (0.0091, 0.0096)	0.0097 (0.0092, 0.0102)	0.0096 (0.0091, 0.0101)	0.0085 (0.0064, 0.0105)	0.0095 (0.0086, 0.0103)
Coding	tau_r	0.0320 (0.0316, 0.0325)	0.0322 (0.0318, 0.0327)	0.0345 (0.0337, 0.0352)	0.0312 (0.0305, 0.0319)	0.0329 (0.0322, 0.0336)	0.0337 (0.0330, 0.0343)	0.0328 (0.0322, 0.0334)	0.0330 (0.0325, 0.0336)	0.0330 (0.0325, 0.0336)	0.0331 (0.0325, 0.0337)	0.0333 (0.0325, 0.0340)	0.0321 (0.0317, 0.0326)	0.0321 (0.0317, 0.0326)	0.0328 (0.0323, 0.0333)	0.0314 (0.0308, 0.0319)	0.0345 (0.0338, 0.0351)	0.0339 (0.0332, 0.0345)	0.0345 (0.0337, 0.0352)	0.0319 (0.0314, 0.0325)	0.0308 (0.0303, 0.0314)	0.0345 (0.0339, 0.0351)	0.0318 (0.0313, 0.0323)	0.0321 (0.0316, 0.0326)	0.0340 (0.0332, 0.0348)	0.0342 (0.0335, 0.0350)	0.0326 (0.0299, 0.0354)	0.0327 (0.0315, 0.0338)
Coding	theta_nmbdaes	0.0053 (0.0045, 0.0061)	0.0069 (0.0061, 0.0077)	0.0073 (0.0057, 0.0089)	0.0041 (0.0022, 0.0061)	0.0074 (0.0059, 0.0088)	0.0060 (0.0049, 0.0070)	0.0056 (0.0045, 0.0066)	0.0055 (0.0046, 0.0064)	0.0051 (0.0042, 0.0060)	0.0052 (0.0041, 0.0064)	0.0058 (0.0045, 0.0072)	0.0050 (0.0042, 0.0058)	0.0047 (0.0038, 0.0056)	0.0057 (0.0048, 0.0065)	0.0046 (0.0037, 0.0055)	0.0065 (0.0053, 0.0078)	0.0051 (0.0040, 0.0062)	0.0059 (0.0046, 0.0072)	0.0050 (0.0041, 0.0060)	0.0052 (0.0036, 0.0067)	0.0069 (0.0062, 0.0077)	0.0047 (0.0037, 0.0058)	0.0068 (0.0060, 0.0076)	0.0052 (0.0036, 0.0069)	0.0080 (0.0066, 0.0093)	0.0085 (0.0029, 0.0137)	0.0042 (0.0017, 0.0075)
Coding	theta_nmbda	0.0149 (0.0140, 0.0160)	0.0083 (0.0068, 0.0099)	0.0183 (0.0161, 0.0205)	0.0155 (0.0137, 0.0175)	0.0192 (0.0166, 0.0218)	0.0162 (0.0145, 0.0180)	0.0161 (0.0146, 0.0176)	0.0161 (0.0149, 0.0175)	0.0161 (0.0148, 0.0173)	0.0183 (0.0163, 0.0204)	0.0155 (0.0134, 0.0175)	0.0147 (0.0138, 0.0158)	0.0164 (0.0150, 0.0177)	0.0156 (0.0145, 0.0168)	0.0153 (0.0142, 0.0165)	0.0190 (0.0168, 0.0212)	0.0160 (0.0144, 0.0177)	0.0164 (0.0147, 0.0183)	0.0154 (0.0141, 0.0167)	0.0154 (0.0142, 0.0166)	0.0158 (0.0145, 0.0171)	0.0149 (0.0138, 0.0159)	0.0076 (0.0061, 0.0091)	0.0151 (0.0135, 0.0168)	0.0063 (0.0042, 0.0086)	0.0203 (0.0073, 0.0368)	0.0152 (0.0127, 0.0177)
Coding	theta_nmbd2	0.0196 (0.0171, 0.0223)	0.0153 (0.0132, 0.0175)	0.0305 (0.0236, 0.0379)	0.0289 (0.0229, 0.0350)	0.0350 (0.0273, 0.0430)	0.0279 (0.0228, 0.0332)	0.0263 (0.0217, 0.0310)	0.0268 (0.0233, 0.0306)	0.0272 (0.0236, 0.0310)	0.0325 (0.0258, 0.0393)	0.0254 (0.0207, 0.0304)	0.0237 (0.0206, 0.0268)	0.0261 (0.0221, 0.0300)	0.0271 (0.0233, 0.0311)	0.0247 (0.0210, 0.0287)	0.0329 (0.0259, 0.0405)	0.0396 (0.0314, 0.0479)	0.0303 (0.0236, 0.0375)	0.0249 (0.0210, 0.0287)	0.0215 (0.0179, 0.0253)	0.0296 (0.0236, 0.0356)	0.0187 (0.0164, 0.0210)	0.0153 (0.0131, 0.0174)	0.0118 (0.0096, 0.0141)	0.0099 (0.0077, 0.0121)	0.0227 (0.0087, 0.0420)	0.0120 (0.0075, 0.0167)
Coding	theta_nmbd1	0.0196 (0.0171, 0.0223)	0.0153 (0.0132, 0.0175)	0.0305 (0.0236, 0.0379)	0.0289 (0.0229, 0.0350)	0.0350 (0.0273, 0.0430)	0.0279 (0.0228, 0.0332)	0.0263 (0.0217, 0.0310)	0.0268 (0.0233, 0.0306)	0.0272 (0.0236, 0.0310)	0.0325 (0.0258, 0.0393)	0.0254 (0.0207, 0.0304)	0.0237 (0.0206, 0.0268)	0.0261 (0.0221, 0.0300)	0.0271 (0.0233, 0.0311)	0.0247 (0.0210, 0.0287)	0.0329 (0.0259, 0.0405)	0.0396 (0.0314, 0.0479)	0.0303 (0.0236, 0.0375)	0.0249 (0.0210, 0.0287)	0.0215 (0.0179, 0.0253)	0.0296 (0.0236, 0.0356)	0.0187 (0.0164, 0.0210)	0.0153 (0.0131, 0.0174)	0.0118 (0.0096, 0.0141)	0.0099 (0.0077, 0.0121)	0.0224 (0.0071, 0.0411)	0.0120 (0.0075, 0.0167)
Coding	theta_nmb	0.0171 (0.0085, 0.0259)	0.0210 (0.0129, 0.0304)	0.0154 (0.0047, 0.0274)	0.0201 (0.0065, 0.0351)	0.0163 (0.0038, 0.0306)	0.0131 (0.0036, 0.0237)	0.0196 (0.0049, 0.0360)	0.0146 (0.0044, 0.0261)	0.0143 (0.0043, 0.0256)	0.0207 (0.0068, 0.0351)	0.0170 (0.0045, 0.0312)	0.0166 (0.0053, 0.0287)	0.0091 (0.0026, 0.0163)	0.0045 (0.0012, 0.0083)	0.0207 (0.0070, 0.0353)	0.0133 (0.0032, 0.0255)	0.0121 (0.0040, 0.0214)	0.0189 (0.0045, 0.0355)	0.0104 (0.0032, 0.0185)	0.0130 (0.0036, 0.0235)	0.0205 (0.0073, 0.0344)	0.0187 (0.0072, 0.0307)	0.0229 (0.0101, 0.0365)	0.0146 (0.0077, 0.0220)	0.0159 (0.0089, 0.0232)	0.0192 (0.0044, 0.0363)	0.0103 (0.0044, 0.0166)
Coding	theta_nm	0.0068 (0.0064, 0.0072)	0.0068 (0.0063, 0.0072)	0.0099 (0.0087, 0.0110)	0.0078 (0.0071, 0.0085)	0.0073 (0.0066, 0.0080)	0.0089 (0.0081, 0.0097)	0.0091 (0.0083, 0.0098)	0.0101 (0.0094, 0.0108)	0.0101 (0.0094, 0.0108)	0.0080 (0.0074, 0.0086)	0.0096 (0.0083, 0.0108)	0.0081 (0.0075, 0.0086)	0.0094 (0.0086, 0.0101)	0.0149 (0.0141, 0.0157)	0.0073 (0.0068, 0.0077)	0.0110 (0.0096, 0.0124)	0.0088 (0.0081, 0.0095)	0.0085 (0.0077, 0.0093)	0.0082 (0.0077, 0.0088)	0.0103 (0.0093, 0.0113)	0.0082 (0.0076, 0.0087)	0.0067 (0.0063, 0.0072)	0.0067 (0.0063, 0.0072)	0.0054 (0.0046, 0.0062)	0.0053 (0.0045, 0.0061)	0.0056 (0.0021, 0.0093)	0.0062 (0.0048, 0.0077)
Coding	theta_es2	0.0053 (0.0048, 0.0059)	0.0067 (0.0061, 0.0072)	0.0089 (0.0077, 0.0101)	0.0063 (0.0052, 0.0073)	0.0067 (0.0057, 0.0077)	0.0060 (0.0052, 0.0069)	0.0062 (0.0053, 0.0071)	0.0057 (0.0051, 0.0063)	0.0057 (0.0051, 0.0063)	0.0058 (0.0049, 0.0067)	0.0059 (0.0049, 0.0070)	0.0064 (0.0058, 0.0070)	0.0062 (0.0056, 0.0068)	0.0059 (0.0053, 0.0065)	0.0061 (0.0054, 0.0068)	0.0060 (0.0052, 0.0068)	0.0064 (0.0055, 0.0073)	0.0068 (0.0058, 0.0078)	0.0056 (0.0050, 0.0063)	0.0060 (0.0053, 0.0067)	0.0052 (0.0046, 0.0058)	0.0065 (0.0059, 0.0070)	0.0075 (0.0069, 0.0080)	0.0070 (0.0060, 0.0080)	0.0075 (0.0065, 0.0084)	0.0115 (0.0065, 0.0169)	0.0074 (0.0057, 0.0092)
Coding	theta_es1	0.0053 (0.0048, 0.0059)	0.0067 (0.0061, 0.0072)	0.0089 (0.0077, 0.0101)	0.0063 (0.0052, 0.0073)	0.0067 (0.0057, 0.0077)	0.0060 (0.0052, 0.0069)	0.0062 (0.0053, 0.0071)	0.0057 (0.0051, 0.0063)	0.0057 (0.0051, 0.0063)	0.0058 (0.0049, 0.0067)	0.0059 (0.0049, 0.0070)	0.0064 (0.0058, 0.0070)	0.0062 (0.0056, 0.0068)	0.0059 (0.0053, 0.0065)	0.0061 (0.0054, 0.0068)	0.0060 (0.0052, 0.0068)	0.0064 (0.0055, 0.0073)	0.0068 (0.0058, 0.0078)	0.0056 (0.0050, 0.0063)	0.0060 (0.0053, 0.0067)	0.0052 (0.0046, 0.0058)	0.0065 (0.0059, 0.0070)	0.0075 (0.0069, 0.0080)	0.0070 (0.0060, 0.0080)	0.0075 (0.0065, 0.0084)	0.0117 (0.0065, 0.0175)	0.0074 (0.0057, 0.0092)
Coding	theta_Aoe	0.0056 (0.0053, 0.0058)	0.0056 (0.0053, 0.0059)	0.0071 (0.0065, 0.0077)	0.0055 (0.0051, 0.0060)	0.0061 (0.0056, 0.0066)	0.0062 (0.0058, 0.0067)	0.0063 (0.0059, 0.0067)	0.0061 (0.0057, 0.0064)	0.0061 (0.0057, 0.0064)	0.0060 (0.0056, 0.0064)	0.0064 (0.0059, 0.0069)	0.0059 (0.0056, 0.0062)	0.0057 (0.0054, 0.0060)	0.0057 (0.0054, 0.0060)	0.0060 (0.0057, 0.0063)	0.0066 (0.0061, 0.0071)	0.0062 (0.0057, 0.0066)	0.0056 (0.0052, 0.0061)	0.0053 (0.0050, 0.0056)	0.0054 (0.0051, 0.0057)	0.0060 (0.0057, 0.0063)	0.0055 (0.0052, 0.0058)	0.0055 (0.0052, 0.0058)	n/a	n/a	n/a	n/a
Coding	theta_Num	0.0103 (0.0095, 0.0110)	0.0103 (0.0095, 0.0110)	0.0126 (0.0110, 0.0143)	0.0142 (0.0124, 0.0161)	0.0150 (0.0131, 0.0170)	0.0003 (0.0003, 0.0004)	0.0168 (0.0146, 0.0191)	0.0045 (0.0042, 0.0049)	0.0045 (0.0041, 0.0049)	0.0143 (0.0128, 0.0158)	0.0063 (0.0055, 0.0071)	0.0083 (0.0078, 0.0089)	0.0006 (0.0005, 0.0006)	0.0008 (0.0007, 0.0010)	0.0090 (0.0083, 0.0096)	0.0005 (0.0004, 0.0006)	0.0138 (0.0124, 0.0153)	0.0167 (0.0142, 0.0193)	0.0056 (0.0052, 0.0060)	0.0025 (0.0021, 0.0028)	0.0068 (0.0063, 0.0073)	0.0113 (0.0104, 0.0122)	0.0113 (0.0104, 0.0122)	n/a	n/a	n/a	n/a
Coding	theta_Mel	0.0028 (0.0027, 0.0030)	0.0028 (0.0027, 0.0030)	0.0007 (0.0006, 0.0008)	0.0041 (0.0037, 0.0045)	0.0051 (0.0046, 0.0055)	0.0081 (0.0073, 0.0089)	0.0011 (0.0010, 0.0012)	0.0032 (0.0030, 0.0034)	0.0032 (0.0030, 0.0034)	0.0058 (0.0053, 0.0062)	0.0008 (0.0007, 0.0009)	0.0005 (0.0005, 0.0006)	0.0043 (0.0040, 0.0046)	0.0009 (0.0008, 0.0011)	0.0066 (0.0062, 0.0071)	0.0042 (0.0036, 0.0047)	0.0052 (0.0048, 0.0056)	0.0014 (0.0012, 0.0015)	0.0043 (0.0040, 0.0046)	0.0003 (0.0003, 0.0004)	0.0038 (0.0036, 0.0041)	0.0036 (0.0034, 0.0038)	0.0036 (0.0034, 0.0038)	n/a	n/a	n/a	n/a
Coding	theta_Bur	0.0038 (0.0036, 0.0040)	0.0038 (0.0036, 0.0040)	0.0055 (0.0050, 0.0059)	0.0056 (0.0052, 0.0060)	0.0053 (0.0048, 0.0057)	0.0055 (0.0051, 0.0059)	0.0054 (0.0051, 0.0058)	0.0047 (0.0044, 0.0050)	0.0047 (0.0044, 0.0050)	0.0048 (0.0044, 0.0051)	0.0051 (0.0046, 0.0055)	0.0044 (0.0042, 0.0046)	0.0043 (0.0040, 0.0045)	0.0045 (0.0043, 0.0048)	0.0043 (0.0040, 0.0045)	0.0053 (0.0049, 0.0057)	0.0050 (0.0046, 0.0054)	0.0051 (0.0047, 0.0055)	0.0039 (0.0037, 0.0041)	0.0041 (0.0038, 0.0044)	0.0046 (0.0043, 0.0048)	0.0041 (0.0038, 0.0043)	0.0040 (0.0038, 0.0043)	n/a	n/a	n/a	n/a
Coding	theta_Dor	0.0021 (0.0020, 0.0022)	0.0021 (0.0019, 0.0022)	0.0026 (0.0024, 0.0029)	0.0025 (0.0023, 0.0028)	0.0025 (0.0022, 0.0027)	0.0022 (0.0020, 0.0025)	0.0026 (0.0024, 0.0028)	0.0027 (0.0025, 0.0028)	0.0027 (0.0025, 0.0028)	0.0023 (0.0021, 0.0025)	0.0027 (0.0024, 0.0030)	0.0024 (0.0023, 0.0025)	0.0024 (0.0023, 0.0026)	0.0028 (0.0027, 0.0030)	0.0024 (0.0022, 0.0026)	0.0024 (0.0022, 0.0027)	0.0028 (0.0026, 0.0031)	0.0024 (0.0022, 0.0027)	0.0023 (0.0022, 0.0025)	0.0027 (0.0025, 0.0028)	0.0025 (0.0023, 0.0026)	0.0022 (0.0021, 0.0023)	0.0022 (0.0021, 0.0023)	n/a	n/a	n/a	n/a
Coding	theta_Era	0.0064 (0.0061, 0.0067)	0.0064 (0.0061, 0.0067)	0.0127 (0.0115, 0.0138)	0.0001 (0.0000, 0.0001)	0.0097 (0.0089, 0.0106)	0.0093 (0.0086, 0.0100)	0.0029 (0.0027, 0.0032)	0.0106 (0.0100, 0.0113)	0.0106 (0.0100, 0.0113)	0.0004 (0.0003, 0.0005)	0.0042 (0.0038, 0.0046)	0.0068 (0.0064, 0.0071)	0.0118 (0.0111, 0.0124)	0.0104 (0.0099, 0.0110)	0.0001 (0.0000, 0.0001)	0.0146 (0.0135, 0.0158)	0.0035 (0.0032, 0.0038)	0.0002 (0.0001, 0.0002)	0.0002 (0.0002, 0.0002)	0.0080 (0.0075, 0.0085)	0.0072 (0.0068, 0.0076)	0.0087 (0.0082, 0.0091)	0.0086 (0.0082, 0.0091)	n/a	n/a	n/a	n/a
Coding	theta_Sar	0.0040 (0.0038, 0.0042)	0.0040 (0.0038, 0.0042)	0.0047 (0.0043, 0.0051)	0.0048 (0.0044, 0.0052)	0.0047 (0.0043, 0.0051)	0.0047 (0.0043, 0.0051)	0.0045 (0.0042, 0.0048)	0.0040 (0.0038, 0.0043)	0.0040 (0.0038, 0.0043)	0.0046 (0.0042, 0.0049)	0.0050 (0.0046, 0.0055)	0.0039 (0.0037, 0.0041)	0.0042 (0.0039, 0.0044)	0.0041 (0.0039, 0.0043)	0.0041 (0.0038, 0.0043)	0.0050 (0.0046, 0.0054)	0.0047 (0.0044, 0.0051)	0.0046 (0.0042, 0.0050)	0.0040 (0.0037, 0.0042)	0.0037 (0.0035, 0.0039)	0.0038 (0.0035, 0.0040)	0.0037 (0.0035, 0.0039)	0.0037 (0.0035, 0.0039)	n/a	n/a	n/a	n/a
Coding	theta_Tal	0.0055 (0.0052, 0.0057)	0.0055 (0.0052, 0.0057)	0.0063 (0.0057, 0.0068)	0.0063 (0.0058, 0.0067)	0.0067 (0.0062, 0.0073)	0.0058 (0.0053, 0.0062)	0.0067 (0.0063, 0.0071)	0.0064 (0.0060, 0.0067)	0.0064 (0.0060, 0.0067)	0.0052 (0.0048, 0.0056)	0.0057 (0.0052, 0.0062)	0.0059 (0.0057, 0.0062)	0.0053 (0.0050, 0.0056)	0.0068 (0.0064, 0.0071)	0.0065 (0.0062, 0.0069)	0.0062 (0.0058, 0.0067)	0.0080 (0.0075, 0.0086)	0.0069 (0.0063, 0.0074)	0.0057 (0.0054, 0.0060)	0.0062 (0.0058, 0.0066)	0.0060 (0.0056, 0.0063)	0.0052 (0.0049, 0.0055)	0.0052 (0.0049, 0.0055)	n/a	n/a	n/a	n/a
Coding	theta_r	0.0155 (0.0146, 0.0165)	0.0153 (0.0143, 0.0162)	0.0147 (0.0131, 0.0164)	0.0168 (0.0152, 0.0185)	0.0143 (0.0129, 0.0158)	0.0151 (0.0137, 0.0165)	0.0163 (0.0149, 0.0177)	0.0188 (0.0175, 0.0201)	0.0189 (0.0176, 0.0202)	0.0152 (0.0139, 0.0166)	0.0157 (0.0141, 0.0173)	0.0171 (0.0161, 0.0182)	0.0132 (0.0122, 0.0142)	0.0165 (0.0154, 0.0176)	0.0173 (0.0161, 0.0185)	0.0157 (0.0144, 0.0172)	0.0162 (0.0149, 0.0177)	0.0164 (0.0148, 0.0180)	0.0164 (0.0153, 0.0175)	0.0178 (0.0166, 0.0191)	0.0171 (0.0159, 0.0184)	0.0162 (0.0152, 0.0173)	0.0157 (0.0147, 0.0167)	0.0146 (0.0130, 0.0162)	0.0143 (0.0128, 0.0159)	0.0191 (0.0128, 0.0254)	0.0187 (0.0160, 0.0215)
Noncoding	phi_es2<-nmbd2	0.7078 (0.6342, 0.7780)	n/a	n/a	0.5941 (0.4073, 0.7741)	0.6266 (0.4905, 0.7565)	0.6346 (0.5100, 0.7526)	0.6380 (0.5356, 0.7382)	0.7260 (0.6030, 0.8402)	n/a	0.4679 (0.2931, 0.6409)	0.6686 (0.5299, 0.7974)	0.7959 (0.7153, 0.8717)	0.6320 (0.4834, 0.7700)	0.6677 (0.5668, 0.7649)	0.7206 (0.6448, 0.7919)	0.6808 (0.5542, 0.8075)	0.5827 (0.4000, 0.7496)	0.7052 (0.5837, 0.8210)	0.6339 (0.5231, 0.7389)	0.6084 (0.5141, 0.6988)	0.7272 (0.6463, 0.8043)	0.6116 (0.5036, 0.7165)	n/a	0.3578 (0.1504, 0.5683)	n/a	0.2478 (0.0000, 0.6299)	0.6104 (0.1338, 0.9999)
Noncoding	phi_nmbd2<-es2	0.0215 (0.0000, 0.0470)	n/a	n/a	0.0477 (0.0000, 0.1201)	0.0489 (0.0000, 0.1061)	0.0571 (0.0001, 0.1167)	0.0268 (0.0000, 0.0582)	0.0315 (0.0000, 0.0653)	n/a	0.0274 (0.0000, 0.0748)	0.0315 (0.0000, 0.0785)	0.0211 (0.0000, 0.0512)	0.0326 (0.0000, 0.0779)	0.0285 (0.0000, 0.0601)	0.0448 (0.0093, 0.0803)	0.0418 (0.0000, 0.0990)	0.0230 (0.0000, 0.0632)	0.0478 (0.0000, 0.0963)	0.0286 (0.0000, 0.0598)	0.0167 (0.0000, 0.0398)	0.0307 (0.0004, 0.0585)	0.0186 (0.0000, 0.0467)	n/a	0.0621 (0.0000, 0.1505)	n/a	0.7300 (0.3579, 1.0000)	0.1449 (0.0000, 0.3959)
Noncoding	tau_nmbdaes	0.0202 (0.0194, 0.0210)	n/a	n/a	0.0221 (0.0207, 0.0236)	0.0232 (0.0219, 0.0245)	0.0220 (0.0209, 0.0230)	0.0210 (0.0199, 0.0220)	0.0200 (0.0187, 0.0212)	n/a	0.0209 (0.0197, 0.0222)	0.0228 (0.0212, 0.0244)	0.0223 (0.0212, 0.0233)	0.0217 (0.0204, 0.0229)	0.0211 (0.0201, 0.0221)	0.0216 (0.0207, 0.0225)	0.0228 (0.0215, 0.0241)	0.0219 (0.0205, 0.0233)	0.0221 (0.0208, 0.0234)	0.0203 (0.0193, 0.0213)	0.0202 (0.0194, 0.0210)	0.0200 (0.0189, 0.0211)	0.0205 (0.0195, 0.0214)	n/a	0.0187 (0.0179, 0.0195)	n/a	0.0313 (0.0235, 0.0399)	0.0192 (0.0168, 0.0220)
Noncoding	tau_nmbda	0.0157 (0.0154, 0.0160)	n/a	n/a	0.0180 (0.0173, 0.0188)	0.0188 (0.0180, 0.0196)	0.0170 (0.0164, 0.0175)	0.0162 (0.0157, 0.0167)	0.0158 (0.0154, 0.0162)	n/a	0.0168 (0.0161, 0.0174)	0.0175 (0.0167, 0.0183)	0.0172 (0.0168, 0.0176)	0.0173 (0.0167, 0.0178)	0.0166 (0.0162, 0.0170)	0.0169 (0.0165, 0.0173)	0.0176 (0.0169, 0.0182)	0.0173 (0.0167, 0.0180)	0.0168 (0.0163, 0.0174)	0.0160 (0.0156, 0.0164)	0.0162 (0.0158, 0.0165)	0.0154 (0.0150, 0.0158)	0.0162 (0.0157, 0.0166)	n/a	0.0176 (0.0160, 0.0190)	n/a	0.0279 (0.0214, 0.0346)	0.0168 (0.0156, 0.0180)
Noncoding	tau_nmbd2	0.0145 (0.0141, 0.0149)	n/a	n/a	0.0173 (0.0163, 0.0182)	0.0167 (0.0159, 0.0175)	0.0162 (0.0155, 0.0169)	0.0146 (0.0140, 0.0152)	0.0147 (0.0142, 0.0152)	n/a	0.0157 (0.0146, 0.0167)	0.0158 (0.0148, 0.0169)	0.0159 (0.0154, 0.0163)	0.0160 (0.0151, 0.0168)	0.0151 (0.0146, 0.0157)	0.0155 (0.0150, 0.0159)	0.0161 (0.0150, 0.0172)	0.0165 (0.0154, 0.0175)	0.0158 (0.0150, 0.0166)	0.0149 (0.0143, 0.0154)	0.0147 (0.0142, 0.0152)	0.0135 (0.0130, 0.0140)	0.0147 (0.0140, 0.0154)	n/a	0.0160 (0.0151, 0.0170)	n/a	0.0248 (0.0188, 0.0305)	0.0161 (0.0147, 0.0173)
Noncoding	tau_nmbd1	0.0136 (0.0132, 0.0140)	n/a	n/a	0.0163 (0.0154, 0.0171)	0.0164 (0.0156, 0.0172)	0.0151 (0.0144, 0.0158)	0.0140 (0.0134, 0.0146)	0.0139 (0.0134, 0.0144)	n/a	0.0145 (0.0136, 0.0154)	0.0147 (0.0138, 0.0156)	0.0147 (0.0142, 0.0151)	0.0150 (0.0143, 0.0157)	0.0147 (0.0142, 0.0152)	0.0148 (0.0144, 0.0153)	0.0145 (0.0135, 0.0155)	0.0148 (0.0139, 0.0157)	0.0149 (0.0142, 0.0155)	0.0142 (0.0137, 0.0147)	0.0140 (0.0135, 0.0144)	0.0133 (0.0128, 0.0137)	0.0141 (0.0136, 0.0146)	n/a	0.0156 (0.0147, 0.0165)	n/a	0.0230 (0.0172, 0.0288)	0.0150 (0.0137, 0.0162)
Noncoding	tau_nmb	0.0121 (0.0114, 0.0129)	n/a	n/a	0.0152 (0.0142, 0.0162)	0.0159 (0.0149, 0.0169)	0.0128 (0.0117, 0.0139)	0.0127 (0.0117, 0.0137)	0.0127 (0.0119, 0.0135)	n/a	0.0131 (0.0120, 0.0141)	0.0137 (0.0127, 0.0147)	0.0134 (0.0125, 0.0142)	0.0138 (0.0128, 0.0148)	0.0137 (0.0131, 0.0144)	0.0136 (0.0128, 0.0143)	0.0138 (0.0127, 0.0148)	0.0144 (0.0135, 0.0153)	0.0139 (0.0130, 0.0147)	0.0125 (0.0116, 0.0133)	0.0130 (0.0124, 0.0136)	0.0118 (0.0110, 0.0125)	0.0127 (0.0119, 0.0136)	n/a	0.0137 (0.0122, 0.0151)	n/a	0.0204 (0.0136, 0.0271)	0.0129 (0.0111, 0.0146)
Noncoding	tau_nm	0.0035 (0.0032, 0.0037)	n/a	n/a	0.0042 (0.0037, 0.0047)	0.0040 (0.0035, 0.0045)	0.0041 (0.0036, 0.0046)	0.0037 (0.0034, 0.0041)	0.0036 (0.0033, 0.0039)	n/a	0.0042 (0.0038, 0.0046)	0.0035 (0.0027, 0.0043)	0.0042 (0.0038, 0.0045)	0.0035 (0.0030, 0.0040)	0.0024 (0.0018, 0.0030)	0.0038 (0.0036, 0.0041)	0.0036 (0.0029, 0.0042)	0.0041 (0.0037, 0.0046)	0.0035 (0.0030, 0.0040)	0.0037 (0.0035, 0.0040)	0.0038 (0.0034, 0.0041)	0.0040 (0.0037, 0.0043)	0.0042 (0.0039, 0.0045)	n/a	0.0043 (0.0033, 0.0053)	n/a	0.0063 (0.0002, 0.0113)	0.0058 (0.0044, 0.0071)
Noncoding	tau_es2	0.0145 (0.0141, 0.0149)	n/a	n/a	0.0173 (0.0163, 0.0182)	0.0167 (0.0159, 0.0175)	0.0162 (0.0155, 0.0169)	0.0146 (0.0140, 0.0152)	0.0147 (0.0142, 0.0152)	n/a	0.0157 (0.0146, 0.0167)	0.0158 (0.0148, 0.0169)	0.0159 (0.0154, 0.0163)	0.0160 (0.0151, 0.0168)	0.0151 (0.0146, 0.0157)	0.0155 (0.0150, 0.0159)	0.0161 (0.0150, 0.0172)	0.0165 (0.0154, 0.0175)	0.0158 (0.0150, 0.0166)	0.0149 (0.0143, 0.0154)	0.0147 (0.0142, 0.0152)	0.0135 (0.0130, 0.0140)	0.0147 (0.0140, 0.0154)	n/a	0.0160 (0.0151, 0.0170)	n/a	0.0248 (0.0188, 0.0305)	0.0161 (0.0147, 0.0173)
Noncoding	tau_es1	0.0080 (0.0076, 0.0084)	n/a	n/a	0.0096 (0.0084, 0.0107)	0.0091 (0.0080, 0.0101)	0.0088 (0.0081, 0.0095)	0.0088 (0.0081, 0.0095)	0.0082 (0.0077, 0.0087)	n/a	0.0088 (0.0079, 0.0097)	0.0099 (0.0089, 0.0109)	0.0084 (0.0079, 0.0089)	0.0086 (0.0079, 0.0093)	0.0085 (0.0079, 0.0090)	0.0090 (0.0084, 0.0095)	0.0090 (0.0080, 0.0099)	0.0098 (0.0088, 0.0108)	0.0089 (0.0081, 0.0097)	0.0087 (0.0081, 0.0092)	0.0090 (0.0086, 0.0094)	0.0072 (0.0067, 0.0077)	0.0083 (0.0078, 0.0088)	n/a	0.0068 (0.0056, 0.0079)	n/a	0.0102 (0.0015, 0.0181)	0.0055 (0.0040, 0.0071)
Noncoding	tau_r	0.0222 (0.0216, 0.0227)	n/a	n/a	0.0254 (0.0243, 0.0265)	0.0253 (0.0243, 0.0264)	0.0236 (0.0229, 0.0244)	0.0238 (0.0230, 0.0246)	0.0231 (0.0223, 0.0238)	n/a	0.0237 (0.0229, 0.0246)	0.0258 (0.0247, 0.0270)	0.0253 (0.0246, 0.0261)	0.0242 (0.0234, 0.0250)	0.0234 (0.0227, 0.0241)	0.0240 (0.0233, 0.0246)	0.0252 (0.0242, 0.0262)	0.0257 (0.0247, 0.0268)	0.0243 (0.0235, 0.0252)	0.0229 (0.0224, 0.0235)	0.0233 (0.0228, 0.0239)	0.0236 (0.0227, 0.0244)	0.0225 (0.0218, 0.0231)	n/a	0.0243 (0.0231, 0.0256)	n/a	0.0388 (0.0296, 0.0482)	0.0247 (0.0229, 0.0264)
Noncoding	theta_nmbdaes	0.0014 (0.0006, 0.0023)	n/a	n/a	0.0030 (0.0013, 0.0047)	0.0021 (0.0006, 0.0037)	0.0017 (0.0005, 0.0031)	0.0023 (0.0012, 0.0035)	0.0027 (0.0013, 0.0040)	n/a	0.0034 (0.0016, 0.0052)	0.0028 (0.0010, 0.0047)	0.0017 (0.0007, 0.0028)	0.0023 (0.0009, 0.0039)	0.0020 (0.0008, 0.0032)	0.0017 (0.0007, 0.0026)	0.0021 (0.0007, 0.0036)	0.0028 (0.0012, 0.0043)	0.0020 (0.0006, 0.0035)	0.0024 (0.0012, 0.0036)	0.0025 (0.0016, 0.0034)	0.0020 (0.0009, 0.0030)	0.0019 (0.0008, 0.0030)	n/a	0.0057 (0.0044, 0.0071)	n/a	0.0145 (0.0028, 0.0302)	0.0050 (0.0021, 0.0077)
Noncoding	theta_nmbda	0.0069 (0.0059, 0.0081)	n/a	n/a	0.0095 (0.0061, 0.0133)	0.0079 (0.0054, 0.0107)	0.0082 (0.0059, 0.0104)	0.0081 (0.0064, 0.0098)	0.0078 (0.0062, 0.0096)	n/a	0.0101 (0.0074, 0.0131)	0.0091 (0.0062, 0.0124)	0.0084 (0.0068, 0.0098)	0.0085 (0.0062, 0.0110)	0.0079 (0.0063, 0.0096)	0.0071 (0.0058, 0.0084)	0.0085 (0.0060, 0.0113)	0.0098 (0.0073, 0.0127)	0.0087 (0.0065, 0.0110)	0.0082 (0.0067, 0.0099)	0.0081 (0.0068, 0.0094)	0.0065 (0.0054, 0.0078)	0.0079 (0.0064, 0.0095)	n/a	0.0247 (0.0058, 0.0457)	n/a	0.0186 (0.0030, 0.0381)	0.0129 (0.0035, 0.0298)
Noncoding	theta_nmbd2	0.0107 (0.0078, 0.0138)	n/a	n/a	0.0154 (0.0067, 0.0251)	0.0143 (0.0073, 0.0223)	0.0115 (0.0059, 0.0175)	0.0136 (0.0081, 0.0196)	0.0098 (0.0065, 0.0134)	n/a	0.0202 (0.0101, 0.0314)	0.0216 (0.0124, 0.0320)	0.0098 (0.0073, 0.0124)	0.0135 (0.0074, 0.0201)	0.0114 (0.0073, 0.0158)	0.0121 (0.0081, 0.0165)	0.0234 (0.0126, 0.0352)	0.0196 (0.0105, 0.0295)	0.0151 (0.0082, 0.0228)	0.0118 (0.0074, 0.0163)	0.0156 (0.0111, 0.0202)	0.0138 (0.0089, 0.0190)	0.0134 (0.0083, 0.0189)	n/a	0.0061 (0.0040, 0.0084)	n/a	0.0191 (0.0034, 0.0388)	0.0105 (0.0030, 0.0190)
Noncoding	theta_nmbd1	0.0107 (0.0078, 0.0138)	n/a	n/a	0.0154 (0.0067, 0.0251)	0.0143 (0.0073, 0.0223)	0.0115 (0.0059, 0.0175)	0.0136 (0.0081, 0.0196)	0.0098 (0.0065, 0.0134)	n/a	0.0202 (0.0101, 0.0314)	0.0216 (0.0124, 0.0320)	0.0098 (0.0073, 0.0124)	0.0135 (0.0074, 0.0201)	0.0114 (0.0073, 0.0158)	0.0121 (0.0081, 0.0165)	0.0234 (0.0126, 0.0352)	0.0196 (0.0105, 0.0295)	0.0151 (0.0082, 0.0228)	0.0118 (0.0074, 0.0163)	0.0156 (0.0111, 0.0202)	0.0138 (0.0089, 0.0190)	0.0134 (0.0083, 0.0189)	n/a	0.0209 (0.0029, 0.0418)	n/a	0.0199 (0.0028, 0.0405)	0.0118 (0.0027, 0.0244)
Noncoding	theta_nmb	0.0256 (0.0104, 0.0423)	n/a	n/a	0.0191 (0.0052, 0.0357)	0.0241 (0.0059, 0.0456)	0.0203 (0.0082, 0.0336)	0.0270 (0.0085, 0.0474)	0.0164 (0.0044, 0.0297)	n/a	0.0206 (0.0064, 0.0363)	0.0172 (0.0046, 0.0316)	0.0195 (0.0061, 0.0339)	0.0226 (0.0061, 0.0411)	0.0097 (0.0028, 0.0175)	0.0170 (0.0062, 0.0293)	0.0232 (0.0062, 0.0434)	0.0238 (0.0060, 0.0445)	0.0130 (0.0033, 0.0240)	0.0234 (0.0091, 0.0388)	0.0169 (0.0057, 0.0294)	0.0190 (0.0077, 0.0311)	0.0191 (0.0063, 0.0333)	n/a	0.0154 (0.0035, 0.0298)	n/a	0.0230 (0.0054, 0.0435)	0.0209 (0.0055, 0.0390)
Noncoding	theta_nm	0.0051 (0.0046, 0.0056)	n/a	n/a	0.0068 (0.0057, 0.0079)	0.0072 (0.0059, 0.0084)	0.0065 (0.0054, 0.0076)	0.0052 (0.0044, 0.0060)	0.0049 (0.0042, 0.0055)	n/a	0.0062 (0.0052, 0.0072)	0.0093 (0.0073, 0.0113)	0.0057 (0.0050, 0.0065)	0.0068 (0.0056, 0.0079)	0.0099 (0.0083, 0.0115)	0.0062 (0.0055, 0.0068)	0.0076 (0.0060, 0.0091)	0.0073 (0.0063, 0.0084)	0.0071 (0.0060, 0.0082)	0.0055 (0.0049, 0.0061)	0.0069 (0.0060, 0.0077)	0.0049 (0.0042, 0.0055)	0.0053 (0.0047, 0.0060)	n/a	0.0056 (0.0034, 0.0077)	n/a	0.0136 (0.0024, 0.0269)	0.0061 (0.0032, 0.0093)
Noncoding	theta_es2	0.0050 (0.0042, 0.0058)	n/a	n/a	0.0079 (0.0055, 0.0105)	0.0085 (0.0061, 0.0110)	0.0060 (0.0047, 0.0075)	0.0055 (0.0041, 0.0069)	0.0052 (0.0042, 0.0061)	n/a	0.0082 (0.0060, 0.0105)	0.0053 (0.0034, 0.0072)	0.0061 (0.0051, 0.0072)	0.0069 (0.0054, 0.0085)	0.0058 (0.0047, 0.0069)	0.0062 (0.0052, 0.0073)	0.0071 (0.0051, 0.0091)	0.0064 (0.0044, 0.0085)	0.0064 (0.0047, 0.0081)	0.0059 (0.0047, 0.0070)	0.0047 (0.0039, 0.0054)	0.0057 (0.0047, 0.0067)	0.0062 (0.0050, 0.0073)	n/a	0.0211 (0.0039, 0.0422)	n/a	0.0154 (0.0019, 0.0334)	0.0124 (0.0053, 0.0225)
Noncoding	theta_es1	0.0050 (0.0042, 0.0058)	n/a	n/a	0.0079 (0.0055, 0.0105)	0.0085 (0.0061, 0.0110)	0.0060 (0.0047, 0.0075)	0.0055 (0.0041, 0.0069)	0.0052 (0.0042, 0.0061)	n/a	0.0082 (0.0060, 0.0105)	0.0053 (0.0034, 0.0072)	0.0061 (0.0051, 0.0072)	0.0069 (0.0054, 0.0085)	0.0058 (0.0047, 0.0069)	0.0062 (0.0052, 0.0073)	0.0071 (0.0051, 0.0091)	0.0064 (0.0044, 0.0085)	0.0064 (0.0047, 0.0081)	0.0059 (0.0047, 0.0070)	0.0047 (0.0039, 0.0054)	0.0057 (0.0047, 0.0067)	0.0062 (0.0050, 0.0073)	n/a	0.0063 (0.0041, 0.0086)	n/a	0.0146 (0.0023, 0.0299)	0.0111 (0.0069, 0.0157)
Noncoding	theta_Aoe	0.0049 (0.0045, 0.0052)	n/a	n/a	0.0056 (0.0048, 0.0065)	0.0063 (0.0054, 0.0073)	0.0057 (0.0050, 0.0064)	0.0053 (0.0047, 0.0058)	0.0048 (0.0044, 0.0053)	n/a	0.0049 (0.0043, 0.0056)	0.0064 (0.0055, 0.0073)	0.0055 (0.0051, 0.0060)	0.0055 (0.0049, 0.0062)	0.0048 (0.0044, 0.0053)	0.0052 (0.0048, 0.0056)	0.0055 (0.0047, 0.0063)	0.0056 (0.0049, 0.0063)	0.0051 (0.0045, 0.0057)	0.0050 (0.0046, 0.0054)	0.0054 (0.0051, 0.0058)	0.0047 (0.0042, 0.0051)	0.0053 (0.0048, 0.0058)	n/a	n/a	n/a	n/a	n/a
Noncoding	theta_Num	0.0117 (0.0101, 0.0133)	n/a	n/a	0.0208 (0.0152, 0.0270)	0.0110 (0.0085, 0.0136)	0.0002 (0.0001, 0.0003)	0.0112 (0.0093, 0.0132)	0.0059 (0.0052, 0.0067)	n/a	0.0141 (0.0113, 0.0171)	0.0048 (0.0038, 0.0058)	0.0073 (0.0065, 0.0081)	0.0001 (0.0001, 0.0002)	0.0016 (0.0013, 0.0018)	0.0075 (0.0067, 0.0084)	0.0001 (0.0001, 0.0002)	0.0144 (0.0114, 0.0176)	0.0143 (0.0112, 0.0175)	0.0062 (0.0055, 0.0069)	0.0038 (0.0034, 0.0041)	0.0056 (0.0049, 0.0062)	0.0125 (0.0107, 0.0144)	n/a	n/a	n/a	n/a	n/a
Noncoding	theta_Mel	0.0040 (0.0036, 0.0044)	n/a	n/a	0.0145 (0.0113, 0.0180)	0.0074 (0.0060, 0.0089)	0.0093 (0.0078, 0.0109)	0.0002 (0.0001, 0.0002)	0.0048 (0.0042, 0.0053)	n/a	0.0074 (0.0063, 0.0086)	0.0009 (0.0007, 0.0011)	0.0002 (0.0001, 0.0002)	0.0048 (0.0041, 0.0056)	0.0014 (0.0012, 0.0017)	0.0074 (0.0066, 0.0082)	0.0043 (0.0035, 0.0050)	0.0055 (0.0046, 0.0064)	0.0015 (0.0012, 0.0017)	0.0077 (0.0068, 0.0086)	0.0001 (0.0001, 0.0002)	0.0049 (0.0044, 0.0054)	0.0050 (0.0044, 0.0056)	n/a	n/a	n/a	n/a	n/a
Noncoding	theta_Bur	0.0051 (0.0047, 0.0055)	n/a	n/a	0.0101 (0.0088, 0.0114)	0.0102 (0.0088, 0.0115)	0.0060 (0.0053, 0.0068)	0.0074 (0.0067, 0.0081)	0.0056 (0.0051, 0.0061)	n/a	0.0071 (0.0063, 0.0080)	0.0082 (0.0072, 0.0093)	0.0064 (0.0059, 0.0069)	0.0071 (0.0063, 0.0079)	0.0063 (0.0057, 0.0069)	0.0058 (0.0054, 0.0063)	0.0068 (0.0059, 0.0077)	0.0089 (0.0079, 0.0100)	0.0073 (0.0065, 0.0081)	0.0064 (0.0059, 0.0069)	0.0063 (0.0059, 0.0067)	0.0065 (0.0060, 0.0070)	0.0050 (0.0046, 0.0055)	n/a	n/a	n/a	n/a	n/a
Noncoding	theta_Dor	0.0021 (0.0019, 0.0023)	n/a	n/a	0.0033 (0.0027, 0.0038)	0.0041 (0.0035, 0.0048)	0.0024 (0.0020, 0.0027)	0.0027 (0.0024, 0.0030)	0.0022 (0.0020, 0.0025)	n/a	0.0028 (0.0024, 0.0032)	0.0028 (0.0024, 0.0033)	0.0025 (0.0023, 0.0028)	0.0029 (0.0025, 0.0034)	0.0025 (0.0022, 0.0027)	0.0026 (0.0024, 0.0029)	0.0027 (0.0022, 0.0032)	0.0034 (0.0029, 0.0039)	0.0026 (0.0023, 0.0030)	0.0027 (0.0024, 0.0030)	0.0027 (0.0025, 0.0029)	0.0027 (0.0024, 0.0029)	0.0023 (0.0020, 0.0025)	n/a	n/a	n/a	n/a	n/a
Noncoding	theta_Era	0.0051 (0.0047, 0.0056)	n/a	n/a	0.0008 (0.0005, 0.0011)	0.0072 (0.0060, 0.0084)	0.0084 (0.0072, 0.0095)	0.0023 (0.0019, 0.0026)	0.0076 (0.0068, 0.0084)	n/a	0.0004 (0.0003, 0.0006)	0.0057 (0.0048, 0.0067)	0.0061 (0.0055, 0.0067)	0.0081 (0.0070, 0.0091)	0.0079 (0.0071, 0.0087)	0.0001 (0.0000, 0.0001)	0.0095 (0.0080, 0.0110)	0.0031 (0.0026, 0.0036)	0.0002 (0.0001, 0.0003)	0.0002 (0.0001, 0.0002)	0.0081 (0.0075, 0.0088)	0.0055 (0.0049, 0.0060)	0.0074 (0.0066, 0.0082)	n/a	n/a	n/a	n/a	n/a
Noncoding	theta_Sar	0.0037 (0.0034, 0.0040)	n/a	n/a	0.0049 (0.0042, 0.0057)	0.0052 (0.0044, 0.0061)	0.0048 (0.0042, 0.0055)	0.0045 (0.0040, 0.0050)	0.0041 (0.0037, 0.0045)	n/a	0.0045 (0.0039, 0.0051)	0.0057 (0.0049, 0.0066)	0.0039 (0.0035, 0.0042)	0.0041 (0.0035, 0.0046)	0.0040 (0.0036, 0.0045)	0.0047 (0.0043, 0.0051)	0.0039 (0.0033, 0.0046)	0.0046 (0.0039, 0.0052)	0.0043 (0.0037, 0.0048)	0.0043 (0.0039, 0.0046)	0.0044 (0.0041, 0.0048)	0.0036 (0.0033, 0.0040)	0.0043 (0.0038, 0.0047)	n/a	n/a	n/a	n/a	n/a
Noncoding	theta_Tal	0.0045 (0.0041, 0.0049)	n/a	n/a	0.0069 (0.0060, 0.0079)	0.0113 (0.0099, 0.0128)	0.0041 (0.0036, 0.0047)	0.0052 (0.0046, 0.0058)	0.0055 (0.0049, 0.0060)	n/a	0.0057 (0.0050, 0.0065)	0.0054 (0.0046, 0.0063)	0.0065 (0.0060, 0.0071)	0.0055 (0.0048, 0.0062)	0.0067 (0.0060, 0.0073)	0.0074 (0.0069, 0.0080)	0.0071 (0.0061, 0.0081)	0.0097 (0.0086, 0.0109)	0.0091 (0.0081, 0.0100)	0.0055 (0.0050, 0.0060)	0.0059 (0.0055, 0.0063)	0.0058 (0.0053, 0.0063)	0.0040 (0.0036, 0.0044)	n/a	n/a	n/a	n/a	n/a
Noncoding	theta_r	0.0149 (0.0134, 0.0164)	n/a	n/a	0.0117 (0.0091, 0.0143)	0.0162 (0.0131, 0.0192)	0.0123 (0.0104, 0.0141)	0.0154 (0.0134, 0.0175)	0.0160 (0.0141, 0.0179)	n/a	0.0129 (0.0109, 0.0149)	0.0099 (0.0076, 0.0124)	0.0130 (0.0113, 0.0148)	0.0132 (0.0112, 0.0153)	0.0142 (0.0125, 0.0159)	0.0151 (0.0136, 0.0167)	0.0121 (0.0097, 0.0145)	0.0139 (0.0114, 0.0165)	0.0184 (0.0159, 0.0209)	0.0129 (0.0114, 0.0144)	0.0135 (0.0121, 0.0148)	0.0176 (0.0156, 0.0196)	0.0146 (0.0130, 0.0163)	n/a	0.0163 (0.0131, 0.0195)	n/a	0.0172 (0.0043, 0.0314)	0.0178 (0.0132, 0.0226)

## Sheet: 10-j-etales-8spp-scenario2
Table 10. Posterior means and 95% HPD intervals (in parentheses) of parameters from the BPP MSC-I model in Figure 1E (scenario 2) using noncoding and coding loci for each chromosomal region. Multiple posterior peaks, if present, are reported, e.g. there are two peaks, denoted chr1 and chr1-alt, from the coding loci in chromosome 1. Plots of these estimates with 95% HPD intervals are in Figure 1—f…
region	variable	chr1	chr2c	chr3	chr4	chr4-alt	chr5	chr6a	chr7	chr8	chr9	chr10	chr11	chr12	chr12-alt	chr13a	chr14	chr14-alt	chr15	chr15-alt	chr16	chr17	chr18	chr18-alt	chr19	chr20	chr21a	chr21a-alt	chr21b	chr21c
Coding	phi_a1<-nmbd2	0.6637 (0.6313, 0.6949)	0.7741 (0.7173, 0.8300)	0.8097 (0.7621, 0.8568)	0.8036 (0.7532, 0.8518)	0.3874 (0.3026, 0.4750)	0.7725 (0.7208, 0.8237)	0.7880 (0.7409, 0.8342)	0.7051 (0.6688, 0.7407)	0.8269 (0.7812, 0.8711)	0.7951 (0.7373, 0.8512)	0.7410 (0.7114, 0.7709)	0.7750 (0.7392, 0.8114)	0.7764 (0.7432, 0.8089)	0.7570 (0.7236, 0.7918)	0.7051 (0.6699, 0.7392)	0.8591 (0.8159, 0.9022)	0.4813 (0.3874, 0.5759)	0.8894 (0.8529, 0.9247)	0.8754 (0.8343, 0.9164)	0.7967 (0.7424, 0.8498)	0.7660 (0.7291, 0.8025)	0.7832 (0.7487, 0.8174)	0.7591 (0.7189, 0.7997)	0.7656 (0.7300, 0.8017)	0.6828 (0.6478, 0.7180)	0.6432 (0.5929, 0.6949)	0.6164 (0.5632, 0.6700)	0.5465 (0.3453, 0.7488)	0.5920 (0.4864, 0.6915)
Coding	phi_nmbd2<-a1	0.0164 (0.0050, 0.0274)	0.0162 (0.0004, 0.0316)	0.0113 (0.0000, 0.0251)	0.0129 (0.0000, 0.0275)	0.3291 (0.2828, 0.3746)	0.0142 (0.0000, 0.0292)	0.0109 (0.0000, 0.0244)	0.0221 (0.0089, 0.0356)	0.0146 (0.0000, 0.0308)	0.0129 (0.0000, 0.0288)	0.0307 (0.0193, 0.0427)	0.0188 (0.0040, 0.0331)	0.0224 (0.0093, 0.0357)	0.0279 (0.0148, 0.0414)	0.0185 (0.0054, 0.0319)	0.0197 (0.0024, 0.0372)	0.5903 (0.5275, 0.6485)	0.0170 (0.0029, 0.0321)	0.0258 (0.0110, 0.0428)	0.0156 (0.0000, 0.0330)	0.0211 (0.0067, 0.0355)	0.0199 (0.0062, 0.0336)	0.0269 (0.0140, 0.0411)	0.0314 (0.0176, 0.0452)	0.0157 (0.0046, 0.0270)	0.0327 (0.0098, 0.0554)	0.0465 (0.0243, 0.0712)	0.1545 (0.0165, 0.2893)	0.0859 (0.0419, 0.1327)
Coding	tau_a2	0.0267 (0.0261, 0.0272)	0.0299 (0.0284, 0.0315)	0.0286 (0.0273, 0.0299)	0.0293 (0.0280, 0.0306)	0.0220 (0.0214, 0.0225)	0.0283 (0.0272, 0.0294)	0.0276 (0.0266, 0.0286)	0.0280 (0.0273, 0.0288)	0.0289 (0.0278, 0.0299)	0.0299 (0.0284, 0.0313)	0.0276 (0.0269, 0.0283)	0.0279 (0.0271, 0.0287)	0.0282 (0.0274, 0.0291)	0.0274 (0.0267, 0.0282)	0.0268 (0.0261, 0.0275)	0.0315 (0.0299, 0.0330)	0.0239 (0.0233, 0.0245)	0.0317 (0.0303, 0.0328)	0.0308 (0.0292, 0.0323)	0.0289 (0.0277, 0.0300)	0.0274 (0.0265, 0.0282)	0.0289 (0.0278, 0.0299)	0.0278 (0.0265, 0.0292)	0.0267 (0.0258, 0.0276)	0.0276 (0.0268, 0.0284)	0.0287 (0.0277, 0.0297)	0.0279 (0.0269, 0.0289)	0.0274 (0.0249, 0.0300)	0.0273 (0.0252, 0.0293)
Coding	tau_nmbdes	0.0185 (0.0183, 0.0187)	0.0211 (0.0206, 0.0215)	0.0191 (0.0186, 0.0195)	0.0204 (0.0199, 0.0208)	0.0184 (0.0175, 0.0192)	0.0205 (0.0201, 0.0209)	0.0193 (0.0190, 0.0196)	0.0189 (0.0186, 0.0192)	0.0199 (0.0195, 0.0203)	0.0206 (0.0201, 0.0210)	0.0187 (0.0184, 0.0189)	0.0192 (0.0189, 0.0195)	0.0190 (0.0187, 0.0192)	0.0189 (0.0186, 0.0192)	0.0181 (0.0178, 0.0183)	0.0216 (0.0211, 0.0220)	0.0190 (0.0184, 0.0195)	0.0210 (0.0206, 0.0214)	0.0209 (0.0205, 0.0214)	0.0207 (0.0202, 0.0211)	0.0186 (0.0183, 0.0189)	0.0185 (0.0182, 0.0188)	0.0184 (0.0181, 0.0187)	0.0185 (0.0182, 0.0187)	0.0185 (0.0182, 0.0187)	0.0194 (0.0190, 0.0198)	0.0193 (0.0189, 0.0197)	0.0189 (0.0173, 0.0204)	0.0199 (0.0193, 0.0205)
Coding	tau_nmbd2	0.0152 (0.0149, 0.0155)	0.0167 (0.0160, 0.0173)	0.0158 (0.0152, 0.0163)	0.0158 (0.0152, 0.0164)	0.0170 (0.0162, 0.0177)	0.0165 (0.0160, 0.0170)	0.0163 (0.0158, 0.0168)	0.0157 (0.0153, 0.0160)	0.0167 (0.0162, 0.0172)	0.0175 (0.0168, 0.0180)	0.0155 (0.0152, 0.0158)	0.0160 (0.0156, 0.0164)	0.0158 (0.0155, 0.0161)	0.0158 (0.0154, 0.0161)	0.0148 (0.0144, 0.0152)	0.0174 (0.0169, 0.0180)	0.0187 (0.0182, 0.0193)	0.0169 (0.0164, 0.0174)	0.0169 (0.0164, 0.0174)	0.0170 (0.0165, 0.0176)	0.0158 (0.0155, 0.0162)	0.0156 (0.0152, 0.0159)	0.0156 (0.0152, 0.0159)	0.0152 (0.0148, 0.0155)	0.0159 (0.0155, 0.0162)	0.0175 (0.0170, 0.0180)	0.0173 (0.0168, 0.0178)	0.0176 (0.0158, 0.0193)	0.0169 (0.0162, 0.0176)
Coding	tau_nmbd1	0.0145 (0.0142, 0.0148)	0.0155 (0.0149, 0.0160)	0.0143 (0.0137, 0.0148)	0.0142 (0.0136, 0.0148)	0.0140 (0.0133, 0.0148)	0.0152 (0.0147, 0.0156)	0.0145 (0.0141, 0.0149)	0.0141 (0.0137, 0.0145)	0.0148 (0.0143, 0.0153)	0.0153 (0.0147, 0.0158)	0.0142 (0.0139, 0.0145)	0.0147 (0.0144, 0.0151)	0.0147 (0.0144, 0.0150)	0.0148 (0.0145, 0.0151)	0.0140 (0.0136, 0.0143)	0.0159 (0.0154, 0.0164)	0.0160 (0.0154, 0.0166)	0.0153 (0.0148, 0.0157)	0.0153 (0.0148, 0.0158)	0.0158 (0.0153, 0.0163)	0.0147 (0.0143, 0.0150)	0.0142 (0.0138, 0.0145)	0.0142 (0.0139, 0.0146)	0.0144 (0.0141, 0.0148)	0.0145 (0.0142, 0.0149)	0.0160 (0.0155, 0.0164)	0.0159 (0.0155, 0.0164)	0.0168 (0.0150, 0.0185)	0.0165 (0.0159, 0.0172)
Coding	tau_nmb	0.0133 (0.0128, 0.0138)	0.0147 (0.0141, 0.0153)	0.0134 (0.0128, 0.0140)	0.0138 (0.0132, 0.0143)	0.0136 (0.0130, 0.0143)	0.0145 (0.0140, 0.0150)	0.0141 (0.0136, 0.0146)	0.0136 (0.0132, 0.0140)	0.0140 (0.0134, 0.0145)	0.0146 (0.0140, 0.0152)	0.0136 (0.0131, 0.0140)	0.0142 (0.0138, 0.0147)	0.0144 (0.0141, 0.0148)	0.0144 (0.0141, 0.0148)	0.0134 (0.0130, 0.0138)	0.0155 (0.0149, 0.0160)	0.0156 (0.0150, 0.0162)	0.0144 (0.0139, 0.0149)	0.0144 (0.0139, 0.0150)	0.0153 (0.0147, 0.0159)	0.0141 (0.0137, 0.0146)	0.0137 (0.0133, 0.0141)	0.0138 (0.0133, 0.0142)	0.0134 (0.0128, 0.0139)	0.0138 (0.0133, 0.0142)	0.0139 (0.0131, 0.0147)	0.0139 (0.0131, 0.0146)	0.0144 (0.0121, 0.0164)	0.0145 (0.0135, 0.0155)
Coding	tau_nm	0.0039 (0.0037, 0.0041)	0.0042 (0.0037, 0.0046)	0.0039 (0.0036, 0.0042)	0.0044 (0.0042, 0.0047)	0.0044 (0.0042, 0.0047)	0.0037 (0.0034, 0.0040)	0.0034 (0.0031, 0.0036)	0.0030 (0.0028, 0.0032)	0.0043 (0.0041, 0.0045)	0.0036 (0.0031, 0.0040)	0.0036 (0.0034, 0.0038)	0.0031 (0.0028, 0.0034)	0.0008 (0.0006, 0.0010)	0.0008 (0.0006, 0.0011)	0.0042 (0.0040, 0.0044)	0.0034 (0.0028, 0.0039)	0.0034 (0.0028, 0.0039)	0.0043 (0.0041, 0.0046)	0.0043 (0.0041, 0.0046)	0.0036 (0.0033, 0.0039)	0.0034 (0.0032, 0.0036)	0.0022 (0.0018, 0.0026)	0.0022 (0.0018, 0.0026)	0.0038 (0.0036, 0.0040)	0.0039 (0.0037, 0.0041)	0.0058 (0.0054, 0.0062)	0.0058 (0.0054, 0.0062)	0.0072 (0.0054, 0.0088)	0.0055 (0.0048, 0.0061)
Coding	tau_es	0.0099 (0.0097, 0.0102)	0.0106 (0.0100, 0.0111)	0.0097 (0.0091, 0.0102)	0.0102 (0.0097, 0.0107)	0.0106 (0.0100, 0.0111)	0.0103 (0.0099, 0.0108)	0.0101 (0.0096, 0.0105)	0.0099 (0.0096, 0.0102)	0.0111 (0.0106, 0.0116)	0.0107 (0.0101, 0.0113)	0.0093 (0.0090, 0.0096)	0.0098 (0.0095, 0.0102)	0.0099 (0.0096, 0.0102)	0.0099 (0.0096, 0.0102)	0.0093 (0.0090, 0.0097)	0.0112 (0.0107, 0.0116)	0.0114 (0.0110, 0.0119)	0.0107 (0.0102, 0.0112)	0.0107 (0.0102, 0.0112)	0.0106 (0.0101, 0.0110)	0.0097 (0.0094, 0.0100)	0.0092 (0.0088, 0.0095)	0.0092 (0.0088, 0.0095)	0.0099 (0.0096, 0.0102)	0.0094 (0.0091, 0.0096)	0.0095 (0.0090, 0.0100)	0.0095 (0.0090, 0.0100)	0.0083 (0.0061, 0.0105)	0.0092 (0.0083, 0.0101)
Coding	tau_a1	0.0152 (0.0149, 0.0155)	0.0167 (0.0160, 0.0173)	0.0158 (0.0152, 0.0163)	0.0158 (0.0152, 0.0164)	0.0170 (0.0162, 0.0177)	0.0165 (0.0160, 0.0170)	0.0163 (0.0158, 0.0168)	0.0157 (0.0153, 0.0160)	0.0167 (0.0162, 0.0172)	0.0175 (0.0168, 0.0180)	0.0155 (0.0152, 0.0158)	0.0160 (0.0156, 0.0164)	0.0158 (0.0155, 0.0161)	0.0158 (0.0154, 0.0161)	0.0148 (0.0144, 0.0152)	0.0174 (0.0169, 0.0180)	0.0187 (0.0182, 0.0193)	0.0169 (0.0164, 0.0174)	0.0169 (0.0164, 0.0174)	0.0170 (0.0165, 0.0176)	0.0158 (0.0155, 0.0162)	0.0156 (0.0152, 0.0159)	0.0156 (0.0152, 0.0159)	0.0152 (0.0148, 0.0155)	0.0159 (0.0155, 0.0162)	0.0175 (0.0170, 0.0180)	0.0173 (0.0168, 0.0178)	0.0176 (0.0158, 0.0193)	0.0169 (0.0162, 0.0176)
Coding	tau_r	0.0320 (0.0316, 0.0324)	0.0343 (0.0335, 0.0352)	0.0310 (0.0303, 0.0318)	0.0327 (0.0320, 0.0335)	0.0329 (0.0322, 0.0336)	0.0335 (0.0328, 0.0342)	0.0327 (0.0321, 0.0334)	0.0329 (0.0324, 0.0335)	0.0329 (0.0323, 0.0336)	0.0329 (0.0321, 0.0337)	0.0319 (0.0314, 0.0324)	0.0320 (0.0315, 0.0325)	0.0325 (0.0320, 0.0331)	0.0327 (0.0321, 0.0332)	0.0314 (0.0309, 0.0319)	0.0339 (0.0332, 0.0346)	0.0346 (0.0339, 0.0353)	0.0333 (0.0326, 0.0340)	0.0335 (0.0327, 0.0342)	0.0345 (0.0338, 0.0352)	0.0319 (0.0313, 0.0324)	0.0303 (0.0298, 0.0309)	0.0305 (0.0299, 0.0311)	0.0343 (0.0337, 0.0349)	0.0318 (0.0314, 0.0323)	0.0340 (0.0333, 0.0348)	0.0341 (0.0334, 0.0349)	0.0327 (0.0300, 0.0354)	0.0329 (0.0317, 0.0340)
Coding	theta_a2	0.0041 (0.0034, 0.0048)	0.0050 (0.0029, 0.0070)	0.0026 (0.0008, 0.0043)	0.0037 (0.0020, 0.0055)	0.0113 (0.0101, 0.0125)	0.0044 (0.0031, 0.0057)	0.0046 (0.0035, 0.0058)	0.0039 (0.0029, 0.0048)	0.0032 (0.0020, 0.0045)	0.0024 (0.0008, 0.0042)	0.0034 (0.0026, 0.0042)	0.0036 (0.0026, 0.0046)	0.0033 (0.0023, 0.0042)	0.0041 (0.0032, 0.0050)	0.0039 (0.0031, 0.0048)	0.0022 (0.0006, 0.0041)	0.0101 (0.0089, 0.0111)	0.0014 (0.0002, 0.0030)	0.0023 (0.0006, 0.0043)	0.0053 (0.0039, 0.0067)	0.0036 (0.0026, 0.0046)	0.0013 (0.0002, 0.0026)	0.0027 (0.0007, 0.0042)	0.0050 (0.0042, 0.0059)	0.0035 (0.0025, 0.0045)	0.0051 (0.0038, 0.0065)	0.0059 (0.0045, 0.0073)	0.0063 (0.0021, 0.0108)	0.0053 (0.0027, 0.0081)
Coding	theta_nmbdes	0.0108 (0.0100, 0.0116)	0.0141 (0.0123, 0.0159)	0.0141 (0.0124, 0.0158)	0.0137 (0.0120, 0.0155)	0.0466 (0.0306, 0.0641)	0.0134 (0.0118, 0.0151)	0.0144 (0.0129, 0.0159)	0.0119 (0.0108, 0.0130)	0.0157 (0.0139, 0.0175)	0.0129 (0.0112, 0.0146)	0.0110 (0.0101, 0.0118)	0.0134 (0.0121, 0.0147)	0.0125 (0.0115, 0.0136)	0.0127 (0.0116, 0.0137)	0.0120 (0.0110, 0.0131)	0.0138 (0.0121, 0.0156)	0.0329 (0.0222, 0.0449)	0.0140 (0.0125, 0.0155)	0.0139 (0.0123, 0.0155)	0.0148 (0.0129, 0.0168)	0.0127 (0.0115, 0.0139)	0.0111 (0.0101, 0.0121)	0.0111 (0.0101, 0.0122)	0.0116 (0.0105, 0.0126)	0.0113 (0.0104, 0.0121)	0.0106 (0.0093, 0.0120)	0.0103 (0.0090, 0.0117)	0.0121 (0.0058, 0.0196)	0.0085 (0.0066, 0.0105)
Coding	theta_nmbd2	0.0195 (0.0172, 0.0218)	0.0270 (0.0226, 0.0315)	0.0257 (0.0215, 0.0300)	0.0292 (0.0248, 0.0338)	0.0062 (0.0058, 0.0067)	0.0237 (0.0204, 0.0270)	0.0242 (0.0208, 0.0277)	0.0260 (0.0226, 0.0295)	0.0283 (0.0240, 0.0326)	0.0251 (0.0210, 0.0293)	0.0210 (0.0187, 0.0234)	0.0248 (0.0218, 0.0280)	0.0233 (0.0205, 0.0262)	0.0223 (0.0197, 0.0251)	0.0259 (0.0222, 0.0298)	0.0280 (0.0240, 0.0321)	0.0310 (0.0218, 0.0411)	0.0298 (0.0257, 0.0341)	0.0286 (0.0246, 0.0327)	0.0239 (0.0199, 0.0278)	0.0233 (0.0202, 0.0266)	0.0210 (0.0182, 0.0237)	0.0201 (0.0173, 0.0227)	0.0227 (0.0195, 0.0260)	0.0205 (0.0179, 0.0232)	0.0135 (0.0109, 0.0162)	0.0129 (0.0105, 0.0155)	0.0236 (0.0083, 0.0416)	0.0107 (0.0074, 0.0142)
Coding	theta_nmbd1	0.0195 (0.0172, 0.0218)	0.0270 (0.0226, 0.0315)	0.0257 (0.0215, 0.0300)	0.0292 (0.0248, 0.0338)	0.0543 (0.0361, 0.0749)	0.0237 (0.0204, 0.0270)	0.0242 (0.0208, 0.0277)	0.0260 (0.0226, 0.0295)	0.0283 (0.0240, 0.0326)	0.0251 (0.0210, 0.0293)	0.0210 (0.0187, 0.0234)	0.0248 (0.0218, 0.0280)	0.0233 (0.0205, 0.0262)	0.0223 (0.0197, 0.0251)	0.0259 (0.0222, 0.0298)	0.0280 (0.0240, 0.0321)	0.0310 (0.0218, 0.0411)	0.0298 (0.0257, 0.0341)	0.0286 (0.0246, 0.0327)	0.0239 (0.0199, 0.0278)	0.0233 (0.0202, 0.0266)	0.0210 (0.0182, 0.0237)	0.0201 (0.0173, 0.0227)	0.0227 (0.0195, 0.0260)	0.0205 (0.0179, 0.0232)	0.0135 (0.0109, 0.0162)	0.0129 (0.0105, 0.0155)	0.0236 (0.0083, 0.0416)	0.0107 (0.0074, 0.0142)
Coding	theta_nmb	0.0188 (0.0097, 0.0279)	0.0160 (0.0051, 0.0285)	0.0212 (0.0074, 0.0364)	0.0174 (0.0045, 0.0328)	0.0156 (0.0038, 0.0301)	0.0141 (0.0042, 0.0250)	0.0201 (0.0051, 0.0368)	0.0156 (0.0048, 0.0277)	0.0207 (0.0074, 0.0351)	0.0172 (0.0046, 0.0315)	0.0184 (0.0063, 0.0311)	0.0092 (0.0028, 0.0165)	0.0050 (0.0014, 0.0092)	0.0053 (0.0014, 0.0096)	0.0204 (0.0063, 0.0356)	0.0140 (0.0033, 0.0263)	0.0140 (0.0033, 0.0267)	0.0138 (0.0046, 0.0231)	0.0145 (0.0054, 0.0239)	0.0200 (0.0053, 0.0374)	0.0111 (0.0035, 0.0196)	0.0136 (0.0038, 0.0245)	0.0139 (0.0039, 0.0249)	0.0247 (0.0110, 0.0390)	0.0184 (0.0069, 0.0311)	0.0145 (0.0074, 0.0221)	0.0147 (0.0073, 0.0221)	0.0194 (0.0044, 0.0370)	0.0095 (0.0039, 0.0156)
Coding	theta_nm	0.0068 (0.0063, 0.0072)	0.0098 (0.0088, 0.0110)	0.0078 (0.0071, 0.0085)	0.0073 (0.0066, 0.0080)	0.0073 (0.0066, 0.0079)	0.0089 (0.0081, 0.0097)	0.0091 (0.0083, 0.0098)	0.0100 (0.0094, 0.0107)	0.0080 (0.0074, 0.0086)	0.0096 (0.0083, 0.0108)	0.0080 (0.0075, 0.0086)	0.0093 (0.0086, 0.0100)	0.0149 (0.0141, 0.0157)	0.0149 (0.0141, 0.0157)	0.0072 (0.0067, 0.0077)	0.0110 (0.0096, 0.0123)	0.0110 (0.0096, 0.0123)	0.0087 (0.0080, 0.0094)	0.0087 (0.0080, 0.0094)	0.0085 (0.0077, 0.0093)	0.0082 (0.0077, 0.0088)	0.0102 (0.0092, 0.0112)	0.0103 (0.0093, 0.0112)	0.0081 (0.0076, 0.0087)	0.0067 (0.0063, 0.0071)	0.0053 (0.0045, 0.0062)	0.0053 (0.0045, 0.0061)	0.0053 (0.0020, 0.0090)	0.0061 (0.0047, 0.0075)
Coding	theta_es	0.0065 (0.0059, 0.0071)	0.0105 (0.0092, 0.0119)	0.0081 (0.0070, 0.0093)	0.0079 (0.0069, 0.0090)	0.0068 (0.0056, 0.0079)	0.0069 (0.0060, 0.0078)	0.0076 (0.0066, 0.0086)	0.0067 (0.0061, 0.0073)	0.0073 (0.0063, 0.0083)	0.0073 (0.0062, 0.0086)	0.0078 (0.0072, 0.0085)	0.0072 (0.0065, 0.0078)	0.0075 (0.0069, 0.0082)	0.0075 (0.0069, 0.0082)	0.0079 (0.0071, 0.0087)	0.0071 (0.0062, 0.0080)	0.0062 (0.0053, 0.0071)	0.0077 (0.0067, 0.0087)	0.0077 (0.0066, 0.0087)	0.0077 (0.0066, 0.0088)	0.0071 (0.0064, 0.0079)	0.0070 (0.0063, 0.0078)	0.0070 (0.0063, 0.0077)	0.0067 (0.0060, 0.0073)	0.0075 (0.0069, 0.0081)	0.0077 (0.0066, 0.0088)	0.0077 (0.0066, 0.0088)	0.0126 (0.0066, 0.0194)	0.0083 (0.0064, 0.0104)
Coding	theta_a1	0.0056 (0.0053, 0.0058)	0.0071 (0.0065, 0.0077)	0.0055 (0.0051, 0.0060)	0.0061 (0.0056, 0.0066)	0.0543 (0.0361, 0.0749)	0.0062 (0.0058, 0.0067)	0.0063 (0.0059, 0.0067)	0.0061 (0.0058, 0.0064)	0.0061 (0.0056, 0.0065)	0.0064 (0.0059, 0.0069)	0.0060 (0.0057, 0.0062)	0.0057 (0.0054, 0.0060)	0.0057 (0.0054, 0.0060)	0.0057 (0.0054, 0.0060)	0.0060 (0.0057, 0.0063)	0.0066 (0.0061, 0.0071)	0.0067 (0.0062, 0.0071)	0.0062 (0.0057, 0.0066)	0.0062 (0.0057, 0.0066)	0.0056 (0.0052, 0.0061)	0.0053 (0.0050, 0.0056)	0.0054 (0.0051, 0.0057)	0.0055 (0.0051, 0.0058)	0.0060 (0.0057, 0.0064)	0.0055 (0.0053, 0.0058)	0.0344 (0.0124, 0.0585)	0.0354 (0.0150, 0.0569)	0.0325 (0.0099, 0.0578)	0.0363 (0.0162, 0.0596)
Coding	theta_Aoe	0.0056 (0.0053, 0.0058)	0.0071 (0.0065, 0.0077)	0.0055 (0.0051, 0.0060)	0.0061 (0.0056, 0.0066)	0.0062 (0.0058, 0.0067)	0.0062 (0.0058, 0.0067)	0.0063 (0.0059, 0.0067)	0.0061 (0.0058, 0.0064)	0.0061 (0.0056, 0.0065)	0.0064 (0.0059, 0.0069)	0.0060 (0.0057, 0.0062)	0.0057 (0.0054, 0.0060)	0.0057 (0.0054, 0.0060)	0.0057 (0.0054, 0.0060)	0.0060 (0.0057, 0.0063)	0.0066 (0.0061, 0.0071)	0.0067 (0.0062, 0.0071)	0.0062 (0.0057, 0.0066)	0.0062 (0.0057, 0.0066)	0.0056 (0.0052, 0.0061)	0.0053 (0.0050, 0.0056)	0.0054 (0.0051, 0.0057)	0.0055 (0.0051, 0.0058)	0.0060 (0.0057, 0.0064)	0.0055 (0.0053, 0.0058)	n/a	n/a	n/a	n/a
Coding	theta_Num	0.0103 (0.0095, 0.0110)	0.0125 (0.0109, 0.0142)	0.0142 (0.0124, 0.0160)	0.0150 (0.0131, 0.0171)	0.0151 (0.0132, 0.0171)	0.0003 (0.0003, 0.0004)	0.0168 (0.0146, 0.0191)	0.0045 (0.0042, 0.0049)	0.0143 (0.0128, 0.0159)	0.0063 (0.0055, 0.0071)	0.0083 (0.0077, 0.0089)	0.0006 (0.0005, 0.0006)	0.0008 (0.0007, 0.0010)	0.0008 (0.0006, 0.0010)	0.0090 (0.0083, 0.0096)	0.0005 (0.0004, 0.0006)	0.0005 (0.0004, 0.0006)	0.0138 (0.0124, 0.0153)	0.0138 (0.0124, 0.0153)	0.0166 (0.0142, 0.0192)	0.0056 (0.0052, 0.0060)	0.0025 (0.0022, 0.0028)	0.0025 (0.0021, 0.0028)	0.0068 (0.0063, 0.0072)	0.0113 (0.0104, 0.0122)	n/a	n/a	n/a	n/a
Coding	theta_Mel	0.0028 (0.0027, 0.0030)	0.0007 (0.0006, 0.0008)	0.0041 (0.0038, 0.0045)	0.0050 (0.0046, 0.0055)	0.0051 (0.0046, 0.0056)	0.0081 (0.0073, 0.0089)	0.0011 (0.0010, 0.0012)	0.0032 (0.0030, 0.0034)	0.0058 (0.0053, 0.0062)	0.0008 (0.0007, 0.0009)	0.0005 (0.0005, 0.0006)	0.0043 (0.0040, 0.0046)	0.0009 (0.0007, 0.0011)	0.0009 (0.0007, 0.0011)	0.0066 (0.0062, 0.0071)	0.0042 (0.0037, 0.0047)	0.0042 (0.0037, 0.0047)	0.0052 (0.0048, 0.0057)	0.0052 (0.0048, 0.0057)	0.0014 (0.0012, 0.0015)	0.0043 (0.0040, 0.0046)	0.0004 (0.0003, 0.0004)	0.0003 (0.0003, 0.0004)	0.0038 (0.0036, 0.0041)	0.0036 (0.0034, 0.0038)	n/a	n/a	n/a	n/a
Coding	theta_Bur	0.0038 (0.0036, 0.0040)	0.0054 (0.0050, 0.0059)	0.0056 (0.0052, 0.0060)	0.0053 (0.0048, 0.0057)	0.0053 (0.0048, 0.0057)	0.0055 (0.0051, 0.0059)	0.0054 (0.0050, 0.0058)	0.0047 (0.0044, 0.0049)	0.0048 (0.0044, 0.0051)	0.0050 (0.0046, 0.0055)	0.0044 (0.0042, 0.0046)	0.0042 (0.0040, 0.0045)	0.0045 (0.0043, 0.0048)	0.0045 (0.0043, 0.0048)	0.0043 (0.0040, 0.0045)	0.0053 (0.0049, 0.0057)	0.0053 (0.0049, 0.0057)	0.0050 (0.0046, 0.0054)	0.0050 (0.0046, 0.0054)	0.0051 (0.0047, 0.0055)	0.0039 (0.0037, 0.0041)	0.0041 (0.0038, 0.0044)	0.0041 (0.0038, 0.0043)	0.0046 (0.0043, 0.0048)	0.0040 (0.0038, 0.0043)	n/a	n/a	n/a	n/a
Coding	theta_Dor	0.0021 (0.0019, 0.0022)	0.0026 (0.0023, 0.0029)	0.0025 (0.0023, 0.0028)	0.0025 (0.0022, 0.0027)	0.0025 (0.0022, 0.0028)	0.0022 (0.0020, 0.0025)	0.0026 (0.0024, 0.0028)	0.0026 (0.0025, 0.0028)	0.0023 (0.0021, 0.0025)	0.0027 (0.0024, 0.0030)	0.0024 (0.0022, 0.0025)	0.0024 (0.0023, 0.0026)	0.0028 (0.0026, 0.0030)	0.0028 (0.0026, 0.0030)	0.0024 (0.0022, 0.0026)	0.0024 (0.0022, 0.0027)	0.0024 (0.0022, 0.0027)	0.0028 (0.0026, 0.0031)	0.0029 (0.0026, 0.0031)	0.0024 (0.0022, 0.0027)	0.0023 (0.0022, 0.0025)	0.0027 (0.0025, 0.0028)	0.0027 (0.0025, 0.0028)	0.0025 (0.0023, 0.0026)	0.0022 (0.0020, 0.0023)	n/a	n/a	n/a	n/a
Coding	theta_Era	0.0064 (0.0061, 0.0067)	0.0127 (0.0115, 0.0138)	0.0001 (0.0000, 0.0001)	0.0097 (0.0089, 0.0105)	0.0098 (0.0089, 0.0106)	0.0093 (0.0085, 0.0100)	0.0029 (0.0027, 0.0032)	0.0107 (0.0100, 0.0113)	0.0004 (0.0003, 0.0005)	0.0042 (0.0038, 0.0046)	0.0068 (0.0064, 0.0071)	0.0118 (0.0111, 0.0124)	0.0104 (0.0098, 0.0110)	0.0104 (0.0098, 0.0109)	0.0001 (0.0000, 0.0001)	0.0147 (0.0135, 0.0158)	0.0147 (0.0135, 0.0158)	0.0035 (0.0032, 0.0038)	0.0035 (0.0032, 0.0038)	0.0002 (0.0001, 0.0002)	0.0002 (0.0002, 0.0002)	0.0080 (0.0075, 0.0085)	0.0080 (0.0075, 0.0085)	0.0072 (0.0068, 0.0076)	0.0086 (0.0082, 0.0091)	n/a	n/a	n/a	n/a
Coding	theta_Sar	0.0040 (0.0038, 0.0042)	0.0047 (0.0043, 0.0051)	0.0048 (0.0044, 0.0052)	0.0047 (0.0043, 0.0051)	0.0047 (0.0043, 0.0051)	0.0047 (0.0043, 0.0050)	0.0045 (0.0042, 0.0048)	0.0040 (0.0038, 0.0043)	0.0046 (0.0043, 0.0049)	0.0050 (0.0046, 0.0055)	0.0039 (0.0037, 0.0041)	0.0042 (0.0039, 0.0044)	0.0041 (0.0039, 0.0043)	0.0041 (0.0039, 0.0043)	0.0041 (0.0038, 0.0043)	0.0050 (0.0047, 0.0054)	0.0051 (0.0047, 0.0054)	0.0048 (0.0044, 0.0051)	0.0048 (0.0044, 0.0051)	0.0046 (0.0042, 0.0050)	0.0040 (0.0037, 0.0042)	0.0037 (0.0035, 0.0039)	0.0037 (0.0035, 0.0039)	0.0038 (0.0035, 0.0040)	0.0037 (0.0035, 0.0039)	n/a	n/a	n/a	n/a
Coding	theta_Tal	0.0055 (0.0052, 0.0057)	0.0063 (0.0057, 0.0068)	0.0063 (0.0058, 0.0067)	0.0067 (0.0062, 0.0073)	0.0067 (0.0062, 0.0072)	0.0058 (0.0053, 0.0062)	0.0067 (0.0063, 0.0071)	0.0064 (0.0060, 0.0067)	0.0052 (0.0049, 0.0056)	0.0057 (0.0052, 0.0062)	0.0059 (0.0057, 0.0062)	0.0053 (0.0050, 0.0056)	0.0068 (0.0064, 0.0071)	0.0068 (0.0064, 0.0071)	0.0065 (0.0062, 0.0069)	0.0062 (0.0058, 0.0067)	0.0062 (0.0058, 0.0067)	0.0080 (0.0075, 0.0086)	0.0080 (0.0075, 0.0086)	0.0069 (0.0063, 0.0074)	0.0057 (0.0054, 0.0060)	0.0062 (0.0058, 0.0065)	0.0062 (0.0058, 0.0065)	0.0060 (0.0057, 0.0063)	0.0052 (0.0049, 0.0055)	n/a	n/a	n/a	n/a
Coding	theta_r	0.0157 (0.0147, 0.0167)	0.0150 (0.0133, 0.0168)	0.0172 (0.0155, 0.0189)	0.0149 (0.0133, 0.0164)	0.0140 (0.0126, 0.0154)	0.0154 (0.0140, 0.0169)	0.0165 (0.0151, 0.0179)	0.0191 (0.0178, 0.0204)	0.0157 (0.0142, 0.0171)	0.0166 (0.0148, 0.0184)	0.0176 (0.0165, 0.0187)	0.0135 (0.0125, 0.0146)	0.0170 (0.0159, 0.0182)	0.0168 (0.0156, 0.0179)	0.0174 (0.0162, 0.0185)	0.0169 (0.0152, 0.0184)	0.0152 (0.0139, 0.0166)	0.0174 (0.0158, 0.0190)	0.0171 (0.0155, 0.0188)	0.0164 (0.0148, 0.0180)	0.0167 (0.0155, 0.0178)	0.0190 (0.0176, 0.0203)	0.0185 (0.0171, 0.0200)	0.0175 (0.0162, 0.0188)	0.0162 (0.0152, 0.0173)	0.0146 (0.0130, 0.0162)	0.0144 (0.0128, 0.0159)	0.0192 (0.0129, 0.0255)	0.0182 (0.0156, 0.0209)
Noncoding	phi_a1<-nmbd2	0.7375 (0.6848, 0.7897)	n/a	0.7843 (0.6337, 0.9201)	0.6913 (0.5663, 0.8130)	n/a	0.7762 (0.6681, 0.8821)	0.7379 (0.6618, 0.8148)	0.7434 (0.6811, 0.8045)	0.7065 (0.6211, 0.7888)	0.7751 (0.6048, 0.9339)	0.7067 (0.6389, 0.7708)	0.7552 (0.6619, 0.8481)	0.7291 (0.6526, 0.8023)	n/a	0.7531 (0.6950, 0.8084)	0.8704 (0.7579, 0.9960)	n/a	0.7760 (0.6733, 0.8748)	n/a	0.8035 (0.7230, 0.8816)	0.7481 (0.6847, 0.8088)	0.7818 (0.7322, 0.8314)	n/a	0.7662 (0.7100, 0.8215)	0.7526 (0.6813, 0.8237)	0.6918 (0.5321, 0.8470)	n/a	0.4873 (0.0002, 0.9342)	0.6899 (0.4945, 0.8813)
Noncoding	phi_nmbd2<-a1	0.0437 (0.0190, 0.0680)	n/a	0.0589 (0.0001, 0.1159)	0.0300 (0.0000, 0.0714)	n/a	0.0575 (0.0047, 0.1094)	0.0420 (0.0128, 0.0725)	0.0498 (0.0234, 0.0773)	0.0444 (0.0106, 0.0800)	0.0345 (0.0000, 0.0849)	0.0318 (0.0000, 0.0602)	0.0466 (0.0009, 0.0885)	0.0462 (0.0101, 0.0821)	n/a	0.0605 (0.0326, 0.0887)	0.0370 (0.0000, 0.0866)	n/a	0.0291 (0.0000, 0.0639)	n/a	0.0518 (0.0119, 0.0922)	0.0316 (0.0056, 0.0567)	0.0438 (0.0214, 0.0670)	n/a	0.0305 (0.0052, 0.0550)	0.0355 (0.0060, 0.0654)	0.0673 (0.0115, 0.1317)	n/a	0.2078 (0.0000, 0.4593)	0.1079 (0.0171, 0.2001)
Noncoding	tau_a2	0.0212 (0.0205, 0.0218)	n/a	0.0230 (0.0211, 0.0248)	0.0234 (0.0220, 0.0248)	n/a	0.0223 (0.0213, 0.0234)	0.0220 (0.0209, 0.0230)	0.0219 (0.0210, 0.0228)	0.0228 (0.0219, 0.0237)	0.0224 (0.0204, 0.0243)	0.0231 (0.0220, 0.0241)	0.0226 (0.0215, 0.0237)	0.0220 (0.0211, 0.0229)	n/a	0.0227 (0.0219, 0.0235)	0.0229 (0.0215, 0.0242)	n/a	0.0234 (0.0222, 0.0246)	n/a	0.0231 (0.0221, 0.0241)	0.0217 (0.0208, 0.0225)	0.0221 (0.0214, 0.0228)	n/a	0.0215 (0.0205, 0.0225)	0.0216 (0.0208, 0.0223)	0.0229 (0.0213, 0.0246)	n/a	0.0309 (0.0233, 0.0394)	0.0220 (0.0199, 0.0242)
Noncoding	tau_nmbdes	0.0160 (0.0157, 0.0163)	n/a	0.0190 (0.0182, 0.0198)	0.0187 (0.0179, 0.0194)	n/a	0.0177 (0.0171, 0.0183)	0.0167 (0.0163, 0.0172)	0.0162 (0.0158, 0.0165)	0.0183 (0.0177, 0.0189)	0.0178 (0.0169, 0.0185)	0.0171 (0.0167, 0.0175)	0.0178 (0.0172, 0.0183)	0.0168 (0.0164, 0.0172)	n/a	0.0171 (0.0168, 0.0175)	0.0178 (0.0171, 0.0185)	n/a	0.0185 (0.0178, 0.0191)	n/a	0.0174 (0.0168, 0.0179)	0.0166 (0.0163, 0.0170)	0.0169 (0.0166, 0.0172)	n/a	0.0154 (0.0150, 0.0157)	0.0167 (0.0163, 0.0171)	0.0180 (0.0172, 0.0188)	n/a	0.0262 (0.0206, 0.0317)	0.0172 (0.0161, 0.0183)
Noncoding	tau_nmbd2	0.0144 (0.0141, 0.0147)	n/a	0.0169 (0.0161, 0.0177)	0.0169 (0.0161, 0.0177)	n/a	0.0159 (0.0152, 0.0165)	0.0145 (0.0140, 0.0151)	0.0146 (0.0141, 0.0150)	0.0152 (0.0145, 0.0158)	0.0158 (0.0148, 0.0168)	0.0158 (0.0154, 0.0163)	0.0160 (0.0154, 0.0166)	0.0154 (0.0149, 0.0158)	n/a	0.0156 (0.0152, 0.0160)	0.0164 (0.0155, 0.0172)	n/a	0.0160 (0.0153, 0.0168)	n/a	0.0157 (0.0151, 0.0163)	0.0147 (0.0143, 0.0151)	0.0149 (0.0145, 0.0152)	n/a	0.0139 (0.0134, 0.0143)	0.0151 (0.0146, 0.0155)	0.0170 (0.0160, 0.0179)	n/a	0.0244 (0.0185, 0.0303)	0.0155 (0.0143, 0.0167)
Noncoding	tau_nmbd1	0.0139 (0.0135, 0.0142)	n/a	0.0163 (0.0155, 0.0171)	0.0166 (0.0157, 0.0173)	n/a	0.0151 (0.0145, 0.0158)	0.0141 (0.0135, 0.0147)	0.0139 (0.0135, 0.0144)	0.0148 (0.0142, 0.0155)	0.0148 (0.0140, 0.0157)	0.0147 (0.0142, 0.0151)	0.0151 (0.0144, 0.0157)	0.0149 (0.0144, 0.0153)	n/a	0.0150 (0.0146, 0.0155)	0.0147 (0.0138, 0.0156)	n/a	0.0151 (0.0144, 0.0158)	n/a	0.0151 (0.0145, 0.0157)	0.0142 (0.0138, 0.0146)	0.0142 (0.0138, 0.0145)	n/a	0.0134 (0.0130, 0.0139)	0.0145 (0.0140, 0.0149)	0.0158 (0.0149, 0.0166)	n/a	0.0227 (0.0168, 0.0286)	0.0149 (0.0137, 0.0160)
Noncoding	tau_nmb	0.0120 (0.0112, 0.0128)	n/a	0.0152 (0.0142, 0.0162)	0.0160 (0.0150, 0.0170)	n/a	0.0127 (0.0116, 0.0138)	0.0128 (0.0117, 0.0138)	0.0127 (0.0118, 0.0135)	0.0132 (0.0121, 0.0142)	0.0138 (0.0128, 0.0148)	0.0134 (0.0126, 0.0142)	0.0139 (0.0129, 0.0149)	0.0137 (0.0130, 0.0144)	n/a	0.0136 (0.0128, 0.0143)	0.0140 (0.0129, 0.0150)	n/a	0.0146 (0.0137, 0.0155)	n/a	0.0140 (0.0131, 0.0148)	0.0124 (0.0115, 0.0133)	0.0130 (0.0123, 0.0136)	n/a	0.0118 (0.0110, 0.0125)	0.0128 (0.0119, 0.0137)	0.0137 (0.0122, 0.0151)	n/a	0.0202 (0.0134, 0.0268)	0.0129 (0.0111, 0.0145)
Noncoding	tau_nm	0.0035 (0.0032, 0.0037)	n/a	0.0042 (0.0037, 0.0047)	0.0040 (0.0035, 0.0045)	n/a	0.0041 (0.0036, 0.0046)	0.0037 (0.0034, 0.0041)	0.0036 (0.0033, 0.0038)	0.0042 (0.0038, 0.0046)	0.0035 (0.0027, 0.0043)	0.0042 (0.0038, 0.0045)	0.0035 (0.0030, 0.0040)	0.0024 (0.0018, 0.0030)	n/a	0.0038 (0.0036, 0.0041)	0.0036 (0.0029, 0.0042)	n/a	0.0041 (0.0036, 0.0045)	n/a	0.0035 (0.0030, 0.0040)	0.0037 (0.0034, 0.0040)	0.0038 (0.0034, 0.0041)	n/a	0.0040 (0.0037, 0.0043)	0.0042 (0.0039, 0.0045)	0.0043 (0.0033, 0.0053)	n/a	0.0062 (0.0003, 0.0112)	0.0057 (0.0044, 0.0071)
Noncoding	tau_es	0.0078 (0.0074, 0.0082)	n/a	0.0092 (0.0081, 0.0104)	0.0087 (0.0076, 0.0098)	n/a	0.0087 (0.0080, 0.0094)	0.0085 (0.0078, 0.0092)	0.0081 (0.0076, 0.0086)	0.0083 (0.0074, 0.0092)	0.0097 (0.0086, 0.0107)	0.0083 (0.0078, 0.0088)	0.0085 (0.0078, 0.0092)	0.0083 (0.0077, 0.0088)	n/a	0.0087 (0.0081, 0.0092)	0.0086 (0.0077, 0.0095)	n/a	0.0093 (0.0083, 0.0104)	n/a	0.0085 (0.0077, 0.0094)	0.0083 (0.0077, 0.0089)	0.0087 (0.0083, 0.0091)	n/a	0.0070 (0.0065, 0.0075)	0.0081 (0.0076, 0.0086)	0.0062 (0.0048, 0.0075)	n/a	0.0100 (0.0014, 0.0182)	0.0054 (0.0038, 0.0069)
Noncoding	tau_a1	0.0144 (0.0141, 0.0147)	n/a	0.0169 (0.0161, 0.0177)	0.0169 (0.0161, 0.0177)	n/a	0.0159 (0.0152, 0.0165)	0.0145 (0.0140, 0.0151)	0.0146 (0.0141, 0.0150)	0.0152 (0.0145, 0.0158)	0.0158 (0.0148, 0.0168)	0.0158 (0.0154, 0.0163)	0.0160 (0.0154, 0.0166)	0.0154 (0.0149, 0.0158)	n/a	0.0156 (0.0152, 0.0160)	0.0164 (0.0155, 0.0172)	n/a	0.0160 (0.0153, 0.0168)	n/a	0.0157 (0.0151, 0.0163)	0.0147 (0.0143, 0.0151)	0.0149 (0.0145, 0.0152)	n/a	0.0139 (0.0134, 0.0143)	0.0151 (0.0146, 0.0155)	0.0170 (0.0160, 0.0179)	n/a	0.0244 (0.0185, 0.0303)	0.0155 (0.0143, 0.0167)
Noncoding	tau_r	0.0222 (0.0217, 0.0227)	n/a	0.0255 (0.0244, 0.0266)	0.0254 (0.0243, 0.0265)	n/a	0.0236 (0.0229, 0.0244)	0.0238 (0.0230, 0.0245)	0.0232 (0.0225, 0.0239)	0.0238 (0.0229, 0.0246)	0.0259 (0.0247, 0.0270)	0.0254 (0.0247, 0.0262)	0.0242 (0.0234, 0.0250)	0.0233 (0.0226, 0.0239)	n/a	0.0240 (0.0234, 0.0246)	0.0252 (0.0242, 0.0262)	n/a	0.0256 (0.0246, 0.0266)	n/a	0.0244 (0.0235, 0.0252)	0.0228 (0.0222, 0.0233)	0.0232 (0.0227, 0.0237)	n/a	0.0235 (0.0228, 0.0243)	0.0225 (0.0219, 0.0231)	0.0244 (0.0231, 0.0256)	n/a	0.0385 (0.0292, 0.0477)	0.0247 (0.0230, 0.0265)
Noncoding	theta_a2	0.0009 (0.0003, 0.0016)	n/a	0.0030 (0.0009, 0.0049)	0.0023 (0.0007, 0.0040)	n/a	0.0015 (0.0004, 0.0029)	0.0018 (0.0006, 0.0031)	0.0015 (0.0004, 0.0026)	0.0019 (0.0004, 0.0035)	0.0035 (0.0013, 0.0058)	0.0015 (0.0005, 0.0025)	0.0018 (0.0005, 0.0031)	0.0014 (0.0004, 0.0024)	n/a	0.0011 (0.0003, 0.0019)	0.0021 (0.0006, 0.0037)	n/a	0.0017 (0.0005, 0.0030)	n/a	0.0013 (0.0003, 0.0024)	0.0013 (0.0004, 0.0023)	0.0011 (0.0004, 0.0019)	n/a	0.0012 (0.0004, 0.0022)	0.0011 (0.0003, 0.0020)	0.0072 (0.0008, 0.0224)	n/a	0.0151 (0.0028, 0.0310)	0.0042 (0.0009, 0.0082)
Noncoding	theta_nmbdes	0.0052 (0.0043, 0.0060)	n/a	0.0070 (0.0040, 0.0105)	0.0082 (0.0056, 0.0112)	n/a	0.0076 (0.0052, 0.0101)	0.0060 (0.0047, 0.0074)	0.0050 (0.0041, 0.0059)	0.0060 (0.0043, 0.0079)	0.0103 (0.0066, 0.0144)	0.0062 (0.0050, 0.0075)	0.0069 (0.0050, 0.0090)	0.0065 (0.0051, 0.0080)	n/a	0.0056 (0.0046, 0.0066)	0.0097 (0.0069, 0.0129)	n/a	0.0074 (0.0053, 0.0096)	n/a	0.0073 (0.0056, 0.0091)	0.0064 (0.0052, 0.0075)	0.0057 (0.0048, 0.0066)	n/a	0.0055 (0.0046, 0.0065)	0.0062 (0.0049, 0.0076)	0.0039 (0.0023, 0.0055)	n/a	0.0144 (0.0017, 0.0320)	0.0052 (0.0023, 0.0085)
Noncoding	theta_nmbd2	0.0081 (0.0062, 0.0099)	n/a	0.0128 (0.0074, 0.0189)	0.0128 (0.0064, 0.0199)	n/a	0.0099 (0.0064, 0.0138)	0.0111 (0.0075, 0.0149)	0.0092 (0.0065, 0.0119)	0.0115 (0.0078, 0.0155)	0.0174 (0.0101, 0.0253)	0.0103 (0.0075, 0.0132)	0.0111 (0.0071, 0.0155)	0.0092 (0.0062, 0.0125)	n/a	0.0095 (0.0068, 0.0124)	0.0184 (0.0107, 0.0270)	n/a	0.0137 (0.0091, 0.0189)	n/a	0.0106 (0.0067, 0.0148)	0.0104 (0.0078, 0.0132)	0.0114 (0.0090, 0.0140)	n/a	0.0118 (0.0077, 0.0164)	0.0091 (0.0066, 0.0119)	0.0070 (0.0035, 0.0110)	n/a	0.0227 (0.0045, 0.0436)	0.0093 (0.0033, 0.0169)
Noncoding	theta_nmbd1	0.0081 (0.0062, 0.0099)	n/a	0.0128 (0.0074, 0.0189)	0.0128 (0.0064, 0.0199)	n/a	0.0099 (0.0064, 0.0138)	0.0111 (0.0075, 0.0149)	0.0092 (0.0065, 0.0119)	0.0115 (0.0078, 0.0155)	0.0174 (0.0101, 0.0253)	0.0103 (0.0075, 0.0132)	0.0111 (0.0071, 0.0155)	0.0092 (0.0062, 0.0125)	n/a	0.0095 (0.0068, 0.0124)	0.0184 (0.0107, 0.0270)	n/a	0.0137 (0.0091, 0.0189)	n/a	0.0106 (0.0067, 0.0148)	0.0104 (0.0078, 0.0132)	0.0114 (0.0090, 0.0140)	n/a	0.0118 (0.0077, 0.0164)	0.0091 (0.0066, 0.0119)	0.0070 (0.0035, 0.0110)	n/a	0.0226 (0.0044, 0.0436)	0.0093 (0.0033, 0.0169)
Noncoding	theta_nmb	0.0303 (0.0143, 0.0484)	n/a	0.0198 (0.0052, 0.0362)	0.0240 (0.0057, 0.0449)	n/a	0.0206 (0.0089, 0.0338)	0.0282 (0.0096, 0.0489)	0.0174 (0.0050, 0.0315)	0.0240 (0.0086, 0.0409)	0.0178 (0.0048, 0.0326)	0.0187 (0.0056, 0.0329)	0.0232 (0.0066, 0.0424)	0.0112 (0.0038, 0.0197)	n/a	0.0191 (0.0077, 0.0319)	0.0237 (0.0064, 0.0442)	n/a	0.0250 (0.0066, 0.0466)	n/a	0.0146 (0.0042, 0.0265)	0.0253 (0.0106, 0.0413)	0.0201 (0.0081, 0.0335)	n/a	0.0209 (0.0092, 0.0335)	0.0221 (0.0083, 0.0376)	0.0156 (0.0033, 0.0298)	n/a	0.0230 (0.0052, 0.0435)	0.0214 (0.0056, 0.0400)
Noncoding	theta_nm	0.0050 (0.0045, 0.0055)	n/a	0.0068 (0.0057, 0.0080)	0.0072 (0.0060, 0.0085)	n/a	0.0064 (0.0053, 0.0075)	0.0052 (0.0044, 0.0060)	0.0049 (0.0042, 0.0055)	0.0062 (0.0052, 0.0072)	0.0093 (0.0073, 0.0113)	0.0057 (0.0050, 0.0065)	0.0068 (0.0056, 0.0080)	0.0099 (0.0083, 0.0115)	n/a	0.0062 (0.0056, 0.0068)	0.0076 (0.0061, 0.0093)	n/a	0.0074 (0.0063, 0.0085)	n/a	0.0071 (0.0060, 0.0083)	0.0055 (0.0049, 0.0061)	0.0069 (0.0061, 0.0077)	n/a	0.0049 (0.0042, 0.0056)	0.0054 (0.0047, 0.0060)	0.0056 (0.0036, 0.0079)	n/a	0.0136 (0.0027, 0.0274)	0.0061 (0.0031, 0.0092)
Noncoding	theta_es	0.0058 (0.0049, 0.0067)	n/a	0.0092 (0.0065, 0.0122)	0.0103 (0.0075, 0.0132)	n/a	0.0065 (0.0049, 0.0081)	0.0070 (0.0054, 0.0087)	0.0059 (0.0048, 0.0070)	0.0102 (0.0077, 0.0127)	0.0062 (0.0042, 0.0084)	0.0067 (0.0055, 0.0079)	0.0075 (0.0058, 0.0092)	0.0067 (0.0055, 0.0080)	n/a	0.0073 (0.0061, 0.0085)	0.0083 (0.0062, 0.0104)	n/a	0.0078 (0.0056, 0.0102)	n/a	0.0078 (0.0059, 0.0097)	0.0072 (0.0059, 0.0085)	0.0057 (0.0049, 0.0065)	n/a	0.0067 (0.0056, 0.0078)	0.0071 (0.0059, 0.0083)	0.0081 (0.0050, 0.0114)	n/a	0.0165 (0.0030, 0.0326)	0.0117 (0.0072, 0.0166)
Noncoding	theta_a1	0.0049 (0.0045, 0.0053)	n/a	0.0057 (0.0048, 0.0065)	0.0064 (0.0055, 0.0073)	n/a	0.0057 (0.0050, 0.0064)	0.0053 (0.0048, 0.0058)	0.0049 (0.0044, 0.0053)	0.0051 (0.0044, 0.0057)	0.0064 (0.0055, 0.0074)	0.0056 (0.0051, 0.0060)	0.0056 (0.0049, 0.0062)	0.0049 (0.0044, 0.0053)	n/a	0.0052 (0.0048, 0.0056)	0.0055 (0.0047, 0.0063)	n/a	0.0057 (0.0049, 0.0064)	n/a	0.0051 (0.0045, 0.0057)	0.0050 (0.0046, 0.0055)	0.0055 (0.0051, 0.0059)	n/a	0.0047 (0.0043, 0.0051)	0.0053 (0.0048, 0.0058)	0.0245 (0.0061, 0.0458)	n/a	0.0206 (0.0040, 0.0408)	0.0272 (0.0072, 0.0493)
Noncoding	theta_Aoe	0.0049 (0.0045, 0.0053)	n/a	0.0057 (0.0049, 0.0065)	0.0064 (0.0055, 0.0073)	n/a	0.0057 (0.0050, 0.0064)	0.0053 (0.0048, 0.0058)	0.0049 (0.0044, 0.0053)	0.0051 (0.0044, 0.0057)	0.0064 (0.0055, 0.0074)	0.0056 (0.0051, 0.0060)	0.0056 (0.0049, 0.0062)	0.0049 (0.0044, 0.0053)	n/a	0.0052 (0.0048, 0.0056)	0.0055 (0.0047, 0.0063)	n/a	0.0057 (0.0049, 0.0064)	n/a	0.0051 (0.0045, 0.0057)	0.0050 (0.0046, 0.0055)	0.0055 (0.0051, 0.0059)	n/a	0.0047 (0.0043, 0.0051)	0.0053 (0.0048, 0.0058)	n/a	n/a	n/a	n/a
Noncoding	theta_Num	0.0117 (0.0101, 0.0133)	n/a	0.0209 (0.0151, 0.0271)	0.0110 (0.0085, 0.0136)	n/a	0.0002 (0.0001, 0.0003)	0.0112 (0.0093, 0.0132)	0.0059 (0.0052, 0.0067)	0.0141 (0.0114, 0.0171)	0.0048 (0.0038, 0.0058)	0.0073 (0.0065, 0.0081)	0.0001 (0.0001, 0.0002)	0.0016 (0.0013, 0.0018)	n/a	0.0075 (0.0067, 0.0083)	0.0001 (0.0001, 0.0002)	n/a	0.0143 (0.0113, 0.0175)	n/a	0.0142 (0.0112, 0.0175)	0.0062 (0.0055, 0.0069)	0.0037 (0.0034, 0.0041)	n/a	0.0056 (0.0049, 0.0062)	0.0125 (0.0107, 0.0144)	n/a	n/a	n/a	n/a
Noncoding	theta_Mel	0.0040 (0.0036, 0.0044)	n/a	0.0145 (0.0112, 0.0179)	0.0074 (0.0060, 0.0089)	n/a	0.0093 (0.0078, 0.0109)	0.0002 (0.0001, 0.0002)	0.0048 (0.0042, 0.0053)	0.0074 (0.0062, 0.0086)	0.0009 (0.0007, 0.0011)	0.0002 (0.0001, 0.0003)	0.0048 (0.0041, 0.0056)	0.0014 (0.0012, 0.0017)	n/a	0.0074 (0.0066, 0.0082)	0.0042 (0.0035, 0.0050)	n/a	0.0055 (0.0046, 0.0064)	n/a	0.0015 (0.0012, 0.0017)	0.0077 (0.0068, 0.0085)	0.0001 (0.0001, 0.0002)	n/a	0.0049 (0.0044, 0.0054)	0.0050 (0.0044, 0.0055)	n/a	n/a	n/a	n/a
Noncoding	theta_Bur	0.0051 (0.0047, 0.0055)	n/a	0.0101 (0.0088, 0.0113)	0.0101 (0.0088, 0.0115)	n/a	0.0060 (0.0053, 0.0068)	0.0074 (0.0067, 0.0081)	0.0056 (0.0051, 0.0061)	0.0071 (0.0063, 0.0080)	0.0082 (0.0071, 0.0093)	0.0064 (0.0059, 0.0069)	0.0071 (0.0063, 0.0079)	0.0063 (0.0057, 0.0069)	n/a	0.0058 (0.0053, 0.0062)	0.0069 (0.0060, 0.0078)	n/a	0.0089 (0.0079, 0.0100)	n/a	0.0073 (0.0065, 0.0081)	0.0064 (0.0059, 0.0069)	0.0063 (0.0058, 0.0067)	n/a	0.0065 (0.0059, 0.0070)	0.0050 (0.0046, 0.0055)	n/a	n/a	n/a	n/a
Noncoding	theta_Dor	0.0021 (0.0019, 0.0023)	n/a	0.0032 (0.0027, 0.0038)	0.0041 (0.0035, 0.0048)	n/a	0.0024 (0.0020, 0.0027)	0.0027 (0.0024, 0.0030)	0.0022 (0.0020, 0.0025)	0.0028 (0.0023, 0.0032)	0.0028 (0.0023, 0.0033)	0.0025 (0.0023, 0.0028)	0.0029 (0.0025, 0.0034)	0.0025 (0.0022, 0.0028)	n/a	0.0026 (0.0024, 0.0029)	0.0027 (0.0023, 0.0032)	n/a	0.0034 (0.0029, 0.0039)	n/a	0.0026 (0.0022, 0.0030)	0.0027 (0.0024, 0.0030)	0.0027 (0.0025, 0.0029)	n/a	0.0027 (0.0024, 0.0029)	0.0023 (0.0020, 0.0025)	n/a	n/a	n/a	n/a
Noncoding	theta_Era	0.0051 (0.0047, 0.0056)	n/a	0.0008 (0.0005, 0.0011)	0.0071 (0.0060, 0.0083)	n/a	0.0083 (0.0073, 0.0095)	0.0023 (0.0019, 0.0026)	0.0076 (0.0068, 0.0083)	0.0004 (0.0003, 0.0006)	0.0057 (0.0048, 0.0067)	0.0061 (0.0055, 0.0066)	0.0080 (0.0070, 0.0091)	0.0078 (0.0070, 0.0086)	n/a	0.0001 (0.0000, 0.0001)	0.0094 (0.0079, 0.0108)	n/a	0.0031 (0.0026, 0.0036)	n/a	0.0002 (0.0001, 0.0003)	0.0002 (0.0001, 0.0002)	0.0081 (0.0075, 0.0087)	n/a	0.0054 (0.0049, 0.0060)	0.0074 (0.0066, 0.0081)	n/a	n/a	n/a	n/a
Noncoding	theta_Sar	0.0037 (0.0034, 0.0040)	n/a	0.0049 (0.0042, 0.0057)	0.0052 (0.0044, 0.0060)	n/a	0.0048 (0.0042, 0.0054)	0.0045 (0.0040, 0.0050)	0.0041 (0.0037, 0.0045)	0.0045 (0.0039, 0.0050)	0.0057 (0.0049, 0.0066)	0.0039 (0.0035, 0.0042)	0.0040 (0.0035, 0.0046)	0.0040 (0.0036, 0.0044)	n/a	0.0047 (0.0043, 0.0050)	0.0039 (0.0033, 0.0046)	n/a	0.0045 (0.0039, 0.0052)	n/a	0.0043 (0.0037, 0.0048)	0.0043 (0.0039, 0.0046)	0.0044 (0.0041, 0.0048)	n/a	0.0036 (0.0033, 0.0040)	0.0042 (0.0038, 0.0047)	n/a	n/a	n/a	n/a
Noncoding	theta_Tal	0.0045 (0.0041, 0.0049)	n/a	0.0069 (0.0060, 0.0079)	0.0113 (0.0099, 0.0128)	n/a	0.0041 (0.0035, 0.0047)	0.0052 (0.0046, 0.0058)	0.0055 (0.0049, 0.0060)	0.0057 (0.0050, 0.0065)	0.0054 (0.0046, 0.0063)	0.0065 (0.0060, 0.0071)	0.0055 (0.0048, 0.0062)	0.0067 (0.0060, 0.0073)	n/a	0.0074 (0.0069, 0.0080)	0.0071 (0.0061, 0.0081)	n/a	0.0097 (0.0086, 0.0109)	n/a	0.0091 (0.0081, 0.0100)	0.0055 (0.0050, 0.0060)	0.0059 (0.0055, 0.0063)	n/a	0.0058 (0.0053, 0.0063)	0.0040 (0.0036, 0.0044)	n/a	n/a	n/a	n/a
Noncoding	theta_r	0.0149 (0.0134, 0.0163)	n/a	0.0115 (0.0089, 0.0141)	0.0160 (0.0130, 0.0191)	n/a	0.0122 (0.0104, 0.0141)	0.0155 (0.0135, 0.0175)	0.0159 (0.0140, 0.0177)	0.0131 (0.0112, 0.0151)	0.0099 (0.0075, 0.0123)	0.0128 (0.0112, 0.0145)	0.0133 (0.0113, 0.0153)	0.0145 (0.0128, 0.0162)	n/a	0.0152 (0.0136, 0.0167)	0.0122 (0.0098, 0.0147)	n/a	0.0143 (0.0118, 0.0168)	n/a	0.0183 (0.0159, 0.0208)	0.0133 (0.0118, 0.0147)	0.0138 (0.0125, 0.0151)	n/a	0.0177 (0.0158, 0.0197)	0.0147 (0.0131, 0.0164)	0.0163 (0.0131, 0.0196)	n/a	0.0175 (0.0045, 0.0321)	0.0179 (0.0133, 0.0227)

[truncated: 13 more sheets: 11-k-etales-9spp-3s, 12-l-data-hmelv25-res, 13-m-hmelv25-res-msc, 14-n-hmelv25-res-msc-chr, 15-o-hmelv25-all-3s-Aoe, 16-p-hmelv25-all-3s-Era, 17-q-hmelv25-res-msci-noncod, 18-r-hmelv25-res-msci-exonic, 19-s-hmelv25-res-eph-im, 20-t-hmelv25-res-ep-im-samethet, 21-u-hmelv25-res-tcm-im, 22-v-silv_chr15-msc, 23-w-hmelv25-res-chr15b]
